# Supplementary material for: Genetics and Beyond – The Transcriptome of Human Monocytes and Disease Susceptibility
Source: PLoS One. 2010 May 18;5(5):e10693. doi: 10.1371/journal.pone.0010693 (PMC2872668; doi:10.1371/journal.pone.0010693)
Supplement: File S2 — Comparison cis eQTL in GHS and the study of Stranger et al. (0.10 MB XLS) [file pone.0010693.s007.xls]

## Sheet: Supplementary file 2. Compariso
	GHS				GHS	GHS	Stranger	Stranger
eQTL name	Best cis eSNP in GHS	Chrom	Position	SNP-eQTL distance	P-value	Significance	P-value	P-value class
ABHD4	rs970348	14	22139693	0	1.27e-06	1	8.68e-12	3
ACOX3	rs3756187	4	8429232	0	6.67e-27	1	3.77e-15	3
ACP6	rs1344	1	145585897	0	7.94e-13	1	5.25e-10	2
ADCY3	rs7567997	2	24950456	0	1.49e-114	1	4.39e-11	3
ADFP	rs2229536	9	19106543	0	3.69e-89	1	1.89e-08	1
ADRB2	rs11119135	1	207066954	1000000000	9.77e-07	0	7.42e-08	1
AHI1	rs7750586	6	135869366	0	1.42e-49	1	1.39e-11	3
AHSA2	rs4671398	2	61294011	24447	3.46e-76	1	1.93e-06	1
AIM1	rs12528406	6	107147668	22640	1.04e-13	1	1.1e-16	4
AKAP10	rs203457	17	19758930	0	8.01e-66	1	2.17e-09	2
AKAP7	rs2204732	6	131502621	5533	5.99e-66	1	2.71e-08	1
AKR1A1	rs16860145	3	114039083	1000000000	7.36e-07	0	4.41e-12	3
ALDH8A1	rs4472368	6	135315925	2988	9.78e-30	1	1.22e-12	3
ANXA1	rs639446	9	75249776	274647	4.1e-15	1	3.34e-11	3
AP1S1	rs4458837	8	32423925	1000000000	1.39e-07	0	1.45e-08	1
AP3S2	rs7173483	15	88172552	5241	7.78e-48	1	4.05e-21	5
AP4M1	rs4729568	7	99477381	59685	3.04e-29	1	8.19e-19	4
APOBEC3B	rs6903353	6	127876235	1000000000	2.34e-06	0	9.33e-16	4
ARHGAP22	rs1822861	10	49504332	21150	1.48e-73	1	3.03e-13	3
ARHGEF19	rs221035	1	16399116	0	1.19e-112	1	8.27e-19	4
ARNTL	rs900144	11	13250844	5057	4.79e-20	1	6.61e-12	3
ASAHL	rs17221100	4	77042249	15400	1.29e-98	1	1.13e-21	5
ATP6V1C1	rs2132864	8	104155041	580	5.62e-59	1	3.65e-11	3
ATP6V1E2	rs12997164	2	46612250	0	7.11e-94	1	3.11e-13	3
B4GALT1	rs2320704	17	36869020	1000000000	8.04e-07	0	1.66e-12	3
B4GALT2	rs7769494	6	165499307	1000000000	1.89e-07	0	1.49e-13	3
B4GALT7	rs234375	5	176934315	25463	2.62e-15	1	1.31e-07	1
BBS2	rs13337155	16	55062225	13576	3.19e-135	1	1.26e-17	4
BLK	rs2736340	8	11381382	7548	2.08e-23	1	1.58e-17	4
BXDC1	rs12527783	6	111462478	8992	1.46e-33	1	4.86e-07	1
C1QTNF6	rs229535	22	35918512	4236	1.47e-10	1	4.17e-11	3
CA13	rs11261471	8	86388231	4677	1.86e-09	1	6.77e-09	2
CAMKK2	rs11065504	12	120164843	0	2.4e-107	1	1.27e-14	3
CARD8	rs1062808	19	53403288	37	4.99e-197	1	3.75e-22	5
CAST	rs26483	5	96042372	0	2.18e-14	1	2.26e-13	3
CAST	rs26484	5	96042325	0	2.18e-14	1	2.26e-13	3
CCL5	rs4239252	17	31187678	34930	3.67e-13	1	4.24e-17	4
CCNDBP1	rs7742112	6	73840369	1000000000	7.53e-08	0	9.96e-48	6
CD151	rs5030780	11	828110	0	1.31e-155	1	5.91e-32	6
CD244	rs952804	1	159111369	12053	1.09e-08	1	3.14e-10	2
CD79B	rs2665846	17	59342655	17177	9.58e-12	1	3.17e-16	4
CDC7	rs13447454	1	91738994	18	1.27e-31	1	4.83e-07	1
CDK5RAP2	rs1547266	9	122203297	0	1.54e-142	1	4.52e-43	6
CDKN1A	rs1998071	14	58610566	1000000000	6.5e-08	0	2.87e-11	3
CGI-96	rs4822146	22	41240713	-999	3.16e-228	0	2.41e-07	1
CHAF1A	rs11747434	5	172711817	1000000000	2.64e-07	0	1.73e-10	2
CHI3L2	rs639210	1	111544284	27520	2.34e-51	1	2.32e-19	4
CHPT1	rs2695284	12	100613449	2099	2.7e-33	1	8.11e-22	5
CIAO1	rs10168534	2	79171754	17123857	5.26e-07	0	2.44e-14	3
CKLF	rs11024779	11	18717578	1000000000	5.46e-06	0	6.51e-09	2
CLK4	rs12514827	5	178022706	36046	1.68e-07	1	3.11e-10	2
CNN2	rs2020000	19	989222	0	1.29e-83	1	3.43e-09	2
COL24A1	rs6680321	1	86357283	0	9.18e-08	1	1.95e-09	2
COMT	rs5993883	22	18317638	0	8.37e-09	1	1.2e-08	1
COPG2	rs1155219	7	130023348	19210	1.93e-10	1	1.02e-08	1
CORO2A	rs751800	9	99924385	1914	7.52e-41	1	1.35e-13	3
CP110	rs7295633	12	3297087	-999	4.74e-07	0	7.53e-10	2
CPEB4	rs1484803	5	173282446	0	5.19e-66	1	6.75e-23	5
CPEB4	rs966544	5	173283011	0	5.19e-66	1	6.75e-23	5
CPEB4	rs1564823	5	173315800	0	5.19e-66	1	6.75e-23	5
CPNE1	rs6060578	20	33768859	52597	1.38e-157	1	2.32e-28	6
CPSF1	rs4380978	8	145570274	18980	3.8e-133	1	1.32e-13	3
CRIPT	rs3087822	2	46705537	0	2.55e-185	1	1.62e-29	6
CRNKL1	rs6081840	20	19956581	6431	1.4e-27	1	9.23e-18	4
CRYZ	rs405445	1	74993738	22405	4.12e-262	1	4.33e-15	3
CSE1L	rs6852766	4	66016285	1000000000	8.06e-07	0	3.83e-07	1
CSNK2A2	rs2953329	1	242092622	1000000000	1.71e-06	0	4.91e-08	1
CSTB	rs1573336	21	44064565	43878	6.26e-07	1	2.58e-19	4
CTNS	rs222790	17	3478239	8272	2.62e-51	1	5.32e-14	3
CTSH	rs3825932	15	77022501	0	1.25e-28	1	1.1e-18	4
CTSK	rs12568757	1	148996417	38894	3.1e-29	1	3.89e-09	2
CTSS	rs17658705	1	148944695	24480	3.57e-33	1	8.07e-15	3
CTSW	rs694994	11	65409885	2097	2.99e-24	1	8.71e-09	2
DAPK3	rs4648453	1	3015572	1000000000	3.61e-10	0	1.05e-13	3
DCLRE1B	rs878129	1	114260718	2503	7.25e-39	1	1.03e-20	4
DCTD	rs1130902	4	184049040	0	8.75e-10	1	7.05e-30	6
DCXR	rs9903371	17	77586353	693	3.98e-94	1	1.35e-19	4
DDB2	rs4684146	3	1399745	1000000000	1.4e-08	0	1.83e-06	1
DDIT4L	rs2163881	4	101560408	229760	4.43e-19	1	1.7e-08	1
DDX51	rs315113	12	68072810	63114285	2.21e-28	0	1.57e-11	3
DDX52	rs3813910	17	33077472	0	1.93e-06	1	1.06e-12	3
DFNA5	rs1476520	7	24762754	0	1.86e-306	1	3.08e-22	5
DHX32	rs3781058	10	127518257	0	1.71e-15	1	6.87e-12	3
DHX38	rs6499560	16	70705167	856	1.47e-27	1	6.53e-13	3
DISC1	rs11122319	1	229874905	0	1.22e-09	1	7.35e-13	3
DLEU2	rs9568363	13	49429768	1000000000	3.27e-37	0	7.74e-09	2
DNASE1L3	rs4681818	3	58159891	0	5.84e-28	1	4.99e-22	5
DOK4	rs6702974	1	84898653	1000000000	1.15e-06	0	1.87e-10	2
DPYSL4	rs4880341	10	133842679	7715	7.43e-41	1	1.39e-17	4
DSCR5	rs12483676	21	46208603	-999	1.68e-08	0	4.7e-20	4
DTNB	rs12769875	10	2440019	1000000000	1.82e-07	0	1.29e-32	6
DUSP14	rs853191	17	32895871	28193	6.8e-73	1	1.03e-09	2
EAF2	rs1807354	16	10194207	1000000000	4.83e-08	0	1.27e-06	1
ECHDC3	rs3829154	10	11822759	1603	3.13e-141	1	4.86e-08	1
EIF2B2	rs175057	14	74559385	13340	6.81e-80	1	5.85e-16	4
EIF2S1	rs255052	16	66582496	1000000000	3.7e-07	0	7.08e-30	6
EIF5A	rs4796398	17	7148921	2169	1.29e-236	1	3.6e-13	3
ELL3	rs11686299	2	238503713	1000000000	1.11e-07	0	2.48e-10	2
ENTPD1	rs4396219	10	97551931	0	3.38e-18	1	4.29e-23	5
ERAL1	rs7277040	21	40076885	1000000000	3.59e-06	0	8.2e-20	4
ERCC1	rs2336219	19	50604246	466	8.99e-10	1	6.23e-18	4
F13A1	rs12485738	3	56840816	1000000000	1.21e-12	0	7.2e-14	3
FAM14B	rs10253606	7	98129680	1000000000	3.89e-07	0	1.72e-13	3
FANCA	rs10809254	9	10942730	1000000000	9.92e-07	0	2.07e-10	2
FCGBP	rs2231738	19	45141888	9515	1.25e-34	1	2.64e-09	2
FDPS	rs946918	14	82542621	1000000000	1.81e-06	0	1.33e-09	2
FDX1	rs10488764	11	109836841	0	2.94e-61	1	6.3e-11	3
FIBP	rs694994	11	65409885	0	7.33e-08	1	5.93e-08	1
FKBP1A	rs295073	17	29804689	1000000000	3.4e-08	0	2.02e-22	5
FN3KRP	rs2243523	17	78273738	-999	3.63e-143	0	1.26e-13	3
FTSJ2	rs4777989	15	90807744	1000000000	4.29e-06	0	8.88e-08	1
FTSJ3	rs17035177	1	116381302	1000000000	1.32e-06	0	8.38e-12	3
FTSJ3	rs10923960	1	116378633	1000000000	1.32e-06	0	8.38e-12	3
FUT4	rs17747275	4	144715730	1000000000	4.42e-06	0	1.14e-06	1
GAA	rs1442314	17	75691593	0	4.2e-95	1	9.53e-14	3
GALNT14	rs17714261	19	49669102	1000000000	1.08e-06	0	1.2e-12	3
GALNT4	rs7310515	12	88423758	13562	5.83e-111	1	3.64e-14	3
GCAT	rs2285177	22	36535840	0	2.32e-16	1	3.04e-07	1
GCN1L1	rs7978656	12	119118672	1776	9.2e-29	1	1.18e-10	2
GGA2	rs6497670	16	23443867	14558	2.5e-08	1	2.03e-10	2
GLTP	rs1706826	15	43275335	1000000000	1.12e-07	0	1.16e-12	3
GOLPH4	rs7634939	3	169208102	1823	6.31e-27	1	3.69e-13	3
GOLPH4	rs7632500	3	169208043	1882	6.31e-27	1	3.69e-13	3
GPNMB	rs199355	7	23263058	0	1.5e-42	1	2.36e-07	1
GPR63	rs10239038	7	15400590	1000000000	1.26e-06	0	2.65e-09	2
GRLF1	rs17628982	8	8624999	1000000000	2.3e-06	0	1.69e-07	1
GSTM1	rs11807	1	110062265	24375	4.16e-50	1	1.29e-65	6
GSTM2	rs10857796	1	110036555	0	1.25e-44	1	4.41e-27	6
GSTM3	rs1887547	1	110097295	12112	4.12e-30	1	1.52e-07	1
GSTM4	rs1799875	1	109950497	49729	1.33e-58	1	5.16e-14	3
GSTT1	rs5760176	22	22732321	18050	2.63648991688733e-317	1	1.27e-67	6
HCLS1	rs10934557	3	122895084	32679	1.77e-76	1	6.41e-10	2
HEBP2	rs1928278	6	138760216	6813	5.83e-12	1	6.89e-16	4
HIBCH	rs2136569	2	190875659	0	2.26e-45	1	2.12e-13	3
HLA-C	rs4394274	6	31426143	-999	2.64e-158	0	2.58e-18	4
HLA-DQA1	rs9272219	6	32710247	2865	2.55e-189	1	4.66e-70	6
HLA-DQA2	rs2231700	12	67939413	1000000000	5.88e-10	0	1.11e-38	6
HLA-DRB5	rs3129868	6	32512355	80823	0	1	2.56e-45	6
HLA-DRB5	rs9270986	6	32682038	76016	0	1	2.56e-45	6
HNRPH1	rs4078141	5	178984144	868	9.73e-33	1	9.22e-17	4
HNRPK	rs12940814	17	10167005	1000000000	3.75e-06	0	1.72e-11	3
HSD17B12	rs11037654	11	43785335	0	1.86e-12	1	3.59e-23	5
HSF2BP	rs328150	18	42424383	1000000000	3.42e-07	0	1.06e-11	3
IFIT5	rs787494	1	67858174	1000000000	4.52e-08	0	1.69e-09	2
IFNAR2	rs6776326	3	6256402	1000000000	8.04e-06	0	2.15e-06	1
IL10RB	rs1058867	21	33591251	0	4.42e-22	1	1.31e-06	1
IL16	rs4778636	15	79378694	0	7.92e-64	1	5.68e-24	5
IMMT	rs12477274	2	86252296	0	1.09e-11	1	6.63e-10	2
INADL	rs2604235	11	128317781	1000000000	5.35e-07	0	5.57e-19	4
INPP1	rs3791815	2	190927859	0	7.83e-10	1	4.5e-10	2
IPP	rs315113	12	68072810	1000000000	1.27e-08	0	8.31e-14	3
IQCB1	rs1920321	3	123039941	3325	4.36e-26	1	5.83e-09	2
IRAK1BP1	rs1507150	6	79605316	28592	1.57e-21	1	1.45e-15	3
IRF5	rs12155080	7	128445975	68655	0	1	4.95e-60	6
IRF5	rs2172876	7	128390528	13208	0	1	4.95e-60	6
IRF5	rs2272347	7	128406651	29331	0	1	4.95e-60	6
IRF5	rs4731541	7	128465472	88152	0	1	4.95e-60	6
IRS1	rs4675052	2	226700070	608112	1.41e-22	1	2.77e-08	1
IRS1	rs2140239	2	226696506	611676	1.41e-22	1	2.77e-08	1
ISL2	rs12698762	7	68140650	1000000000	2.62e-07	0	1.41e-10	2
ITIH4	rs10510761	3	52940295	100561	1.33e-61	1	3.86e-14	3
ITPA	rs9101	20	3152084	0	7.64e-18	1	1.29e-08	1
IVD	rs7165012	15	38441330	43648	1.01e-15	1	4.64e-22	5
KDELR2	rs9640023	7	6511860	21486	3.76e-90	1	1.07e-14	3
KIF24	rs12582418	12	93526562	-999	3.39e-07	0	1.83e-06	1
KLF5	rs9573163	13	72806847	257193	5.82e-18	1	9.73e-15	3
KLK1	rs16952741	17	3035135	1000000000	1.85e-10	0	2.74e-13	3
KLRK1	rs7180119	15	91994204	1000000000	1.24e-08	0	2.96e-12	3
LCMT1	rs36862	7	14937047	1000000000	1.63e-07	0	6.16e-63	6
LGALS9	rs9905566	17	22992427	0	4.48e-52	1	1.48e-14	3
LHPP	rs908365	10	126134955	5422	3.16e-27	1	4.67e-09	2
LILRB1	rs13382124	19	59855149	14358	2.1e-09	1	9.33e-14	3
LIPT1	rs12613624	2	99099173	38677	4.12e-47	1	2.23e-13	3
LIPT1	rs1133977	2	99108416	29434	4.12e-47	1	2.23e-13	3
LRDD	rs6016425	20	38776878	1000000000	5.41e-06	0	1.07e-08	1
LTBR	rs12312694	12	8635276	2264282	1.56e-07	0	3.1e-14	3
LY86	rs1330803	6	6513761	19579	7e-39	1	1.78e-09	2
LZIC	rs12187639	5	170132014	1000000000	1.21e-06	0	4.77e-32	6
MAP1B	rs7144231	14	41600587	1000000000	3.13e-06	0	1.85e-16	4
MAPK3	rs11642740	16	29968156	64772	1.75e-51	1	1.96e-05	1
MAPK9	rs6601104	5	179596220	0	3.34e-14	1	7.75e-12	3
MBIP	rs17804800	16	11032794	1000000000	7.15e-07	0	2.07e-07	1
MCM3AP	rs10978056	9	9866564	1000000000	8.27e-07	0	2.02e-11	3
MCMDC1	rs17684525	5	126705877	1000000000	1.75e-08	0	4.25e-16	4
MCOLN2	rs634294	1	85175585	0	4.75e-56	1	2.91e-15	3
MDGA1	rs9787465	10	55562067	1000000000	8.98e-08	0	7.38e-11	3
MED8	rs12619197	2	22420053	1000000000	3.37e-07	0	5.37e-09	2
METTL4	rs2025596	1	66925737	1000000000	1.58e-07	0	2.11e-08	1
MGMT	rs7905095	10	131338133	0	8.69e-107	1	4.66e-17	4
MGST3	rs4147596	1	163867989	0	5.2e-49	1	9.55e-12	3
MICA	rs2596457	6	31526001	9911	1.19e-68	1	9.8e-08	1
MMAB	rs10099088	8	121008839	1000000000	4.82e-08	0	2.79e-10	2
MOCOS	rs17648916	18	31975482	45996	2.86e-09	1	1.1e-11	3
MPEG1	rs684471	12	51397594	-999	1.91e-07	0	1.19e-08	1
MPHOSPH6	rs2967370	16	80763959	2629	1.7e-25	1	6.5e-07	1
MR1	rs10797667	1	179295356	3046	3.04e-12	1	7.03e-14	3
MRPL14	rs1935611	6	44201720	0	1.45e-28	1	2.18e-12	3
MRPL21	rs636049	11	68423774	0	8.7e-103	1	9.09e-26	6
MRPL28	rs12312694	12	8635276	1000000000	3.95e-07	0	3.08e-11	3
MRPL34	rs3826700	19	17287501	8849	4.53e-32	1	4.24e-08	1
MRPL43	rs1122556	10	102696588	30981	8.49e-21	1	1.61e-64	6
MRPL53	rs1063588	2	74543886	8735	6.75e-21	1	6.81e-25	5
MRPL54	rs12459781	19	3713119	546	6.7e-62	1	5.86e-20	4
MRPS36	rs6450023	5	68561819	0	4.68e-07	1	1.04e-12	3
MRPS9	rs12617795	2	105078336	0	2.41e-31	1	1.31e-08	1
MRPS9	rs12616421	2	105081619	0	2.41e-31	1	1.31e-08	1
MTRR	rs327588	5	7961359	7126	1.18e-138	1	1.55e-23	5
MUC20	rs863582	3	196964365	14155	6.69e-60	1	6.4e-12	3
MUM1	rs17673260	19	1315306	0	6.04e-16	1	1.32e-07	1
MYBL2	rs11121906	1	12411062	1000000000	8.33e-07	0	4.79e-18	4
MYBL2	rs6683371	1	12415169	1000000000	8.33e-07	0	4.79e-18	4
MYEOV	rs11712999	3	56830720	1000000000	3.48e-08	0	1.16e-09	2
MYH3	rs2106400	17	10532298	32106	2.87e-13	1	2.04e-10	2
MYO5A	rs16890815	8	119388649	1000000000	2.28e-08	0	7.1e-11	3
MYOM2	rs7005151	8	2084462	3683	7.41e-98	1	1.47e-17	4
MYOZ1	rs12128551	1	185173669	1000000000	5.31e-07	0	1.48e-06	1
NAPG	rs544553	18	10514453	1578	6.73e-12	1	1.61e-14	3
NCF4	rs4821544	22	35588449	0	2.25e-28	1	1.37e-10	2
NDUFA10	rs4077387	2	240549364	0	9.38e-46	1	1.11e-08	1
NDUFS5	rs10888650	1	39279748	6875	1.98e-14	1	2.12e-26	6
NDUFV3	rs4148974	21	43196789	0	3.55e-80	1	6.28e-09	2
NEDD9	rs4620101	6	11287427	4093	2.87e-19	1	9.68e-18	4
NME1	rs16949649	17	46585307	612	2.18e-58	1	4.41e-08	1
NME6	rs966380	4	98654412	1000000000	4.75e-06	0	2.59e-06	1
NMNAT3	rs16849309	3	140876843	0	1.55e-178	1	7.81e-30	6
NP	rs1713459	14	20003839	0	1.8e-51	1	2.12e-09	2
NPEPL1	rs6070563	20	56728536	4230	7.78e-42	1	4.04e-15	3
NPHP3	rs11718115	3	133918513	0	2.06e-61	1	1.46e-06	1
NQO2	rs1028612	6	2976992	11997	6.12e-156	1	3.61e-14	3
NR1D2	rs11922609	3	23965418	0	2.29e-11	1	1.41e-13	3
NR2F6	rs16865181	2	224342529	1000000000	5.75e-10	0	2.18e-12	3
NUBP2	rs692198	17	38324922	1000000000	4.46e-08	0	2.89e-12	3
NUCB2	rs214097	11	17248075	6785	1.15e-19	1	1.63e-11	3
NUDT13	rs7078127	10	74517640	22576	8.37e-11	1	1.59e-19	4
NUDT2	rs10972063	9	34326342	0	3.69e-182	1	5.05e-45	6
NUP50	rs132883	22	43947175	0	1.02e-86	1	1.67e-11	3
OAS1	rs7996782	13	38937224	1000000000	2.42e-07	0	1.06e-29	6
ORMDL3	rs4836703	9	119588755	1000000000	3.98e-08	0	5.9e-17	4
OVGP1	rs12740822	1	111816815	44893	5.71e-14	1	1.24e-14	3
OXCT2	rs182799	1	40006828	954	4.05e-18	1	1.25e-13	3
PACSIN1	rs4917014	7	50276409	1000000000	1.47e-10	0	5.6e-11	3
PAQR6	rs2274226	1	154581251	96780	4.75e-105	1	2.69e-10	2
PASK	rs10461822	5	18430367	1000000000	2.8e-06	0	9.39e-12	3
PAX8	rs11123172	2	113700774	0	2.12e-75	1	1e-14	3
PCSK4	rs13401104	2	236770257	1000000000	9.34e-07	0	2.61e-08	1
PDCD4	rs13162885	5	5913075	1000000000	1.39e-07	0	2.71e-12	3
PDE4B	rs4352802	8	27638744	1000000000	4.5e-07	0	2e-10	2
PET112L	rs2175409	4	152921106	19497	2.07e-31	1	2.4e-18	4
PEX5	rs12828421	12	7226484	7740	7.78e-65	1	3.26e-14	3
PEX6	rs3818554	6	43042598	0	0	1	6.5e-22	5
PEX6	rs2274517	6	43040693	0	0	1	6.5e-22	5
PFAAP5	rs9591001	13	31940870	-999	8.46e-235	0	6.56e-14	3
PGS1	rs2090205	17	73897869	0	2.77e-11	1	7.08e-08	1
PHACS	rs2074040	11	44049899	-999	8.58e-181	0	1.01e-41	6
PHF15	rs7837382	8	15734826	1000000000	1.41e-07	0	1.26e-07	1
PIGN	rs7235710	18	58003081	0	5.53e-60	1	5.85e-13	3
PKHD1L1	rs1344142	3	56832473	1000000000	2.23e-08	0	8.3e-60	6
PLA2G4C	rs385203	19	53298343	0	6.47e-89	1	5.01e-24	5
PLCB2	rs2229690	15	38377426	0	1.06e-07	1	1.01e-12	3
PLEKHA3	rs2098145	7	14751777	1000000000	2.88e-08	0	9.58e-13	3
PLTP	rs12572101	10	75270657	1000000000	8.78e-07	0	2.53e-14	3
POLE4	rs17100267	14	101034975	1000000000	2.69e-06	0	8.17e-15	3
POLR1A	rs7236642	18	18515884	1000000000	7.26e-08	0	3.22e-15	3
POLR3F	rs1469347	2	126118291	1000000000	2.35e-07	0	6.78e-24	5
POP5	rs17002218	4	77944115	1000000000	1.25e-08	0	8.53e-08	1
PPA2	rs17579407	8	21270137	1000000000	1.05e-07	0	1.17e-40	6
PPARG	rs709165	3	12489124	38269	3.2e-38	1	4.04e-09	2
PPFIA1	rs531917	11	69902247	0	4.46e-22	1	3.53e-13	3
PPP1R16A	rs1480000	8	145672815	13414	2.24e-41	1	9.8e-08	1
PROCR	rs348400	5	100794703	1000000000	3.91e-07	0	6.83e-12	3
PSMD3	rs6970578	7	27810563	1000000000	3.23e-06	0	6.63e-07	1
PTER	rs7909832	10	16596716	974	0	1	3.18e-63	6
PXK	rs11713310	3	58296024	0	2.64e-24	1	1.27e-09	2
PYGB	rs6050598	20	25345257	118609	3.14e-89	1	3.44e-10	2
QRSL1	rs1026619	6	107221054	0	1.26e-39	1	3.42e-20	4
RAB15	rs2330607	5	30850387	1000000000	6.61e-07	0	7.07e-12	3
RAB24	rs10016149	4	160716641	1000000000	3.11e-06	0	1.49e-07	1
RAB24	rs10004343	4	160716610	1000000000	3.11e-06	0	1.49e-07	1
RAB31	rs212489	17	29754223	1000000000	1.77e-06	0	9.32e-21	5
RABEP1	rs1806261	17	5257732	30490	1.36e-37	1	1.4e-12	3
RABGEF1	rs12532675	7	65344249	498829	6.45e-32	1	1.97e-11	3
RABIF	rs7548762	1	89971197	111143514	3.92e-07	0	3.23e-08	1
RAD18	rs4381025	9	86386787	1000000000	2.54e-06	0	2.24e-15	3
RAD51C	rs1864754	17	54043788	81174	1.78950576923699e-320	1	1.76e-10	2
RALBP1	rs7241781	18	9478704	0	1.42e-25	1	2.61e-15	3
RAMP1	rs895572	2	238479991	0	1.15e-32	1	2.71e-20	4
RARRES2	rs798420	2	7896447	1000000000	3.04e-08	0	2.11e-15	3
RBM18	rs10760220	9	124065983	0	2.09e-47	1	8.88e-07	1
RBMS2	rs7313074	12	55440756	170881	1.22e-78	1	1.61e-25	5
RGS17	rs683039	6	153505608	11531	6.14e-08	1	8.41e-11	3
RNF8	rs195385	6	37441774	0	3.85e-09	1	1.98e-12	3
RNGTT	rs10944413	6	89689765	0	3e-08	1	1.96e-28	6
RPL12	rs2243906	9	129259490	5983	8.88e-18	1	1.46e-08	1
RPL13	rs12709088	16	88157713	364	2.38e-97	1	3.49e-15	3
RPL17	rs2309557	17	6105712	1000000000	3.63e-06	0	8.91e-07	1
RPL36AL	rs2985697	14	49162652	5553	1.17e-12	1	1.97e-22	5
RPL37A	rs17494468	2	217120227	45799	1.58e-21	1	9.38e-18	4
RPL8	rs11784860	8	145984603	1355	1.67e-47	1	1.1e-20	4
RPLP2	rs10819931	9	103230907	1000000000	8.37e-07	0	1.99e-10	2
RPS16	rs12579318	12	129161868	1000000000	2.62e-06	0	8.47e-21	5
RPS6KA1	rs1064196	1	26760179	0	2.24e-18	1	8.91e-12	3
RPS6KB2	rs7114510	11	66981170	21716	1.26e-39	1	1.03e-29	6
RRBP1	rs6080761	20	17577162	0	2.01e-15	1	3.2e-14	3
RY1	rs6738783	2	69974112	-999	2.32e-25	0	2.51e-11	3
S100A10	rs1385766	2	140987256	1000000000	5.29e-06	0	3.25e-17	4
S100A13	rs913860	1	151886751	13559	5.45e-80	1	2.58e-21	5
SCAND2	rs11073686	15	83085690	100441	1.38e-13	1	2.75e-10	2
SCLY	rs6765486	3	18791130	1000000000	6.84e-06	0	5.67e-15	3
SDCCAG3	rs1130635	9	138437690	12808	3.35e-75	1	6.17e-07	1
SDCCAG3	rs10747044	9	138438950	14068	3.35e-75	1	6.17e-07	1
SERF2	rs10853232	18	13373207	1000000000	1e-06	0	1.68e-11	3
SERPINB10	rs6103	18	59721483	4722	3.12e-134	1	6.94e-16	4
SF1	rs637332	11	64285326	3328	1.19e-58	1	5.94e-47	6
SFRS10	rs1097997	12	85079285	1000000000	8.93e-07	0	1.22e-19	4
SFXN2	rs184586	5	13648146	1000000000	2.14e-07	0	9.41e-31	6
SFXN2	rs183495	5	13643526	1000000000	2.14e-07	0	9.41e-31	6
SH3TC1	rs10897113	11	60312794	1000000000	1.42e-07	0	1.48e-14	3
SHMT1	rs8076336	17	18153339	18573	8.4e-108	1	1.9e-10	2
SIRT3	rs12518216	5	60953900	1000000000	1.67e-07	0	3.95e-16	4
SIRT4	rs5634	12	119247220	11790	1.37e-11	1	2.93e-11	3
SIVA	rs2494731	14	104308725	11689	5.02e-07	1	2.31e-21	5
SLAMF7	rs4286013	13	75755475	1000000000	4.83e-07	0	1.07e-08	1
SLC1A4	rs13027905	2	64985015	85083	1.33e-16	1	6.71e-15	3
SLC22A5	rs2631360	5	131735328	0	6.66e-85	1	2.12e-11	3
SLC23A1	rs1611699	6	29935732	1000000000	1.1e-08	0	3.53e-12	3
SLC25A16	rs12217591	10	69921293	0	4.88e-61	1	1.22e-14	3
SLC27A5	rs2827317	21	22562886	1000000000	4.61e-07	0	1.52e-20	4
SLC2A8	rs7047760	9	129214917	4962	4.89e-52	1	2.08e-09	2
SLC35A1	rs9444504	6	88237765	1649	5.41e-11	1	7.56e-08	1
SLC35A5	rs2638037	3	113735080	28505	1.22e-27	1	1.25e-16	4
SLC35F2	rs11747553	5	54805177	1000000000	2.53e-06	0	2.47e-11	3
SLC7A7	rs7157654	14	22352590	0	3.58e-16	1	4.44e-24	5
SMARCE1	rs11078951	17	36084941	27312	2.95e-66	1	1.87e-08	1
SMCR7	rs2963850	5	175007250	1000000000	1.1e-06	0	6.09e-07	1
SNAP29	rs2072514	22	19429478	113814	3.02e-144	1	1.32e-13	3
SNRPB2	rs2423995	20	16664075	0	2.67e-06	1	1.42e-11	3
SNX11	rs7220520	17	43522941	16978	6.31e-22	1	6.84e-25	5
SNX16	rs11987669	8	82933045	16055	9.76e-58	1	3.59e-15	3
SOD2	rs7855	6	160020292	0	3.88e-150	1	4.44e-10	2
SPATA5L1	rs2467864	15	43428390	53488	1.62e-62	1	1.48e-08	1
SPG7	rs3803676	16	88123607	0	1.08e-26	1	5.93e-24	5
SPI1	rs4992357	11	47350214	0	3.84e-38	1	1.19e-09	2
SPINT2	rs7253245	19	43445626	1416	3.34e-17	1	4.3e-17	4
SQSTM1	rs9476904	6	15859309	1000000000	3.9e-06	0	8.25e-27	6
SR140	rs6852766	4	66016285	-999	1.37e-06	0	1.36e-12	3
SRCRB4D	rs17314018	2	83245696	1000000000	2.04e-06	0	1.36e-08	1
SRP54	rs2295104	14	34649678	81156	5.14e-09	1	2.4e-06	1
SSBP4	rs592700	8	2853752	1000000000	3.15e-07	0	3.49e-08	1
ST7L	rs6666579	1	112933916	0	3.13e-76	1	1.93e-36	6
STAT6	rs324019	12	55772914	2548	6.87e-198	1	1.1e-16	4
STIM2	rs16828904	1	186770248	1000000000	4.01e-07	0	1.61e-12	3
STK25	rs3771561	2	242002377	80728	3.99e-07	1	9.9e-39	6
STXBP2	rs794084	19	7598058	9952	3.99e-23	1	3.45e-08	1
SUMF2	rs12668532	7	56004477	94934	3.49e-21	1	7.89e-14	3
SUPT3H	rs9349303	6	44900557	3890	1.99e-09	1	6.74e-16	4
SURF1	rs3124768	9	135294318	81136	5.03e-34	1	3.69e-20	4
SWAP70	rs93138	11	9716289	-999	5.94e-30	0	4.6e-08	1
SYNGR1	rs5750811	22	38123012	11475	8.13e-21	1	2.68e-36	6
SYTL2	rs1445497	11	85196233	49541	6.35e-16	1	1.64e-07	1
TAF1B	rs11686239	2	9963168	0	5.67e-20	1	6.29e-13	3
TAF4B	rs2515274	11	69652071	1000000000	7.45e-07	0	7.23e-12	3
TAS2R14	rs10772407	12	11037961	0	1.27e-08	1	4.13e-07	1
TBC1D7	rs2458307	6	13429835	0	5.05e-23	1	3.46e-12	3
TCFL5	rs4809261	20	60941170	1743	1.68e-70	1	2.57e-07	1
TCL1B	rs7838301	8	139575414	1000000000	8.28e-09	0	3.26e-42	6
TESK2	rs12743512	1	45726620	0	4.17e-09	1	3.86e-07	1
TH1L	rs6070706	20	57061634	58053	6.76e-28	1	9.96e-08	1
THAP6	rs1841932	4	76623783	34895	1.93e-49	1	6.13e-18	4
TIMM10	rs2581922	11	57021976	30538	0	1	9.36e-24	5
TIMM10	rs1846568	11	57114290	59482	0	1	9.36e-24	5
TIMM10	rs2649663	11	57113881	59073	0	1	9.36e-24	5
TIMM10	rs2729371	11	57077898	23090	0	1	9.36e-24	5
TIMM10	rs2649662	11	57109138	54330	0	1	9.36e-24	5
TIMM22	rs9896110	17	850569	0	4.21e-152	1	1.51e-09	2
TINP1	rs16872345	5	74185234	76744	8.13e-89	1	1.84e-11	3
TIRAP	rs587891	11	125586546	71646	2.37e-11	1	1.23e-24	5
TK2	rs725131	16	65143211	1395	7.35e-17	1	2.81e-15	3
TKT	rs728910	3	53240997	0	2.16e-18	1	1.14e-08	1
TLR1	rs13439585	8	69880596	1000000000	3.87e-06	0	1.54e-14	3
TLR10	rs10489811	1	119784626	1000000000	4.92e-06	0	5.63e-18	4
TLR6	rs5743592	4	38479458	25160	1.37e-08	1	2.54e-15	3
TMEM8	rs3830160	16	359093	2772	8.75e-78	1	1.21e-09	2
TNPO3	rs11768572	7	128432528	0	2.56e-32	1	2.09e-08	1
TOMM34	rs1998033	20	42992323	11863	2.4e-19	1	4.45e-20	4
TOP2B	rs215747	7	32423371	1000000000	1.76e-07	0	9.47e-16	4
TPCN2	rs4930265	11	68612530	0	5.5e-127	1	2.08e-22	5
TRAPPC4	rs10111	11	118391327	3124	3.63e-81	1	1.7e-12	3
TRERF1	rs77522	6	42392075	0	1.02e-07	1	1.29e-07	1
TRIM38	rs1878929	9	108917411	1000000000	8.99e-07	0	2.84e-08	1
TRIM4	rs2247761	7	99338847	0	5.55e-225	1	3.43e-28	6
TSG101	rs4862411	4	185901768	1000000000	5.41e-06	0	4.28e-14	3
TSGA10	rs12613624	2	99099173	0	3.78e-82	1	4.67e-26	6
TSGA10	rs1133977	2	99108416	0	3.78e-82	1	4.67e-26	6
TUBB	rs3094127	6	30805426	4244	5.29e-13	1	2.7e-19	4
TUBGCP5	rs755982	8	118643130	1000000000	7.05e-15	0	4.22e-16	4
TXNDC5	rs4934881	10	37954352	1000000000	1.57e-06	0	2.76e-12	3
UBE3B	rs3815575	12	108432288	0	1.23e-10	1	1.2e-06	1
UBQLN1	rs10763078	10	55600353	1000000000	1.41e-07	0	2.65e-09	2
UGCGL1	rs187462	5	109016440	1000000000	1.21e-07	0	7.64e-08	1
UROS	rs2027515	10	127485822	0	2.43e-14	1	9.29e-14	3
USMG5	rs1163073	10	105012924	125864	0	1	2.17e-40	6
USMG5	rs2271751	10	105165121	18908	0	1	2.17e-40	6
USP36	rs3744800	17	74305420	0	4.34e-260	1	3.55e-12	3
VAMP1	rs2534717	12	6444010	0	3.16e-99	1	1.97e-09	2
VPS13A	rs2642589	10	71183653	1000000000	1.17e-06	0	2.72e-19	4
VPS33A	rs16974233	15	89466689	1000000000	5.85e-07	0	2.02e-14	3
VRK2	rs12713377	2	58325614	85109	1.65e-14	1	3.83e-13	3
WARS2	rs1325939	1	119385491	0	3.49e-120	1	1.14e-13	3
WBSCR27	rs8629	7	72883455	3407	3.04e-123	1	8.84e-45	6
WDR18	rs12710103	19	964634	19065	1.79e-12	1	6.37e-09	2
WWOX	rs1864899	3	71519392	1000000000	6.69e-08	0	6.37e-09	2
XPC	rs1975192	3	349788	13811863	2.08e-06	0	4.41e-13	3
XRCC1	rs2030404	19	48735288	4016	8.07e-34	1	3.81e-12	3
XYLB	rs1875196	5	1744202	1000000000	1.35e-08	0	1.04e-09	2
ZDHHC2	rs4677181	3	72659578	1000000000	6.11e-10	0	7.24e-08	1
ZFP161	rs9945680	18	5284323	0	2.96e-21	1	4.71e-09	2
ZFYVE19	rs3743034	15	38888437	0	1.52e-22	1	2.47e-09	2
ZFYVE21	rs11645153	16	81676584	1000000000	5.72e-06	0	1.7e-08	1
ZMYND12	rs4622104	1	42750829	56304	2.69e-57	1	5.7e-09	2
ZMYND12	rs12402795	1	42718277	23752	2.69e-57	1	5.7e-09	2
ZNF132	rs4801583	19	63610217	25777	1.34e-10	1	2.85e-10	2
ZNF160	rs329719	19	58280861	0	3.53e-08	1	4.06e-22	5
ZNF175	rs1585160	19	56750466	15877	5.2e-34	1	1.33e-10	2
ZNF211	rs10409262	19	62846767	820	5.8e-14	1	9.66e-13	3
ZNF213	rs11649450	16	3121997	3143	6.07e-25	1	6.97e-12	3
ZNF264	rs2193230	2	217343391	1000000000	5.19e-06	0	5.38e-07	1
ZNF266	rs7246415	19	9395981	0	4.06e-88	1	1.14e-26	6
ZNF283	rs4922060	8	19452788	1000000000	1.05e-06	0	4.37e-07	1
ZNF493	rs1533674	19	21569306	167182	1.99e-78	1	7.6e-23	5
ZNF586	rs9304805	19	63000426	0	1.24e-27	1	5.11e-14	3
ZNF587	rs1507417	3	78733335	1000000000	2.43e-07	0	6.41e-13	3
ZNF589	rs6796490	3	48212108	45492	8.84e-34	1	8.57e-11	3
ZNF71	rs9314453	8	2084414	1000000000	4.4e-09	0	1.54e-06	1
ZNF79	rs7869823	9	129241910	0	2.52e-25	1	9.43e-20	4
ZNF79	rs2247573	9	129250767	3296	2.52e-25	1	9.43e-20	4
ZNF79	rs7853047	9	129237921	0	2.52e-25	1	9.43e-20	4
ZNF79	rs7869023	9	129241499	0	2.52e-25	1	9.43e-20	4
ZNF85	rs17618127	19	20928675	3334	1.29e-35	1	1.46e-09	2
ZNRD1	rs7742712	6	30079056	57957	1.6e-16	1	3.44e-16	4
