# Supplementary material for: Genetics and Beyond – The Transcriptome of Human Monocytes and Disease Susceptibility
Source: PLoS One. 2010 May 18;5(5):e10693. doi: 10.1371/journal.pone.0010693 (PMC2872668; doi:10.1371/journal.pone.0010693)
Supplement: File S3 — Comparison cis eQTL in GHS and the study of Dixon et al. (0.14 MB XLS) [file pone.0010693.s008.xls]

## Sheet: Supplementary file 3. Compariso
	GHS				GHS	GHS	Dixon	Dixon
eQTL name	Best cis eSNP	Chrom	Position	SNP-eQTL distance	P-value	Significance	P-value	P-value class
ABHD10	rs812149	3	113180431	158	1.17e-51	1	5.9e-09	2
ABHD4	rs970348	14	22139693	0	1.27e-06	1	2.8e-10	2
ABHD6	rs6445960	3	58196972	1377	8.39e-13	1	5.5e-08	1
ACBD3	rs9729045	1	224429606	0	7.4e-13	1	1.2e-07	1
ACOX1	rs8065144	17	71471452	0	2.42e-23	1	8.9e-10	2
ACOX3	rs3756187	4	8429232	0	6.67e-27	1	2.2e-09	2
ACP6	rs1344	1	145585897	0	7.94e-13	1	3.4e-22	5
ACTA2	rs1926196	10	90743728	41219	0	1	2.9e-14	3
ACTA2	rs7097572	10	90743240	40731	0	1	2.9e-14	3
ACTR2	rs212489	17	29754223	1000000000	4.13e-07	0	8.9e-11	3
ADAM17	rs1862370	5	164844511	1000000000	4.8e-06	0	1e-15	4
AGA	rs2271101	4	178596713	0	4.58e-135	1	1.1e-14	3
AGMAT	rs2362692	3	198810820	1000000000	4.62e-08	0	2.1e-14	3
AHI1	rs7750586	6	135869366	0	1.42e-49	1	7.2e-23	5
AHSA2	rs4671398	2	61294011	24447	3.46e-76	1	1.4e-14	3
AIF1	rs295073	17	29804689	1000000000	2.16e-06	0	3.7e-12	3
AIM1	rs12528406	6	107147668	22640	1.04e-13	1	8.8e-34	6
AIM2	rs1935067	1	157316727	3547	6.8e-17	1	1.1e-08	1
AKAP10	rs203457	17	19758930	0	8.01e-66	1	3e-18	4
AKAP13	rs3848651	19	16658380	1000000000	6.67e-06	0	1.7e-18	4
AKAP9	rs1712790	11	114126679	1000000000	1.96e-08	0	3.6e-23	5
ALDH3A2	rs11871420	17	19483754	8887	7.9e-07	1	8.1e-18	4
ALDH7A1	rs17154676	5	125940019	0	9.71e-65	1	7.5e-17	4
ALDH8A1	rs4472368	6	135315925	2988	9.78e-30	1	1.2e-18	4
AMACR	rs168803	5	34031462	0	1.74e-30	1	9.3e-14	3
AMFR	rs2440467	16	54974548	0	4.21e-149	1	8.7e-40	6
AMFR	rs2587873	16	54970235	0	4.21e-149	1	8.7e-40	6
AMPH	rs7540438	1	202545650	1000000000	1.75e-07	0	7.2e-10	2
ANAPC13	rs10935120	3	135715782	28263	2.1e-105	1	5.2e-18	4
ANKH	rs6013794	20	51829809	1000000000	2.38e-06	0	3.8e-17	4
ANKRD10	rs9521981	13	110342843	0	3.93e-23	1	8.2e-15	3
ANKRD11	rs2479516	13	105315123	1000000000	1.41e-06	0	7.9e-19	4
ANKRD28	rs12485738	3	56840816	40964759	1.02e-09	0	9e-21	5
ANKRD44	rs12303498	12	3281699	1000000000	3.05e-06	0	4.5e-09	2
ANP32A	rs6720312	2	26218438	1000000000	9.9e-08	0	1.3e-07	1
ANP32B	rs17798991	18	45375314	1000000000	9.76e-07	0	4.8e-08	1
ANXA5	rs1480287	4	122821231	0	1.08e-15	1	2.6e-11	3
ANXA6	rs28705982	5	150494040	0	1.57e-59	1	1.7e-18	4
AP3S2	rs7173483	15	88172552	5241	7.78e-48	1	3e-25	5
AP4M1	rs4729568	7	99477381	59685	3.04e-29	1	7.9e-12	3
APOBEC3C	rs5750735	22	37779601	34834	1.58e-17	1	2.6e-09	2
ARFGEF2	rs7274612	20	47136228	49599	4.49e-14	1	1.1e-29	6
ARHGAP24	rs4693120	4	86773310	0	2.11e-19	1	8.1e-13	3
ARID1B	rs7295791	12	84646995	1000000000	2.61e-06	0	7.9e-13	3
ARID1B	rs10779197	12	84649495	1000000000	2.61e-06	0	7.9e-13	3
ARID3A	rs6661170	1	7240246	1000000000	6.26e-08	0	1.1e-14	3
ARID5B	rs7734618	5	75069518	1000000000	4.98e-06	0	2.7e-09	2
ARL11	rs10265758	7	1139044	1000000000	1.32e-08	0	2.7e-15	3
ARL6IP2	rs9466363	6	22562200	1000000000	2.35e-06	0	1.2e-09	2
ARNT	rs10509990	10	115591547	1000000000	1.89e-06	0	8.3e-18	4
ARSA	rs6151429	22	49410343	0	1.16e-143	1	4.5e-09	2
ASAHL	rs17221100	4	77042249	15400	1.29e-98	1	1.4e-23	5
ASRGL1	rs1406384	11	61840106	21244	2.48e-83	1	2.3e-20	4
ATF5	rs264174	18	10888905	1000000000	1.99e-07	0	2.6e-08	1
ATF6	rs12405111	1	160058351	0	1.19e-15	1	1.8e-08	1
ATG10	rs11741569	5	81361666	0	4.7e-08	1	2.9e-09	2
ATP1B3	rs6719481	2	4787314	1000000000	8.95e-07	0	6.3e-08	1
ATP5C1	rs1731422	12	42562636	1000000000	1.32e-07	0	3.3e-17	4
ATP5O	rs2309557	17	6105712	1000000000	3.66e-07	0	2e-10	2
ATP5S	rs7161563	14	49868876	0	4.95e-13	1	8.7e-10	2
ATP6V1E2	rs12997164	2	46612250	0	7.11e-94	1	8.6e-09	2
ATP7A	rs4540486	9	29456012	1000000000	5.86e-08	0	7.4e-20	4
ATP8A1	rs2130789	10	122842419	1000000000	1.36e-06	0	1.7e-27	6
ATXN1	rs7217291	17	35476521	1000000000	2.9e-07	0	2.1e-26	6
AVEN	rs6889467	5	174509846	1000000000	6.16e-08	0	6.2e-09	2
B3GALNT2	rs1305556	1	233695531	0	2.63e-76	1	4.8e-10	2
B4GALT1	rs2320704	17	36869020	1000000000	8.04e-07	0	8e-21	5
BAMBI	rs4147391	14	35457435	1000000000	1.37e-07	0	5.3e-11	3
BAZ2A	rs2909218	17	63976141	1000000000	2.2e-08	0	2.6e-18	4
BBS2	rs13337155	16	55062225	13576	3.19e-135	1	2.7e-21	5
BCAS4	rs6474941	9	15651859	1000000000	8.93e-07	0	3.6e-11	3
BCR	rs131686	22	21976953	0	1.12e-76	1	4.3e-11	3
BEXL1	rs5945946	23	102287570	-999	1.11e-86	0	1.9e-15	3
BEXL1	rs5945946	23	102287570	-999	3.4e-23	0	1.9e-15	3
BICD1	rs1716960	12	32141426	10022	3.46e-07	1	5.4e-10	2
BID	rs5747338	22	16594609	2299	5.24e-29	1	7e-11	3
BIN1	rs9653202	2	127583577	2243	2.31e-104	1	4.5e-13	3
BLK	rs2736340	8	11381382	7548	2.08e-23	1	8.9e-27	6
BMP8B	rs17579407	8	21270137	1000000000	1.69e-06	0	4e-30	6
BRE	rs9386509	6	106624930	1000000000	1.59e-06	0	1e-16	4
BRWD2	rs6585674	10	122648007	0	7.97e-271	1	2.9e-16	4
BRWD2	rs10886788	10	122610241	0	7.97e-271	1	2.9e-16	4
BRWD2	rs3758507	10	122612828	0	7.97e-271	1	2.9e-16	4
BTN3A1	rs2237236	6	26559532	36111	1.97e-16	1	9.2e-13	3
BTN3A2	rs9358932	6	26470684	2693	2.98e-154	1	2.3e-28	6
BTN3A2	rs9379851	6	26462759	10618	2.98e-154	1	2.3e-28	6
BTN3A3	rs12898166	14	91102508	1000000000	8.15e-07	0	1.1e-27	6
BTNL9	rs6001362	22	20891758	1000000000	1.04e-10	0	7.1e-12	3
CAB39L	rs326841	4	112964283	1000000000	1.3e-08	0	2.6e-08	1
CACNA1D	rs13076812	3	64393081	10572080	2.24e-07	0	5.4e-10	2
CALM2	rs12693762	2	154137008	106879854	3.02e-06	0	1.6e-09	2
CAMKK2	rs11065504	12	120164843	0	2.4e-107	1	2e-19	4
CAND1	rs17695140	8	18510310	1000000000	3.91e-07	0	5.6e-08	1
CAP1	rs10190454	2	70693610	1000000000	9.71e-07	0	2.2e-13	3
CAPG	rs17026285	2	85470269	5113	8.16e-33	1	8.2e-08	1
CARD8	rs1062808	19	53403288	37	4.99e-197	1	1e-13	3
CARD9	rs4266763	9	138409646	21692	2.9e-79	1	8.1e-15	3
CASP1	rs12954862	18	69513803	1000000000	2.73e-06	0	1.1e-07	1
CASP4	rs11761829	7	36523222	1000000000	1.95e-06	0	3.6e-08	1
CAT	rs494024	11	34421324	0	3.44e-33	1	3.8e-13	3
CAV2	rs760444	7	115784092	142588	3.86e-41	1	1.1e-15	3
CBX5	rs4833724	4	122620012	1000000000	5.88e-06	0	1.6e-11	3
CC2D1B	rs9633423	1	52608727	4275	4.09e-60	1	2e-12	3
CCDC32	rs10851396	15	38648211	3667	9.1e-50	1	8.6e-29	6
CCHCR1	rs2468701	8	140616922	1000000000	8.87e-06	0	5.5e-23	5
CCND1	rs10974689	9	4624827	1000000000	4.97e-07	0	2.6e-10	2
CCND2	rs10265509	7	147446596	1000000000	2.87e-06	0	6.1e-10	2
CCS	rs580910	11	66158909	28844	1.67e-78	1	1.6e-16	4
CCT5	rs699113	5	10318076	0	9.99e-64	1	2.5e-09	2
CCT5	rs2662532	5	10320090	589	9.99e-64	1	2.5e-09	2
CCT8	rs2832159	21	29380435	12446	8.89e-12	1	9.8e-23	5
CCT8	rs2832160	21	29381115	13126	8.89e-12	1	9.8e-23	5
CD151	rs5030780	11	828110	0	1.31e-155	1	9.1e-18	4
CD244	rs952804	1	159111369	12053	1.09e-08	1	1e-15	4
CD47	rs1006044	3	109239776	4855	2.71e-12	1	1.2e-25	5
CD52	rs17163749	1	26440752	76246	2.32e-189	1	2.1e-08	1
CD59	rs1190850	14	100133937	1000000000	1.81e-07	0	1.2e-09	2
CD69	rs16862933	1	168252420	1000000000	3.48e-07	0	2.2e-10	2
CDC14B	rs12485738	3	56840816	1000000000	5.06e-27	0	1.1e-09	2
CDC2	rs6733455	2	42203991	1000000000	5.64e-07	0	4.1e-08	1
CDC42	rs295067	17	29808459	1000000000	3.11e-07	0	6.3e-37	6
CDC42SE1	rs6674970	1	149382903	84154	2.14e-22	1	3e-09	2
CDC42SE2	rs4492104	5	131117166	358887	1.02e-24	1	8.2e-33	6
CDCP1	rs11708336	3	45168460	5542	2.12e-09	1	7e-12	3
CDK5RAP2	rs1547266	9	122203297	0	1.54e-142	1	1.5e-15	3
CDKAL1	rs10946439	6	21342013	1399	3.66e-13	1	5.2e-18	4
CEACAM21	rs9304595	19	46769831	0	1.62e-09	1	7.2e-18	4
CEBPZ	rs11124574	2	37352793	40545	7.17e-08	1	1e-08	2
CECR5	rs5747008	22	16003408	0	1.16e-10	1	7.6e-08	1
CFL2	rs6736638	2	64806834	1000000000	7.54e-08	0	5.3e-12	3
CFLAR	rs17171966	7	41892677	1000000000	7.92e-07	0	2.9e-08	1
CGI-96	rs4822146	22	41240713	-999	3.16e-228	0	8.9e-17	4
CHD1L	rs6689252	1	145050644	130271	3.58e-07	1	1.2e-09	2
CHD2	rs1345459	8	5107885	1000000000	7.53e-08	0	1.8e-09	2
CHI3L2	rs639210	1	111544284	27520	2.34e-51	1	1.9e-30	6
CHKB	rs12545664	8	119411713	1000000000	1.32e-06	0	4e-08	1
CHPT1	rs2695284	12	100613449	2099	2.7e-33	1	3e-18	4
CHST11	rs6719279	2	240169815	1000000000	2.6e-08	0	1.8e-13	3
CHURC1	rs1957425	14	64428329	22564	0	1	9.6e-51	6
CHURC1	rs10151701	14	64448202	2691	0	1	9.6e-51	6
CHURC1	rs10144942	14	64424795	26098	0	1	9.6e-51	6
CHURC1	rs12590986	14	64427445	23448	0	1	9.6e-51	6
CHURC1	rs10498518	14	64427295	23598	0	1	9.6e-51	6
CHURC1	rs2412065	14	64477410	5744	0	1	9.6e-51	6
CIB2	rs11067577	12	114328462	1000000000	1.63e-07	0	2.2e-08	1
CLDN20	rs6535206	4	138409844	1000000000	4.63e-07	0	1.4e-08	1
CLK4	rs12514827	5	178022706	36046	1.68e-07	1	1.6e-25	5
CMAH	rs9393617	6	25226036	0	4.79e-14	1	6e-24	5
CNDP2	rs3829640	18	70325960	0	5.25e-50	1	9.4e-12	3
CNOT6L	rs6533239	4	78880710	0	2.97e-06	1	2e-15	3
COG7	rs628949	13	100499765	1000000000	8.05e-07	0	2.7e-11	3
COL9A3	rs7978229	12	127325062	1000000000	4.06e-07	0	4.3e-08	1
COMMD2	rs6796427	3	150954790	1822	2.09e-159	1	4.5e-09	2
COX15	rs17140077	10	6758311	94703285	2.7e-07	0	2.2e-14	3
CP110	rs7295633	12	3297087	-999	4.74e-07	0	4.8e-10	2
CPEB4	rs1564823	5	173315800	0	5.19e-66	1	9.4e-14	3
CPEB4	rs1484803	5	173282446	0	5.19e-66	1	9.4e-14	3
CPEB4	rs966544	5	173283011	0	5.19e-66	1	9.4e-14	3
CPNE1	rs6060578	20	33768859	52597	1.38e-157	1	1.3e-33	6
CPSF6	rs10020717	4	126748390	1000000000	1.25e-08	0	3.7e-11	3
CPT1A	rs4930597	11	68232587	46079	1.35e-61	1	6.5e-08	1
CRAT	rs6478867	9	130943744	30840	5.88e-10	1	6.1e-09	2
CREM	rs7866267	9	98989731	1000000000	3.98e-07	0	4.3e-10	2
CRIM1	rs2355195	2	52151396	15519615	3e-08	0	1.2e-10	2
CRSP6	rs12892344	14	89728563	1000000000	1.01e-08	0	1.1e-07	1
CRYBB2	rs1930961	22	24205265	247429	2.95e-247	1	5.4e-08	1
CRYZ	rs405445	1	74993738	22405	4.12e-262	1	3.6e-13	3
CSTB	rs1573336	21	44064565	43878	6.26e-07	1	3.2e-17	4
CTBP1	rs2878539	4	1233877	969	7.76e-11	1	1e-28	6
CTNNA1	rs1651358	5	138108906	8100	1.15e-63	1	1.2e-08	1
CTPS	rs12403975	1	41194097	23854	2.36e-15	1	1.3e-08	1
CTSB	rs10089520	8	11723498	13944	1.59e-32	1	1.9e-11	3
CTSH	rs3825932	15	77022501	0	1.25e-28	1	4.2e-23	5
CTSS	rs17658705	1	148944695	24480	3.57e-33	1	5.8e-24	5
CUGBP2	rs2709803	7	30477059	1000000000	2.46e-06	0	5.8e-15	3
CUL2	rs6935927	6	154602029	1000000000	1.5e-06	0	3.5e-08	1
CXCL10	rs4422436	4	77196808	33134	7.3e-16	1	2.4e-18	4
CYBB	rs4747928	10	11801904	1000000000	1.28e-06	0	3.5e-08	1
CYBRD1	rs2674502	2	172134606	11723	6e-28	1	8.4e-10	2
CYCS	rs12328759	2	40961021	1000000000	1.37e-06	0	6.9e-12	3
CYFIP1	rs17047337	2	56020448	1000000000	2.44e-06	0	1.7e-08	1
CYP4V2	rs4253332	4	187416797	45192	2.27e-66	1	1.3e-19	4
DAAM1	rs10083442	14	58900633	0	8.63e-72	1	3e-46	6
DAPP1	rs33955417	6	3582573	1000000000	5.72e-07	0	8.5e-10	2
DCP2	rs7701781	5	112375727	0	3.29e-21	1	2e-09	2
DCPS	rs11220426	11	125630364	48493	3.49e-08	1	1.6e-08	1
DCTN5	rs42873	16	23602233	13550	2.9e-34	1	7.1e-14	3
DDI2	rs4702271	5	5544290	1000000000	4.01e-06	0	2.1e-24	5
DDX58	rs7022554	9	32426014	19286	6.81e-24	1	6.9e-42	6
DDX6	rs1331457	9	2444963	1000000000	1.11e-07	0	1.6e-12	3
DFNA5	rs1476520	7	24762754	0	1.86e-306	1	4.7e-18	4
DGCR8	rs9606240	22	18451423	0	1.12e-67	1	7.2e-12	3
DGKD	rs16950539	16	50512866	1000000000	2.51e-06	0	4.3e-11	3
DGKD	rs12927785	16	50513704	1000000000	2.51e-06	0	4.3e-11	3
DGKD	rs16950536	16	50512714	1000000000	2.51e-06	0	4.3e-11	3
DGKE	rs6503774	17	52273839	0	3.95e-17	1	3e-12	3
DGKQ	rs6813110	4	932660	10016	1.14e-81	1	7.3e-16	4
DHFR	rs836823	5	79979470	1000000000	3.72e-25	0	2.7e-10	2
DHRS1	rs11627152	14	23821433	8213	9.86e-24	1	2e-08	1
DHX30	rs1058348	10	11342351	1000000000	1.28e-06	0	1.3e-08	1
DKFZP564O0823	rs3796683	4	76190788	-999	3.42e-09	0	7.5e-10	2
DNAJC15	rs17553846	13	42511458	0	6.11e-181	1	7.9e-26	6
DNAJC18	rs1702524	18	71887549	1000000000	5.44e-07	0	9.9e-14	3
DNASE1L3	rs4681818	3	58159891	0	5.84e-28	1	1.2e-13	3
DOCK7	rs995000	1	62880114	0	1.36e-52	1	3.1e-22	5
DPYSL4	rs4880341	10	133842679	7715	7.43e-41	1	2.4e-24	5
DSC2	rs1041676	1	71877035	1000000000	2.17e-06	0	4.3e-09	2
DSC3	rs17039902	4	110272302	1000000000	4.84e-07	0	8.7e-09	2
DSTN	rs6080761	20	17577162	40510	8e-42	1	1.1e-09	2
DTNB	rs12769875	10	2440019	1000000000	1.82e-07	0	2.3e-35	6
DUS3L	rs2446195	19	5744704	2510	1.78e-37	1	1.5e-09	2
DUSP14	rs853191	17	32895871	28193	6.8e-73	1	1.1e-17	4
EAF2	rs1807354	16	10194207	1000000000	4.83e-08	0	2e-15	3
EBPL	rs9568313	13	49189612	26000	2.79e-49	1	4.3e-17	4
EBPL	rs9526596	13	49220334	56722	2.79e-49	1	4.3e-17	4
ECHDC2	rs481440	1	53117564	16928	3.79e-173	1	4.7e-08	1
ECHDC3	rs3829154	10	11822759	1603	3.13e-141	1	3.5e-14	3
EIF2AK1	rs17690697	17	20746376	1000000000	2.74e-06	0	4e-36	6
EIF2AK4	rs13162885	5	5913075	1000000000	2.32e-06	0	1.4e-20	4
EIF2S3	rs10112030	8	6668233	1000000000	4.86e-06	0	2.9e-12	3
EIF5A	rs4796398	17	7148921	2169	1.29e-236	1	9.5e-43	6
ELL2	rs154448	5	95224109	22451	1.96e-06	1	1.4e-19	4
EMR1	rs330886	19	6851830	0	1.06e-36	1	8.5e-22	5
EMR2	rs3795033	19	14736917	0	6.23e-46	1	4.4e-10	2
ENC1	rs6886768	5	73963526	0	5.8e-104	1	2.4e-23	5
ENDOG	rs2997913	9	130628854	4078	3.72e-33	1	6.1e-08	1
ENOSF1	rs3786347	18	733226	30584	1.68e-63	1	1.6e-10	2
ENTPD1	rs4396219	10	97551931	0	3.38e-18	1	7.7e-29	6
EPS15	rs6659736	1	51586862	5661	4.11e-07	1	3.1e-10	2
EPSTI1	rs9315980	13	42472028	7651	1.03e-13	1	3.8e-11	3
ERO1L	rs3783449	14	52224100	0	2.33e-24	1	1.3e-12	3
ERO1LB	rs1749556	1	234454121	0	9.41e-09	1	9.3e-25	5
ESR2	rs1380631	4	137907441	1000000000	2.71e-06	0	3.7e-11	3
ETHE1	rs17078137	13	22539168	1000000000	3.27e-07	0	5.6e-10	2
ETV6	rs963607	1	176446880	1000000000	5.55e-06	0	7.7e-24	5
EXOSC7	rs2056321	3	45058137	30171	3.47e-73	1	5.6e-08	1
EXT1	rs4887342	15	86324120	1000000000	2.13e-06	0	2.2e-15	3
F11R	rs1602160	6	94277193	1000000000	3.91e-07	0	1.7e-19	4
F13A1	rs12485738	3	56840816	1000000000	1.21e-12	0	5.1e-09	2
FADS1	rs11134918	5	174650311	1000000000	5.48e-06	0	8.9e-09	2
FAM14B	rs10253606	7	98129680	1000000000	3.89e-07	0	1.4e-07	1
FAM38B	rs11622332	14	36159780	1000000000	1.53e-06	0	1.5e-10	2
FAM44A	rs874659	20	12005659	1000000000	1.02e-07	0	1.4e-27	6
FANCA	rs10809254	9	10942730	1000000000	9.92e-07	0	1.3e-13	3
FBXL5	rs6659595	1	243882719	1000000000	1.99e-06	0	1e-12	3
FBXO31	rs745280	16	85954789	0	5.33e-73	1	3.7e-08	1
FCGR2A	rs8131431	21	18056730	1000000000	1.15e-06	0	5.4e-08	1
FGD2	rs864396	6	37110249	40316673	1.03e-84	0	1.5e-11	3
FGF2	rs3922637	4	134598520	10559680	1.62e-06	0	3.6e-14	3
FHL1	rs12485738	3	56840816	1000000000	4.97e-20	0	2.3e-09	2
FKBP1A	rs295073	17	29804689	1000000000	3.4e-08	0	4.9e-10	2
FNBP4	rs4956165	4	109367280	1000000000	5.93e-06	0	1.1e-22	5
FTSJ3	rs17035177	1	116381302	1000000000	1.32e-06	0	1.6e-13	3
FTSJ3	rs10923960	1	116378633	1000000000	1.32e-06	0	1.6e-13	3
FUCA1	rs9424398	1	24094421	27013	6.75e-42	1	9.5e-09	2
FUSIP1	rs3211051	1	24160991	2890	4.43e-16	1	1.2e-15	3
FYB	rs36862	7	14937047	1000000000	3.2e-08	0	6e-15	3
FZD3	rs1235554	21	40266435	1000000000	3.65e-06	0	8.6e-15	3
GAB2	rs2450130	11	77621105	0	2.2e-08	1	1.3e-07	1
GALNT10	rs7701541	5	153534636	15852	8.87e-09	1	3.3e-08	1
GALNT10	rs890797	5	153531070	19418	8.87e-09	1	3.3e-08	1
GALNT10	rs6580058	5	153558112	0	8.87e-09	1	3.3e-08	1
GAS6	rs4839053	1	110912672	1000000000	9.45e-07	0	2.1e-19	4
GBP3	rs10493821	1	89247723	0	4.44e-65	1	1.6e-21	5
GCSH	rs10116392	9	123613446	1000000000	1.18e-07	0	8.7e-14	3
GDI2	rs6465819	7	101001016	1000000000	5.96e-07	0	7.7e-14	3
GIMAP4	rs1916001	7	149884963	10428	5.89e-26	1	9.7e-13	3
GIMAP8	rs7810209	7	149784746	0	8.71e-18	1	4.2e-12	3
GLDC	rs1260460	9	6621099	0	4.58e-10	1	1.3e-09	2
GLIPR1	rs1073416	7	78433793	1000000000	1.67e-06	0	2.4e-14	3
GM2A	rs10476969	5	150642499	13499	1.49e-15	1	8.4e-08	1
GNA12	rs1344142	3	56832473	1000000000	1.56e-11	0	5.3e-18	4
GNAI3	rs6663547	1	109915752	0	9.01e-95	1	3.9e-11	3
GNAS	rs7274469	20	1867324	54980844	8.21e-07	0	6.3e-10	2
GNAS	rs7274469	20	1867324	54994107	8.21e-07	0	6.3e-10	2
GNG2	rs13147287	4	115554068	1000000000	1.45e-06	0	7.4e-10	2
GNPDA2	rs1491322	4	44358409	40517	1.02e-06	1	3.4e-28	6
GOLPH4	rs7634939	3	169208102	1823	6.31e-27	1	3.3e-16	4
GOLPH4	rs7632500	3	169208043	1882	6.31e-27	1	3.3e-16	4
GPM6A	rs2126029	4	115733875	61057208	1.16e-06	0	5.2e-08	1
GPR108	rs1097997	12	85079285	1000000000	1.17e-07	0	4.9e-11	3
GPR63	rs10239038	7	15400590	1000000000	1.26e-06	0	7.3e-16	4
GPX7	rs835342	1	52836622	4010	5.21e-150	1	1.3e-21	5
GRHPR	rs7856656	9	37411065	1598	3.89e-182	1	6.8e-08	1
GRK4	rs2471336	4	2967409	0	6.82e-33	1	5.7e-14	3
GSDMDC1	rs6991958	8	144695581	16054	3.26e-22	1	2.4e-08	1
GSTM1	rs11807	1	110062265	24375	4.16e-50	1	3.9e-10	2
GSTM2	rs10857796	1	110036555	0	1.25e-44	1	3.4e-10	2
GSTM3	rs1887547	1	110097295	12112	4.12e-30	1	1.4e-34	6
GSTM4	rs1799875	1	109950497	49729	1.33e-58	1	3.2e-10	2
GSTT1	rs5760176	22	22732321	18050	2.63648991688733e-317	1	1.2e-41	6
GTF2A2	rs12425761	12	114119258	1000000000	3.16e-07	0	1.2e-09	2
GTF3C4	rs7577253	2	82562464	1000000000	1.38e-07	0	4.5e-11	3
GTPBP5	rs2440393	8	6319564	1000000000	4.46e-08	0	1.2e-28	6
GUSBL2	rs17061232	3	59780018	1000000000	2.48e-07	0	5.9e-13	3
H6PD	rs7517538	1	9255290	1307	9.18e-19	1	3.5e-08	1
HADHA	rs4665318	2	26278021	0	1.38e-21	1	1.3e-10	2
HBS1L	rs4472368	6	135315925	7293	1.49e-13	1	7.8e-26	6
HCG27	rs3130501	6	31244432	29084	1.33e-69	1	6.9e-11	3
HDDC2	rs2243390	6	125663317	0	5.42e-145	1	5.1e-12	3
HDDC2	rs2243389	6	125663344	0	5.42e-145	1	5.1e-12	3
HDGFRP3	rs6859750	5	108069506	-999	3.93e-07	0	4.1e-10	2
HEATR1	rs2185836	1	188349217	46431377	4.89e-07	0	3.7e-13	3
HEBP2	rs1928278	6	138760216	6813	5.83e-12	1	1.8e-21	5
HELB	rs17106495	10	82275513	1000000000	2.39e-08	0	1.1e-36	6
HIBADH	rs12540821	7	27696718	27591	1.83e-14	1	1.9e-13	3
HIBCH	rs2136569	2	190875659	0	2.26e-45	1	8.1e-11	3
HLA-B	rs6927444	6	31300826	43679	1.38e-15	1	5.3e-08	1
HLA-C	rs4394274	6	31426143	-999	2.64e-158	0	2.3e-11	3
HLA-DOA	rs447088	6	33087958	2591	9.19e-23	1	2.1e-08	1
HLA-DPA1	rs2856816	6	33153478	0	8.04e-10	1	1.9e-29	6
HLA-DPB1	rs3128963	6	33163758	0	3.24e-145	1	8.8e-19	4
HLA-DQA1	rs9272219	6	32710247	2865	2.55e-189	1	2.8e-39	6
HLA-DQB1	rs9272346	6	32712350	22872	0	1	9.8e-29	6
HLA-DRB6	rs4410767	6	32556107	-999	2.11e-209	0	1.3e-13	3
HNRPH1	rs4078141	5	178984144	868	9.73e-33	1	2e-12	3
HOXB2	rs12939811	17	43962957	12063	2.01e-204	1	7.9e-10	2
HPS3	rs12508045	4	75813257	1000000000	3.56e-07	0	1.6e-26	6
HPSE	rs4693083	4	84460340	0	2.79e-80	1	7.5e-08	1
HPSE	rs11099594	4	84459871	0	2.79e-80	1	7.5e-08	1
HRASLS3	rs7101608	11	63128296	0	9.91e-255	1	1.5e-13	3
HSD17B12	rs11037654	11	43785335	0	1.86e-12	1	4.6e-26	6
HSPC152	rs1544538	11	63744916	-999	7.21e-09	0	6.4e-09	2
IFI44	rs11145974	9	138436565	1000000000	3.73e-07	0	3.8e-12	3
IFNAR2	rs6776326	3	6256402	1000000000	8.04e-06	0	7.5e-14	3
IL16	rs4778636	15	79378694	0	7.92e-64	1	1.5e-10	2
IL1B	rs491461	7	49826841	1000000000	1.41e-06	0	1.2e-07	1
IMMP2L	rs37715	7	110666487	0	2.03e-67	1	6.2e-12	3
IMMT	rs12477274	2	86252296	0	1.09e-11	1	6.5e-19	4
IMPA1	rs10046697	8	82627461	105290	4.09e-42	1	7.9e-12	3
INPP1	rs3791815	2	190927859	0	7.83e-10	1	3.6e-14	3
INPP5E	rs10781538	9	138440750	2146	3.53e-290	1	7e-10	2
INSR	rs1503504	11	19035609	1000000000	6.84e-08	0	7.4e-20	4
IPP	rs315113	12	68072810	1000000000	1.27e-08	0	3.1e-21	5
IQCB1	rs1920321	3	123039941	3325	4.36e-26	1	2.9e-19	4
IREB2	rs13180	15	76576543	0	7.26e-40	1	5.2e-12	3
IRF5	rs12155080	7	128445975	68655	0	1	1.5e-54	6
IRF5	rs2172876	7	128390528	13208	0	1	1.5e-54	6
IRF5	rs4731541	7	128465472	88152	0	1	1.5e-54	6
IRF5	rs2272347	7	128406651	29331	0	1	1.5e-54	6
ITCH	rs903863	5	6960892	1000000000	8.08e-07	0	1.5e-16	4
ITGAE	rs10503523	8	14862012	1000000000	4.72e-06	0	1.9e-12	3
ITGB2	rs2838737	21	45160008	0	7.86e-14	1	2.5e-33	6
ITPA	rs9101	20	3152084	0	7.64e-18	1	8.3e-08	1
IVD	rs7165012	15	38441330	43648	1.01e-15	1	5.3e-11	3
JAK2	rs6908267	6	6818601	1000000000	5.38e-06	0	1.4e-12	3
JARID1A	rs3008657	1	242090290	1000000000	1.72e-06	0	2e-11	3
JMJD2B	rs4671186	2	67639541	1000000000	1.56e-08	0	8.5e-11	3
KCNAB1	rs1027915	3	157738383	0	1.37e-31	1	8e-17	4
KCTD10	rs4766601	12	108374463	0	0	1	3.6e-09	2
KDELR2	rs9640023	7	6511860	21486	3.76e-90	1	1.2e-15	3
KIF1B	rs12125492	1	10344465	0	2.41e-103	1	3.6e-09	2
KLF8	rs962517	6	407299	1000000000	7.98e-06	0	2.3e-09	2
KLHDC4	rs4417557	16	86349893	0	9.16e-53	1	4.1e-18	4
KLHL18	rs9521687	13	109755663	1000000000	2.29e-07	0	1.7e-24	5
KLRB1	rs16862933	1	168252420	1000000000	1.67e-07	0	4.9e-25	5
KLRC4	rs2269304	14	64323807	1000000000	2.63e-07	0	1.4e-12	3
KLRK1	rs7180119	15	91994204	1000000000	1.24e-08	0	1e-14	3
KPNA3	rs17074473	6	113247572	1000000000	5.38e-06	0	9.4e-12	3
KYNU	rs3768844	2	143513164	0	1.32e-09	1	3.2e-18	4
KYNU	rs3816193	2	143516377	68	1.32e-09	1	3.2e-18	4
LACTB2	rs13271014	8	71691820	20225	3.01e-98	1	1.7e-10	2
LAP3	rs6449313	4	17197418	0	3.15e-84	1	4.8e-08	1
LAPTM4B	rs4940298	18	43936837	1000000000	4.7e-06	0	3.4e-19	4
LARS	rs11957907	5	145658064	109000	1.93e-07	1	1.7e-22	5
LARS2	rs3821895	3	45562987	0	1.9e-27	1	8.7e-11	3
LDHC	rs2403279	11	18373191	17238	9.35e-55	1	2.8e-15	3
LINS1	rs11247226	15	98938486	0	2.57e-153	1	3.9e-14	3
LIPH	rs361995	22	15544478	1000000000	8.17e-08	0	2.9e-13	3
LRAP	rs4422644	6	106453452	1000000000	6.47e-07	0	2.3e-52	6
LRBA	rs1624782	1	91095211	1000000000	2.43e-06	0	2.1e-15	3
LRCH3	rs9813483	3	162979261	36023281	1.24e-07	0	6.9e-12	3
LRIG2	rs13254926	8	41250327	1000000000	3.69e-06	0	5.9e-08	1
LRP8	rs12558663	23	98546230	1000000000	1.93e-08	0	2.4e-19	4
LRPAP1	rs13109504	4	3492481	0	1.68e-08	1	1.3e-08	1
LRPPRC	rs10499592	7	36524768	1000000000	1.13e-06	0	1.2e-16	4
LRRC16	rs880226	6	25510282	0	5.32e-14	1	3e-10	2
LRRC8C	rs2146340	1	89957694	4394	1.82e-31	1	1.8e-14	3
LRRK1	rs2925200	15	99427859	21	1.03e-34	1	3.4e-25	5
LUZP1	rs1726745	11	73391090	1000000000	9.23e-07	0	2.1e-09	2
LY86	rs1330803	6	6513761	19579	7e-39	1	7.6e-14	3
LY9	rs1350086	4	60993278	1000000000	7.12e-07	0	1.4e-11	3
LYSMD1	rs1199734	13	20468246	1000000000	1.72e-07	0	7.4e-13	3
LZIC	rs12187639	5	170132014	1000000000	1.21e-06	0	1.5e-11	3
MAP1B	rs7144231	14	41600587	1000000000	3.13e-06	0	1.5e-25	5
MAP2K1IP1	rs957252	9	26049028	1000000000	1.07e-06	0	1.4e-13	3
MAPK12	rs2928231	5	5651116	1000000000	1.44e-06	0	4.9e-13	3
MARCH5	rs1935864	10	93822581	218319	6.86e-17	1	9.9e-08	1
MBP	rs896040	18	72978956	5168	8.21e-13	1	7.1e-11	3
MCCC1	rs13078931	3	184261635	0	2.35e-10	1	3.8e-11	3
MCCC2	rs6418510	23	151838908	1000000000	1.67e-45	0	6.3e-08	1
MCOLN2	rs634294	1	85175585	0	4.75e-56	1	5.8e-14	3
MDGA1	rs9787465	10	55562067	1000000000	8.98e-08	0	1.1e-16	4
MDM4	rs7556371	1	202723959	28175	1.14e-13	1	1.7e-14	3
MED28	rs13022065	2	195393999	1000000000	4.92e-07	0	6.4e-23	5
MED4	rs7326381	13	47594215	26947	2.01e-275	1	1.1e-18	4
MED4	rs7332994	13	47572136	4868	2.01e-275	1	1.1e-18	4
MED4	rs7323702	13	47545828	2265	2.01e-275	1	1.1e-18	4
MED4	rs7996581	13	47534965	13128	2.01e-275	1	1.1e-18	4
MED8	rs12619197	2	22420053	1000000000	3.37e-07	0	1.5e-07	1
MFN1	rs1227991	6	165241304	1000000000	1.85e-08	0	3e-10	2
MGA	rs620331	11	118436309	1000000000	3.32e-06	0	1.6e-11	3
MGLL	rs12485738	3	56840816	72049785	1.08e-23	0	2.9e-08	1
MGMT	rs7905095	10	131338133	0	8.69e-107	1	3.1e-19	4
MGST3	rs4147596	1	163867989	0	5.2e-49	1	3.1e-11	3
MIER1	rs1118392	1	67139137	14090	1.8e-09	1	1.5e-08	1
MLF1IP	rs873686	4	185875870	0	7.34e-14	1	4.6e-13	3
MLH3	rs175048	14	74549647	573	3.88e-54	1	5.3e-26	6
MLLT10	rs362840	6	146721533	1000000000	9.45e-07	0	1.9e-13	3
MMD	rs10216100	7	103921118	1000000000	9.8e-07	0	6.6e-18	4
MOSC2	rs2925091	5	109413064	1000000000	2.19e-07	0	6.6e-21	5
MPHOSPH6	rs2967370	16	80763959	2629	1.7e-25	1	4.6e-09	2
MRE11A	rs535801	11	93851696	0	3.16e-17	1	8.1e-11	3
MRPL14	rs1935611	6	44201720	0	1.45e-28	1	2.9e-17	4
MRPL19	rs4853169	2	75760480	9093	2.04e-12	1	6.3e-11	3
MRPL34	rs3826700	19	17287501	8849	4.53e-32	1	1.7e-08	1
MRPL35	rs17378839	1	42672480	1000000000	6.79e-07	0	1.7e-08	1
MRPL36	rs972890	5	1853436	490	6.23e-44	1	5.4e-10	2
MRPL42	rs11107041	12	92386793	0	1.06e-35	1	2.6e-14	3
MRPL43	rs1122556	10	102696588	30981	8.49e-21	1	3.7e-40	6
MRPL53	rs1063588	2	74543886	8735	6.75e-21	1	1.1e-09	2
MRPL54	rs12459781	19	3713119	546	6.7e-62	1	1.9e-11	3
MRPS10	rs2180174	6	42275948	6569	2.64e-139	1	5.7e-13	3
MSI2	rs7208395	17	52674533	14397	3e-06	1	1.4e-21	5
MTERFD2	rs10188678	2	241674555	625	2.62e-07	1	1.1e-18	4
MTHFR	rs1023252	1	11821620	32918	2.66e-84	1	9.8e-08	1
MTHFS	rs7166189	15	77959440	0	9.21e-56	1	6.7e-13	3
MTRR	rs327588	5	7961359	7126	1.18e-138	1	3e-15	3
MUM1	rs17673260	19	1315306	0	6.04e-16	1	2e-09	2
MUT	rs4267943	6	49547764	8774	1.31e-113	1	4e-09	2
MUTYH	rs781058	1	45707643	128914	4.28e-22	1	1.1e-18	4
MX1	rs464783	21	41718350	0	1.81e-30	1	1.7e-13	3
MXRA7	rs7221855	17	72176449	6955	4.5e-44	1	7.2e-34	6
MYBL2	rs6683371	1	12415169	1000000000	8.33e-07	0	1.1e-09	2
MYBL2	rs11121906	1	12411062	1000000000	8.33e-07	0	1.1e-09	2
MYO9A	rs7598866	2	101640978	1000000000	3.85e-08	0	1.2e-25	5
MYOM2	rs7005151	8	2084462	3683	7.41e-98	1	5.6e-25	5
N4BP2	rs1875059	12	32594167	1000000000	4.84e-07	0	2.8e-20	4
NAPRT1	rs10112966	8	144755077	23426	2.86e-173	1	1.4e-33	6
NARF	rs8081734	17	78041822	2392	2.24e-16	1	1.9e-08	1
NARG2	rs17191414	15	58538979	0	1.13e-16	1	3.2e-21	5
NBR2	rs9287181	1	244083471	1000000000	3.41e-07	0	1e-10	3
NCKAP1	rs6873075	5	136761847	1000000000	8.53e-07	0	1e-07	1
NCL	rs12992177	2	232021212	6494	5.47e-23	1	8.2e-08	1
NCOR1	rs9969689	9	111497923	1000000000	1.04e-07	0	5.5e-10	2
NDFIP2	rs903375	2	238236238	1000000000	1.11e-06	0	1.2e-18	4
NDUFA10	rs4077387	2	240549364	0	9.38e-46	1	2e-11	3
NDUFA12	rs7304912	12	93891853	0	2.81e-23	1	1.2e-12	3
NDUFAF1	rs6852766	4	66016285	1000000000	6.03e-08	0	7e-18	4
NDUFS5	rs10888650	1	39279748	6875	1.98e-14	1	2.3e-19	4
NDUFV3	rs4148974	21	43196789	0	3.55e-80	1	3.2e-18	4
NEXN	rs1344142	3	56832473	1000000000	2.85e-11	0	5.6e-22	5
NINJ2	rs11063979	12	611480	0	5.77e-49	1	3.4e-09	2
NME7	rs1591733	1	167532460	0	2.57e-27	1	2.8e-19	4
NPAL2	rs7461545	8	99374539	0	1.96e-43	1	3.4e-11	3
NQO2	rs1028612	6	2976992	11997	6.12e-156	1	3e-14	3
NR2F6	rs16865181	2	224342529	1000000000	5.75e-10	0	2.4e-11	3
NSUN4	rs6659228	1	46583614	0	6.45e-12	1	1.5e-25	5
NSUN6	rs7843835	8	121667215	1000000000	5.29e-09	0	5.2e-09	2
NUBP2	rs692198	17	38324922	1000000000	4.46e-08	0	1.5e-10	2
NUCB2	rs214097	11	17248075	6785	1.15e-19	1	4e-09	2
NUCKS1	rs823121	1	203990925	5005	1.22e-29	1	2e-37	6
NUDT13	rs7078127	10	74517640	22576	8.37e-11	1	1.3e-10	2
NUDT2	rs10972063	9	34326342	0	3.69e-182	1	2.9e-26	6
NUMA1	rs11069223	12	117924686	1000000000	4.98e-08	0	7.5e-31	6
NUP43	rs12660304	6	150102476	0	4.63e-42	1	1.3e-10	2
NY-REN-7	rs16905084	8	135210490	-999	2.32e-09	0	3.2e-09	2
OAS1	rs7996782	13	38937224	1000000000	2.42e-07	0	7e-48	6
OAS2	rs7962891	12	95751533	16149124	1.88e-06	0	1.1e-22	5
OAT	rs870209	10	126063839	12023	7.15e-09	1	6.6e-12	3
OR2A20P	rs12697260	5	31836366	-999	1.13e-06	0	1.3e-09	2
ORMDL1	rs10885719	10	117208818	1000000000	4.71e-06	0	1.8e-36	6
ORMDL3	rs4836703	9	119588755	1000000000	3.98e-08	0	8.4e-17	4
OSBPL8	rs2669014	12	75551868	74148	2.35e-23	1	2.1e-15	3
OSTF1	rs9838755	3	107007800	1000000000	1.08e-06	0	4.9e-08	1
P2RX5	rs4530821	6	80120222	1000000000	2.42e-06	0	3.1e-10	2
PACSIN2	rs12485738	3	56840816	1000000000	7.57e-07	0	1.3e-13	3
PAG1	rs6473263	8	82195307	8449	3.54e-38	1	5.2e-11	3
PAPD4	rs7684418	4	114581335	1000000000	1.11e-07	0	4.8e-10	2
PARD3	rs11213301	11	97322177	1000000000	1.18e-06	0	1.6e-17	4
PARP14	rs16833535	3	124006955	74579	1.19e-06	1	3.2e-13	3
PARVG	rs1058348	10	11342351	1000000000	4.24e-06	0	1.3e-11	3
PAX8	rs11123172	2	113700774	0	2.12e-75	1	3.6e-31	6
PCNX	rs12365619	11	78601766	1000000000	2.89e-06	0	1e-33	6
PCTK2	rs17030004	3	3330598	1000000000	1.53e-06	0	2.2e-09	2
PCYT1A	rs9825271	3	5844391	191605261	4.17e-07	0	1.6e-08	1
PDCD2	rs3823298	6	170719316	9059	4.28e-12	1	2e-08	1
PDCD6	rs2806042	14	72484400	1000000000	1.08e-06	0	7.2e-26	6
PEX5	rs12828421	12	7226484	7740	7.78e-65	1	3.4e-13	3
PEX6	rs2274517	6	43040693	0	0	1	1.1e-31	6
PEX6	rs3818554	6	43042598	0	0	1	1.1e-31	6
PEX7	rs6570108	6	137255840	0	1.1e-13	1	3e-09	2
PGGT1B	rs9326953	5	114576986	0	2.06e-32	1	8e-18	4
PGM1	rs4915895	1	63585673	245862	4.69e-25	1	5.4e-10	2
PGS1	rs2090205	17	73897869	0	2.77e-11	1	1.1e-24	5
PHACS	rs2074040	11	44049899	-999	8.58e-181	0	6.8e-33	6
PHACTR4	rs6682922	1	28562758	5922	2.14e-67	1	9.3e-09	2
PHC3	rs6693617	1	104648006	1000000000	2.68e-06	0	2.2e-10	2
PHF15	rs7837382	8	15734826	1000000000	1.41e-07	0	1.9e-08	1
PIGN	rs7235710	18	58003081	0	5.53e-60	1	8.4e-13	3
PIK3CB	rs215986	12	2580141	1000000000	6.7e-08	0	4.1e-08	1
PILRB	rs7341507	7	99789251	0	1.18e-156	1	3.4e-16	4
PIP5K1C	rs9815283	3	15842379	1000000000	1.4e-07	0	1.1e-08	1
PKHD1L1	rs1344142	3	56832473	1000000000	2.23e-08	0	8.9e-30	6
PLA2G4C	rs385203	19	53298343	0	6.47e-89	1	4.6e-12	3
PLAC8	rs7667017	4	84398095	143160	1.42e-12	1	2.6e-10	2
PLAC8	rs6535451	4	84398642	143707	1.42e-12	1	2.6e-10	2
PLEK	rs1016350	2	68455320	0	1.22e-08	1	1.3e-26	6
PLXNA3	rs2872817	23	153211612	128205	6.55e-61	1	1.4e-09	2
PMS1	rs4676248	2	109138785	81218570	1.78e-07	0	1.9e-29	6
PNPT1	rs33955417	6	3582573	1000000000	2.58e-06	0	3.2e-13	3
POLE4	rs17100267	14	101034975	1000000000	2.69e-06	0	4.6e-15	3
PPAT	rs9922572	16	86891613	1000000000	1.59e-06	0	4.1e-29	6
PPIE	rs1495216	8	34120698	1000000000	3.78e-06	0	9.1e-17	4
PPIL3	rs10167387	2	201516863	54592	1.87e-292	1	3.2e-37	6
PPP6C	rs10099462	8	49319443	1000000000	6.13e-07	0	8.4e-11	3
PRDX2	rs8104821	19	12635862	132772	3.19e-47	1	3.1e-20	4
PRDX5	rs1544538	11	63744916	83107	9.9e-13	1	2e-09	2
PRKCA	rs3843733	17	61893622	0	2.48e-13	1	6.4e-08	1
PRKCB1	rs7404095	16	23772091	0	3.26e-107	1	6.4e-09	2
PRKCE	rs12456720	18	74611874	1000000000	2.3e-06	0	4.2e-21	5
PRKD3	rs10879301	12	70253342	1000000000	6.86e-11	0	2.3e-08	1
PRPSAP1	rs17008675	4	87189425	1000000000	6.86e-06	0	2.2e-13	3
PSMB9	rs6938130	6	32939225	0	2.31e-56	1	1.2e-09	2
PSPH	rs11772761	7	49709884	6336356	4.76e-06	0	1.4e-24	5
PTBP2	rs12022396	1	96921706	38221	3.96e-07	1	8.8e-11	3
PTPN12	rs11489585	7	77152788	45464	1.15e-17	1	1.7e-12	3
PWP1	rs1045741	12	106651403	21016	2.36e-09	1	1.2e-11	3
PXMP2	rs10894433	11	131121211	1000000000	3.26e-06	0	6.4e-08	1
PYHIN1	rs4114169	8	108525981	1000000000	5.24e-08	0	4e-09	2
QKI	rs11661410	18	67628945	1000000000	1.81e-06	0	1.4e-08	1
QRSL1	rs1026619	6	107221054	0	1.26e-39	1	1.2e-22	5
RAB15	rs2330607	5	30850387	1000000000	6.61e-07	0	3.6e-11	3
RAB31	rs212489	17	29754223	1000000000	1.77e-06	0	2.1e-27	6
RAB7L1	rs17338777	5	103337570	1000000000	2.04e-06	0	1.8e-09	2
RABAC1	rs973152	5	41314270	1000000000	1e-07	0	9.3e-18	4
RABEP1	rs1806261	17	5257732	30490	1.36e-37	1	5e-33	6
RABGAP1L	rs6693979	1	173118559	0	3.56e-14	1	2.4e-09	2
RAD50	rs2069812	5	131907815	12714	5.18e-11	1	1.4e-08	1
RAD51	rs13021490	2	1290164	1000000000	1.36e-06	0	1e-10	3
RAD51C	rs1864754	17	54043788	81174	1.78950576923699e-320	1	7.3e-13	3
RAD52	rs7928297	11	115634816	1000000000	1.86e-06	0	3.4e-20	4
RALB	rs1478842	3	35127164	1000000000	1.02e-06	0	6.7e-16	4
RASGRP3	rs11693332	2	33556507	0	1.35e-07	1	1.9e-08	1
RBBP5	rs6664406	1	243512963	40155197	6.42e-07	0	7.5e-08	1
RBL2	rs7753282	6	145406043	1000000000	1.43e-06	0	2.9e-09	2
RBM6	rs7628058	3	50014478	0	2.58e-42	1	1.2e-12	3
RBMS2	rs7313074	12	55440756	170881	1.22e-78	1	9.1e-15	3
RC3H1	rs13298097	9	117087692	1000000000	5.51e-07	0	1.3e-07	1
RCL1	rs1797040	20	23855744	1000000000	1.55e-08	0	4.4e-14	3
RDH11	rs1344142	3	56832473	1000000000	1.13e-10	0	3.3e-10	2
RIOK2	rs957252	9	26049028	1000000000	2.3e-06	0	9.3e-08	1
RIPK1	rs11228526	11	68672423	1000000000	2.24e-06	0	2.9e-08	1
RIT1	rs10852143	15	89423285	1000000000	9.29e-06	0	5.5e-09	2
RNF168	rs7070276	10	53653390	1000000000	9.12e-07	0	3.4e-08	1
RNGTT	rs10944413	6	89689765	0	3e-08	1	1.7e-09	2
RNPS1	rs12599229	16	2263395	5280	2.78e-12	1	1.8e-10	2
ROCK2	rs17533728	8	6201007	1000000000	1.36e-06	0	1.2e-09	2
RPH3AL	rs9915268	17	72083	0	3.44e-45	1	1.6e-28	6
RPL10	rs1015130	6	117934186	1000000000	1.05e-06	0	1e-07	1
RPL17	rs2309557	17	6105712	1000000000	3.63e-06	0	7.3e-10	2
RPL23	rs6930403	6	161960771	1000000000	2.27e-07	0	5.1e-08	1
RPL23AP7	rs1597245	2	114164687	-999	8.48e-278	0	6e-16	4
RPL31	rs12575236	11	6978614	1000000000	2.31e-06	0	4.2e-35	6
RPL36AL	rs2985697	14	49162652	5553	1.17e-12	1	2.5e-09	2
RPL37	rs461404	5	40835297	31890	1.89e-07	1	4e-16	4
RPL8	rs11784860	8	145984603	1355	1.67e-47	1	1.5e-10	2
RPP14	rs17093693	14	69719545	1000000000	3.34e-09	0	1.2e-15	3
RPP40	rs2255852	1	159193669	1000000000	3.14e-06	0	3.1e-09	2
RPS21	rs1043008	20	60396338	0	1.54e-24	1	5.5e-23	5
RPS23	rs862242	5	81623322	13327	0	1	1.4e-36	6
RPS23	rs862245	5	81621493	11498	0	1	1.4e-36	6
RPS23	rs6894520	5	81630504	20509	0	1	1.4e-36	6
RPS26	rs11171739	12	54756892	32621	0	1	3.6e-61	6
RPS27L	rs2759257	1	41722215	1000000000	4.91e-07	0	3.7e-11	3
RQCD1	rs893081	3	14368746	1000000000	1.44e-06	0	1.2e-14	3
RRAGB	rs9442837	6	73494939	1000000000	4.42e-06	0	2.8e-08	1
RREB1	rs13005169	2	29353959	1000000000	2.69e-06	0	1.7e-16	4
RSRC1	rs1369560	3	159727267	0	2.09e-29	1	1.7e-08	1
S100A11	rs12588509	14	64117025	1000000000	6.51e-07	0	1.4e-09	2
S100A13	rs913860	1	151886751	13559	5.45e-80	1	1.4e-14	3
SAR1A	rs12412099	10	71629954	29669	1.41e-10	1	4.2e-44	6
SATL1	rs12351443	9	109742564	1000000000	3.29e-07	0	3e-08	1
SCD5	rs453061	11	8227452	1000000000	8.8e-07	0	5.3e-41	6
SCRN2	rs2074185	17	43285583	11942	3.8e-09	1	1.2e-08	1
SCYE1	rs7658304	4	115083211	7593380	3.43e-06	0	3.9e-10	2
SDCCAG8	rs10158537	1	241554809	0	4.04e-49	1	2.7e-09	2
SDHA	rs1495216	8	34120698	1000000000	6.92e-07	0	2.9e-09	2
SEC61A2	rs11257556	10	12217710	0	4.37e-22	1	5.9e-12	3
SEMA4A	rs2842880	1	154498982	84815	4.7e-08	1	4.4e-09	2
SENP6	rs1068103	20	8312831	1000000000	2.92e-06	0	3.2e-13	3
SENP7	rs12496159	3	102660334	0	8.31e-14	1	4.2e-08	1
SERBP1	rs1656463	3	25593163	1000000000	1.37e-06	0	2.3e-13	3
SERPINB1	rs386915	6	2779264	0	6.33e-26	1	9.5e-16	4
SERPINB10	rs6103	18	59721483	4722	3.12e-134	1	2.1e-23	5
SERPINB9	rs1052886	6	2835189	0	4.59e-36	1	2.4e-22	5
SERTAD3	rs1495216	8	34120698	1000000000	9.45e-07	0	1.8e-08	1
SF1	rs637332	11	64285326	3328	1.19e-58	1	2.1e-09	2
SFRS6	rs10030326	4	157454500	1000000000	1.57e-06	0	1.2e-29	6
SFXN4	rs3740558	10	120909169	0	3.54e-11	1	5.1e-10	2
SH3MD4	rs9433755	1	101495211	1000000000	4.28e-07	0	1e-10	3
SH3TC1	rs10897113	11	60312794	1000000000	1.42e-07	0	1.3e-23	5
SHMT1	rs8076336	17	18153339	18573	8.4e-108	1	1.1e-10	2
SIAH1	rs924753	3	15681128	1000000000	4.92e-08	0	7.3e-16	4
SIGIRR	rs12312694	12	8635276	1000000000	5.42e-06	0	1.1e-09	2
SLAMF7	rs4286013	13	75755475	1000000000	4.83e-07	0	2.7e-11	3
SLC15A2	rs9849087	3	122947910	148067	3.35e-16	1	1.5e-18	4
SLC1A3	rs2909000	12	12099276	1000000000	5.33e-12	0	7.1e-10	2
SLC22A5	rs2631360	5	131735328	0	6.66e-85	1	1.8e-08	1
SLC25A23	rs2076590	1	112065205	1000000000	1.1e-09	0	2.9e-17	4
SLC25A29	rs10873515	14	99836417	0	5.2e-62	1	3.1e-15	3
SLC27A5	rs2827317	21	22562886	1000000000	4.61e-07	0	2e-13	3
SLC30A9	rs2876374	6	15016728	1000000000	5.6e-06	0	1.8e-18	4
SLC35A1	rs9444504	6	88237765	1649	5.41e-11	1	2.5e-11	3
SLC35F5	rs2044686	2	114170499	17901	1.37e-11	1	3.9e-17	4
SLC38A1	rs1492890	12	44886884	0	7e-20	1	3.2e-24	5
SLC7A7	rs7157654	14	22352590	0	3.58e-16	1	1.1e-08	1
SLC9A3	rs17501374	2	66421619	1000000000	1.34e-06	0	3.5e-21	5
SLFN5	rs11080325	17	30587822	6377	1.45e-34	1	9.1e-09	2
SMARCE1	rs11078951	17	36084941	27312	2.95e-66	1	5.1e-21	5
SNAP29	rs2072514	22	19429478	113814	3.02e-144	1	1.9e-12	3
SND1	rs415606	22	16900654	1000000000	1.99e-06	0	3.2e-09	2
SNRPA1	rs6722302	2	58498173	1000000000	3.85e-06	0	8.3e-13	3
SNX16	rs11987669	8	82933045	16055	9.76e-58	1	5.2e-13	3
SNX27	rs9834518	3	191217916	1000000000	3.11e-07	0	4.5e-08	1
SNX5	rs17802375	20	17886883	0	7.42e-08	1	9.8e-11	3
SOD2	rs7855	6	160020292	0	3.88e-150	1	8.7e-09	2
SOS1	rs6544186	2	39079775	0	5.23e-24	1	6.1e-12	3
SP140	rs6489955	12	113269662	1000000000	1.02e-07	0	1.9e-10	2
SPATA20	rs9913430	17	45983469	0	2.19e-121	1	2.9e-34	6
SPECC1	rs2703800	17	20027154	0	5.49e-10	1	5.7e-08	1
SPG20	rs9575933	13	35808743	0	6.84e-12	1	8.3e-11	3
SPG7	rs3803676	16	88123607	0	1.08e-26	1	5e-09	2
SPIN1	rs1842598	12	36274326	1000000000	7.73e-07	0	5.9e-10	2
SPIN1	rs6582600	12	36228889	1000000000	7.73e-07	0	5.9e-10	2
SPINT2	rs7253245	19	43445626	1416	3.34e-17	1	4.4e-22	5
SPIRE1	rs479860	18	12515881	0	1.58e-35	1	9.2e-08	1
SPTLC1	rs1875059	12	32594167	1000000000	1.37e-06	0	6.3e-09	2
SPTLC2	rs7753282	6	145406043	1000000000	5.14e-07	0	1.8e-13	3
SQSTM1	rs9476904	6	15859309	1000000000	3.9e-06	0	1.4e-08	1
SRI	rs7810426	7	87664893	7478	1.81e-26	1	1.5e-12	3
SRPRB	rs6773354	3	135024464	2251	3.89e-36	1	1.4e-15	3
SRR	rs16952025	17	2063548	90450	3.66e-22	1	3.4e-24	5
SRXN1	rs6116961	20	581149	0	1.42e-71	1	1.2e-17	4
SSH2	rs4474741	17	25172243	0	9.38e-52	1	6.6e-09	2
SSR3	rs2280032	3	157731485	9754	4.45e-16	1	1.1e-13	3
SSTR2	rs7030024	9	111392868	1000000000	2.16e-07	0	8e-08	1
ST3GAL5	rs7593080	2	85999298	29630	1.17e-07	1	1.1e-07	1
ST3GAL6	rs2290067	3	99989388	0	5.61e-31	1	1.4e-13	3
ST7L	rs6666579	1	112933916	0	3.13e-76	1	1.3e-12	3
STAT4	rs16862933	1	168252420	1000000000	6.27e-07	0	1.8e-22	5
STIM2	rs16828904	1	186770248	1000000000	4.01e-07	0	1.2e-15	3
STK17B	rs17061712	3	59957050	1000000000	1.72e-06	0	5.5e-14	3
STYXL1	rs17148983	7	75487757	0	7.6e-70	1	8.3e-08	1
SUPT3H	rs9349303	6	44900557	3890	1.99e-09	1	1.3e-11	3
SURF1	rs3124768	9	135294318	81136	5.03e-34	1	3.4e-12	3
SWAP70	rs93138	11	9716289	-999	5.94e-30	0	1.6e-08	1
SYNE2	rs12526141	6	107137365	1000000000	8.66e-08	0	5e-10	2
SYNGR1	rs5750811	22	38123012	11475	8.13e-21	1	1.4e-19	4
SYT17	rs12445464	16	19186313	258	9.47e-09	1	3.3e-08	1
TAF15	rs7948556	11	60274463	1000000000	1.89e-06	0	1e-09	2
TAF1B	rs11686239	2	9963168	0	5.67e-20	1	1.1e-11	3
TAF6	rs260699	2	108933877	1000000000	5.78e-06	0	3.6e-09	2
TAP2	rs3916765	6	32793528	104060	9.79e-28	1	7.1e-22	5
TAPBPL	rs2244083	12	6440800	0	1.2e-130	1	1.5e-38	6
TAS2R5	rs1285933	7	141273618	136049	2.36e-10	1	3.9e-11	3
TBC1D4	rs8002876	13	74800864	0	1.48e-14	1	1.6e-14	3
TBC1D5	rs16888579	6	77860206	1000000000	2.28e-08	0	6.8e-12	3
TBC1D8	rs11690047	2	100986482	3641	1.11e-10	1	1.7e-21	5
TCF19	rs4578625	15	98951575	1000000000	1.05e-06	0	4.6e-13	3
TCF4	rs876039	7	50279357	1000000000	1.6e-06	0	1e-08	2
TFB1M	rs9397236	6	155626925	0	9.41e-20	1	9.9e-13	3
TFG	rs6775789	3	101899916	10934	1.03e-238	1	2.4e-15	3
TGOLN2	rs273276	19	18125940	1000000000	2.43e-07	0	2.3e-15	3
THEM4	rs13320	1	150113141	0	3.18e-20	1	3e-10	2
TIMM10	rs1846568	11	57114290	59482	0	1	3.6e-22	5
TIMM10	rs2649663	11	57113881	59073	0	1	3.6e-22	5
TIMM10	rs2581922	11	57021976	30538	0	1	3.6e-22	5
TIMM10	rs2649662	11	57109138	54330	0	1	3.6e-22	5
TIMM10	rs2729371	11	57077898	23090	0	1	3.6e-22	5
TIMM13	rs9932721	16	85481747	1000000000	3.18e-07	0	6.5e-09	2
TIMM22	rs9896110	17	850569	0	4.21e-152	1	8.3e-10	2
TINP1	rs16872345	5	74185234	76744	8.13e-89	1	1.2e-19	4
TIPRL	rs7801619	7	189089	1000000000	7.32e-07	0	1.1e-09	2
TK2	rs725131	16	65143211	1395	7.35e-17	1	1.8e-14	3
TLE6	rs6069864	20	54766280	1000000000	9.57e-08	0	4.8e-10	2
TLK1	rs1344142	3	56832473	1000000000	5.74e-12	0	4.6e-38	6
TLR1	rs13439585	8	69880596	1000000000	3.87e-06	0	5.8e-16	4
TLR10	rs10489811	1	119784626	1000000000	4.92e-06	0	3.6e-08	1
TM6SF1	rs13379920	15	81547397	20006	1.75e-100	1	1.9e-12	3
TMBIM4	rs1168765	12	64799378	17607	6.4e-19	1	6.6e-18	4
TMEM45A	rs4928097	3	101696468	0	1.09e-16	1	2e-09	2
TMEM50A	rs1053359	1	25500660	36738	8.43e-33	1	1.7e-11	3
TMEM8	rs3830160	16	359093	2772	8.75e-78	1	3.7e-14	3
TMEM80	rs4963126	11	646845	38139	5.4e-60	1	1.1e-09	2
TMLHE	rs11887	23	154120651	252316	4.98e-45	1	2.7e-12	3
TNIK	rs7785360	7	69047314	1000000000	1.32e-06	0	1.4e-12	3
TOB1	rs12863903	13	95436652	1000000000	6.36e-07	0	9e-19	4
TPCN2	rs4930265	11	68612530	0	5.5e-127	1	1.9e-15	3
TPM4	rs12485738	3	56840816	1000000000	1.31e-16	0	9.2e-10	2
TPP2	rs674929	13	102124951	0	1.81e-13	1	4e-12	3
TPST2	rs4275	22	25251725	0	1.07e-19	1	4.1e-18	4
TRA2A	rs12534005	7	23469043	41885	3.35e-15	1	8.4e-09	2
TRAM2	rs9370134	6	52561567	11746	2.92e-32	1	2.1e-13	3
TRAPPC4	rs10111	11	118391327	3124	3.63e-81	1	1.8e-25	5
TRIB1	rs16915505	12	19513485	1000000000	1.31e-06	0	6.8e-14	3
TRIM33	rs7684418	4	114581335	1000000000	7.23e-08	0	6.2e-10	2
TSFM	rs10877019	12	56459196	3630	7.33e-20	1	1e-13	3
TSG101	rs4862411	4	185901768	1000000000	5.41e-06	0	3.7e-22	5
TSGA10	rs12613624	2	99099173	0	3.78e-82	1	8.2e-11	3
TSGA10	rs1133977	2	99108416	0	3.78e-82	1	8.2e-11	3
TSPAN3	rs17471480	15	75542605	392037	3.45e-07	1	6.5e-08	1
TTC19	rs2285583	17	15908868	19807	1.01e-19	1	6.5e-29	6
TUBB6	rs7504558	18	12294781	3476	3.18e-84	1	2.4e-13	3
TUG1	rs17782224	14	67085446	-999	8.16e-07	0	7e-10	2
TXN	rs6033083	20	11205091	1000000000	2.94e-06	0	1.1e-07	1
TXNL4A	rs7276320	21	43142657	1000000000	2.7e-06	0	2.2e-09	2
U2AF1	rs7735773	5	107400993	1000000000	2.83e-08	0	2.2e-30	6
U2AF1L4	rs3848662	19	40907896	17374	1.68e-115	1	2.9e-17	4
UBE2B	rs17425876	1	199567676	1000000000	7.34e-07	0	1.2e-11	3
UBE2E1	rs12285109	11	85299377	1000000000	4.58e-06	0	9.8e-14	3
UBE3C	rs8101	7	156754235	0	1.02e-28	1	5.5e-20	4
UCP2	rs4944871	11	73356593	6771	8.32e-71	1	1.6e-13	3
UNC13B	rs4769307	13	23495985	1000000000	3.58e-07	0	3.2e-11	3
UROS	rs2027515	10	127485822	0	2.43e-14	1	1.4e-13	3
USP34	rs295075	17	29805244	1000000000	2.22e-07	0	1.4e-15	3
USP36	rs3744800	17	74305420	0	4.34e-260	1	1.7e-23	5
USP45	rs231961	6	155799473	55729444	9.23e-07	0	1.5e-23	5
USP48	rs6667223	1	21961428	0	3.4e-27	1	3.3e-14	3
USP7	rs839128	12	85073786	1000000000	1.4e-07	0	7e-31	6
UST	rs8044807	16	10265564	1000000000	4.19e-07	0	6.4e-16	4
UTS2	rs11587880	1	7745544	80186	7.32e-09	1	9.2e-13	3
VAMP1	rs2534717	12	6444010	0	3.16e-99	1	1.5e-11	3
VAMP5	rs13426038	2	85656909	8133	8.15e-09	1	6.8e-09	2
VAMP8	rs7571691	2	232077645	146414980	3.82e-06	0	6.3e-13	3
VPREB3	rs2733588	15	55707422	1000000000	1.05e-06	0	9e-14	3
WARS2	rs1325939	1	119385491	0	3.49e-120	1	1.7e-33	6
WDR18	rs12710103	19	964634	19065	1.79e-12	1	2.7e-25	5
WDR22	rs1416812	1	110918275	1000000000	2.2e-07	0	7.2e-24	5
WDR4	rs1893596	21	43109766	26509	2.36e-40	1	2.5e-10	2
WDR41	rs335628	5	76765294	0	0	1	4.8e-31	6
WDR48	rs1053530	3	39113086	0	3.53e-102	1	2.8e-11	3
WSB1	rs3753522	1	207891522	1000000000	3.85e-07	0	1.3e-13	3
XAB1	rs12814819	12	104638062	1000000000	2.39e-06	0	2.1e-10	2
XPC	rs1975192	3	349788	13811863	2.08e-06	0	3.5e-14	3
XRCC3	rs12432994	14	103208392	25316	6.17e-12	1	1.4e-08	1
XRRA1	rs7105085	11	74247587	0	4.58e-58	1	1.2e-38	6
XYLT2	rs1344142	3	56832473	1000000000	4.09e-13	0	1.5e-24	5
YEATS2	rs1073671	4	189979510	1000000000	1.17e-06	0	2.1e-08	1
YEATS4	rs11177644	12	68072015	1173	2.84e-153	1	1.5e-08	1
YTHDC2	rs6033323	20	12073993	1000000000	1.7e-09	0	2.7e-10	2
YTHDC2	rs13039035	20	12081935	1000000000	1.7e-09	0	2.7e-10	2
YWHAE	rs11055431	12	13482502	1000000000	2.49e-06	0	2.6e-14	3
YWHAE	rs11055430	12	13482423	1000000000	2.49e-06	0	2.6e-14	3
ZADH2	rs1132845	18	71041457	0	5.9e-17	1	1.8e-09	2
ZBTB25	rs11158542	14	63999411	23899	5.92e-65	1	1.1e-16	4
ZC3HAV1	rs2678919	2	57977863	1000000000	2.5e-06	0	3.6e-09	2
ZCCHC2	rs4839731	6	99339353	1000000000	4.44e-06	0	3.7e-14	3
ZFAND2A	rs2949192	7	1170367	4027	6.76e-72	1	3.1e-13	3
ZFR	rs118020	7	13882768	1000000000	1.36e-06	0	1.3e-13	3
ZFYVE19	rs3743034	15	38888437	0	1.52e-22	1	1.2e-12	3
ZNF124	rs9793102	1	245389883	0	5.68e-65	1	1.7e-21	5
ZNF131	rs710576	3	191215898	1000000000	1.29e-07	0	9.8e-26	6
ZNF266	rs7246415	19	9395981	0	4.06e-88	1	1.2e-25	5
ZNF586	rs9304805	19	63000426	0	1.24e-27	1	5.8e-10	2
ZNF593	rs12145403	1	26469776	98638	9.2e-57	1	8.1e-11	3
ZNF605	rs10735673	12	132085780	42815	1.81e-11	1	9.5e-09	2
ZNF74	rs887023	22	19091899	0	7.74e-14	1	3.4e-08	1
ZNF85	rs17618127	19	20928675	3334	1.29e-35	1	2e-21	5
ZNHIT3	rs11054701	12	12180423	1000000000	7.65e-07	0	1.2e-11	3
ZNRD1	rs7742712	6	30079056	57957	1.6e-16	1	1.3e-09	2
ZP3	rs35613536	7	75981561	72241	1.12e-288	1	8.5e-17	4
ZSWIM1	rs703715	12	100208060	1000000000	6.98e-07	0	1.1e-16	4
