# Supplementary material for: Genetics and Beyond – The Transcriptome of Human Monocytes and Disease Susceptibility
Source: PLoS One. 2010 May 18;5(5):e10693. doi: 10.1371/journal.pone.0010693 (PMC2872668; doi:10.1371/journal.pone.0010693)
Supplement: File S6 — GHS - Expression traits associated with risk factors. (0.29 MB XLS) [file pone.0010693.s011.xls]

## Sheet: Supplementary file 6. Expressio
	Regression coefficient of gene expression on risk factor
Gene name	Risk factor	Estimate	SE	t-value	P-value
AARS	gender	-0.0467119	0.00793345	-5.88796	4.82e-09
ABCB1	gender	-0.296721	0.0573515	-5.17373	2.61e-07
ABCB6	gender	0.130767	0.0152356	8.583	2.29e-17
ABCC5	gender	0.079622	0.0103114	7.72177	2.09e-14
ABHD2	gender	0.072483	0.0109147	6.64085	4.36e-11
ABHD4	gender	0.108378	0.0161376	6.71585	2.65e-11
ABI3	gender	-0.0706848	0.0114798	-6.15734	9.5e-10
ABLIM1	gender	0.164563	0.0261894	6.28357	4.34e-10
ACAD9	gender	-0.0404699	0.00732392	-5.52572	3.87e-08
ACN9	gender	-0.0509684	0.00874453	-5.8286	6.84e-09
ACRBP	gender	0.171495	0.0262013	6.54526	8.15e-11
ACTN1	gender	0.0906113	0.0163419	5.54472	3.48e-08
ACTR3B	gender	0.12905	0.0250247	5.15689	2.85e-07
ACVR1	gender	0.0687419	0.010703	6.4227	1.8e-10
ADAM8	gender	0.08515	0.013857	6.14491	1.03e-09
ADARB1	gender	0.101491	0.0135322	7.49993	1.09e-13
ADCY4	gender	0.0930327	0.0169989	5.47288	5.19e-08
ADCY9	gender	0.0814196	0.0149339	5.45199	5.82e-08
ADFP	gender	0.0628919	0.0120591	5.21528	2.09e-07
ADIPOR1	gender	0.0906442	0.0117869	7.69027	2.65e-14
ADM	gender	0.133845	0.016416	8.15332	7.44e-16
ADORA2A	gender	0.13729	0.0237223	5.78737	8.7e-09
ADORA2B	gender	0.0652312	0.0127848	5.10223	3.79e-07
AFAP1	gender	0.20398	0.0350297	5.82305	7.07e-09
AFAP1L2	gender	0.291344	0.0343334	8.48574	5.1e-17
AFF3	gender	-0.124273	0.0215115	-5.77704	9.24e-09
AGBL5	gender	0.0817611	0.0155117	5.27094	1.56e-07
AGK	gender	-0.0705665	0.00795059	-8.87563	1.95e-18
AGRP	gender	0.130714	0.0189863	6.88465	8.51e-12
AIFM1	gender	-0.0321857	0.00598563	-5.37717	8.77e-08
AKAP12	gender	0.152636	0.0210605	7.24751	6.79e-13
AKR1C3	gender	-0.225961	0.0275608	-8.19865	5.19e-16
AKR1C4	gender	-0.197674	0.0344921	-5.731	1.21e-08
ALAS2	gender	0.629011	0.0694126	9.06191	3.93e-19
ALDH4A1	gender	-0.0783484	0.0143693	-5.45248	5.81e-08
ALG13	gender	0.0474039	0.00798822	5.93423	3.67e-09
ALOX5AP	gender	0.0891757	0.0138983	6.41632	1.87e-10
ALPL	gender	0.483124	0.0622408	7.76217	1.54e-14
ALS2CR2	gender	0.14027	0.0195829	7.16286	1.24e-12
ANGPT1	gender	0.156976	0.0189069	8.30259	2.26e-16
ANKDD1A	gender	-0.089952	0.0143419	-6.27198	4.66e-10
ANKRD16	gender	-0.0602336	0.0112828	-5.33852	1.08e-07
ANKRD28	gender	0.170815	0.0211662	8.07019	1.43e-15
ANKRD55	gender	0.452572	0.0447177	10.1206	2.5e-23
ANKRD57	gender	0.125011	0.0123705	10.1056	2.88e-23
ANPEP	gender	0.195753	0.0275404	7.10782	1.82e-12
APP	gender	0.104345	0.0180015	5.79647	8.25e-09
AQP10	gender	0.252646	0.0392263	6.44074	1.6e-10
ARG2	gender	0.431777	0.040987	10.5345	4.46e-25
ARID3B	gender	0.0795852	0.0104461	7.61865	4.54e-14
ARID5B	gender	-0.13139	0.0205138	-6.40495	2.01e-10
ARL4C	gender	-0.288827	0.0476611	-6.06003	1.72e-09
ARL6IP1	gender	-0.0726147	0.0106902	-6.79262	1.59e-11
ARPC5L	gender	-0.0542955	0.0100534	-5.40072	7.72e-08
ARSD	gender	0.437091	0.0136062	32.1244	1.93e-172
ASNS	gender	-0.133517	0.0194927	-6.84959	1.08e-11
ATAD1	gender	-0.0739412	0.0137359	-5.38307	8.5e-08
ATP6V0A1	gender	0.0731768	0.00850502	8.60396	1.92e-17
ATP6V0E1	gender	0.0288102	0.0053017	5.43414	6.42e-08
ATP6V0E2	gender	-0.107157	0.0119113	-8.9962	6.94e-19
ATP9A	gender	0.178827	0.0260109	6.87509	9.09e-12
ATPBD4	gender	-0.0776978	0.0136958	-5.67311	1.68e-08
ATRIP	gender	-0.0636907	0.0115334	-5.5223	3.94e-08
AURKA	gender	-0.0835327	0.0135155	-6.18053	8.23e-10
AZI1	gender	-0.0503937	0.00986758	-5.107	3.7e-07
AZU1	gender	-0.178318	0.0338068	-5.27462	1.53e-07
B3GAT1	gender	-0.198334	0.0333112	-5.95398	3.26e-09
BACE2	gender	0.455063	0.0873594	5.20909	2.16e-07
BAIAP2	gender	0.0923875	0.0170797	5.40918	7.37e-08
BAMBI	gender	0.624861	0.062172	10.0505	4.87e-23
BAT5	gender	0.0474044	0.00902335	5.25352	1.71e-07
BATF3	gender	-0.0809934	0.0157142	-5.15415	2.89e-07
BCL11B	gender	-0.377472	0.0697659	-5.41055	7.31e-08
BCL2L1	gender	0.137069	0.0186749	7.33977	3.51e-13
BCL3	gender	0.0553386	0.0106826	5.18024	2.52e-07
BHLHB2	gender	0.0588382	0.0102531	5.73858	1.15e-08
BMP6	gender	0.193225	0.026318	7.34195	3.45e-13
BNIP3	gender	-0.0944868	0.0140555	-6.7224	2.54e-11
BOLA3	gender	-0.126678	0.0092984	-13.6236	6.46e-40
BTBD12	gender	0.0628132	0.010834	5.79779	8.19e-09
BZRAP1	gender	-0.234035	0.0402357	-5.8166	7.34e-09
C1QBP	gender	-0.0507142	0.00854978	-5.93163	3.72e-09
CA5B	gender	0.0887037	0.0125391	7.07416	2.31e-12
CA8	gender	0.886773	0.0951686	9.31791	4.13e-20
CABP5	gender	0.208517	0.0347603	5.9987	2.49e-09
CACNG6	gender	0.667887	0.0599478	11.1412	9.57e-28
CARD11	gender	-0.120357	0.0191101	-6.29808	3.96e-10
CATSPER1	gender	0.0613562	0.0110563	5.54942	3.39e-08
CAV2	gender	0.33496	0.0371546	9.01529	5.88e-19
CCDC102A	gender	-0.199155	0.0364813	-5.45909	5.6e-08
CCDC106	gender	-0.176492	0.0130536	-13.5205	2.26e-39
CCL2	gender	0.254157	0.0466353	5.44989	5.89e-08
CCL4L2	gender	-0.281579	0.0422046	-6.67175	3.55e-11
CCNA1	gender	0.625379	0.0774227	8.07745	1.35e-15
CCND1	gender	-0.162051	0.0257272	-6.29883	3.94e-10
CCND2	gender	-0.0936314	0.0164598	-5.6885	1.54e-08
CCR3	gender	1.12336	0.0778355	14.4325	2.73e-44
CCT3	gender	-0.0589251	0.0104956	-5.61428	2.35e-08
CCT6B	gender	-0.136862	0.0155699	-8.79016	4.04e-18
CD1A	gender	0.124289	0.0169628	7.32714	3.84e-13
CD200R1	gender	0.282591	0.0537342	5.25905	1.66e-07
CD200R2	gender	0.746292	0.104385	7.1494	1.36e-12
CD24	gender	-1.07687	0.0665955	-16.1704	2.62e-54
CD247	gender	-0.399746	0.0430483	-9.28599	5.49e-20
CD300LB	gender	0.0923991	0.0129641	7.12729	1.59e-12
CD44	gender	0.0458025	0.00835918	5.47931	5.01e-08
CD6	gender	-0.414166	0.0514946	-8.0429	1.77e-15
CD69	gender	-0.219595	0.0423054	-5.1907	2.38e-07
CD7	gender	-0.172013	0.0320178	-5.37241	9.01e-08
CD8A	gender	-0.467842	0.0910934	-5.13585	3.18e-07
CD99	gender	-0.0826594	0.0137743	-6.001	2.46e-09
CDC14B	gender	0.171233	0.0323928	5.28614	1.44e-07
CDH26	gender	-0.0962363	0.018197	-5.28858	1.42e-07
CDKN1A	gender	0.168997	0.0164323	10.2844	5.16e-24
CEACAM1	gender	0.0752096	0.013215	5.69121	1.52e-08
CECR6	gender	0.11499	0.0197129	5.83323	6.66e-09
CELSR3	gender	-0.241504	0.0300651	-8.0327	1.92e-15
CENTD3	gender	0.0533042	0.00889333	5.99373	2.57e-09
CENTG2	gender	-0.548326	0.0766376	-7.15479	1.31e-12
CETP	gender	0.148454	0.0181834	8.16425	6.82e-16
CHST12	gender	-0.102946	0.0150349	-6.84712	1.1e-11
CIRBP	gender	-0.0804189	0.00933349	-8.61616	1.74e-17
CISD1	gender	-0.0541319	0.0102747	-5.26846	1.58e-07
CLC	gender	0.974785	0.0647796	15.0477	9.64e-48
CLCN3	gender	0.0712801	0.013482	5.28708	1.43e-07
CLDN5	gender	0.261857	0.0312446	8.38086	1.2e-16
CLEC1B	gender	0.193467	0.0300341	6.44156	1.59e-10
CLEC4E	gender	0.130439	0.0245914	5.30427	1.3e-07
CLEC4G	gender	-0.180208	0.0248424	-7.25403	6.48e-13
CLEC5A	gender	0.156711	0.0247642	6.32811	3.28e-10
CLIC4	gender	0.0775359	0.0138963	5.5796	2.86e-08
CLIP2	gender	0.0997071	0.0163159	6.11104	1.26e-09
CLYBL	gender	-0.0981858	0.015027	-6.53394	8.77e-11
CMTM2	gender	0.183386	0.0254975	7.19232	1.01e-12
CMTM4	gender	0.116722	0.0111714	10.4483	1.04e-24
CMTM5	gender	0.210682	0.0373102	5.64678	1.96e-08
CMTM8	gender	0.115788	0.020533	5.63913	2.04e-08
CNN1	gender	0.794654	0.106569	7.45668	1.5e-13
CNOT1	gender	-0.0414369	0.00665694	-6.22462	6.26e-10
CNPY3	gender	0.0502225	0.00754613	6.6554	3.96e-11
COLQ	gender	-0.11252	0.0199024	-5.65361	1.88e-08
COPS8	gender	-0.0712908	0.00970991	-7.34207	3.45e-13
COQ3	gender	-0.0829823	0.0147078	-5.64205	2.01e-08
CPA3	gender	0.451767	0.0462203	9.77423	6.52e-22
CR1	gender	0.166478	0.0193334	8.61086	1.82e-17
CREB5	gender	0.0928991	0.0133043	6.98262	4.35e-12
CRKL	gender	0.0429888	0.00791811	5.42917	6.6e-08
CRY1	gender	-0.065049	0.0101838	-6.38748	2.25e-10
CST7	gender	-0.32467	0.0370929	-8.75289	5.53e-18
CTDSPL	gender	0.170614	0.0300376	5.68002	1.62e-08
CTNNAL1	gender	0.26503	0.0471872	5.61656	2.32e-08
CTNS	gender	0.0462432	0.00849356	5.4445	6.07e-08
CTSA	gender	0.0982382	0.0150237	6.53886	8.5e-11
CTSG	gender	-0.358052	0.0585489	-6.11545	1.23e-09
CTSL1	gender	-0.0962769	0.0185733	-5.18361	2.48e-07
CTSW	gender	-0.225905	0.0321787	-7.02033	3.35e-12
CTTN	gender	0.162601	0.0292879	5.55183	3.34e-08
CUZD1	gender	-0.241863	0.0467672	-5.17164	2.64e-07
CXCL5	gender	0.289866	0.0343191	8.4462	7.05e-17
CXCR7	gender	-0.360097	0.0242474	-14.8509	1.26e-46
CYB5A	gender	-0.0857448	0.00882258	-9.71879	1.09e-21
CYP11A1	gender	0.121289	0.0223746	5.42082	6.91e-08
CYP27A1	gender	0.109579	0.0198068	5.5324	3.73e-08
CYP2E1	gender	-0.399278	0.0759129	-5.25969	1.65e-07
CYSLTR1	gender	0.102672	0.0196271	5.23113	1.92e-07
CYTL1	gender	-0.37809	0.0668786	-5.65338	1.88e-08
DAAM1	gender	0.0911564	0.0169336	5.38316	8.49e-08
DAB2	gender	0.184843	0.0204268	9.04903	4.39e-19
DACH1	gender	0.0865539	0.0163545	5.29235	1.39e-07
DDEF1	gender	0.0828752	0.0137161	6.04219	1.92e-09
DDEF2	gender	0.175032	0.0280819	6.23291	5.95e-10
DDIT4	gender	-0.325301	0.02685	-12.1155	2.74e-32
DDX19B	gender	-0.042623	0.00695276	-6.13038	1.12e-09
DDX3X	gender	0.174035	0.0161783	10.7573	4.83e-26
DDX3Y	gender	-4.03502	0.0862266	-46.7955	1.11e-294
DDX43	gender	-1.07831	0.0990604	-10.8854	1.32e-26
DENND2C	gender	0.350126	0.0404718	8.65111	1.3e-17
DERL2	gender	-0.0686533	0.0122402	-5.60885	2.42e-08
DHRS9	gender	0.185081	0.020756	8.91699	1.37e-18
DIS3L	gender	-0.0413673	0.00784492	-5.27313	1.54e-07
DKFZP686I15217	gender	0.125937	0.0236145	5.33304	1.11e-07
DMAP1	gender	-0.043249	0.00709718	-6.09383	1.4e-09
DNM3	gender	0.295914	0.0352024	8.40605	9.79e-17
DPEP2	gender	0.0495772	0.00930459	5.32826	1.14e-07
DPEP3	gender	0.111	0.0194651	5.70254	1.42e-08
DPH2	gender	-0.0501805	0.00948937	-5.28807	1.42e-07
DSC2	gender	0.117248	0.0227592	5.15165	2.93e-07
DUS4L	gender	-0.0681691	0.0100594	-6.77669	1.77e-11
DUSP22	gender	0.0570545	0.00845425	6.74861	2.13e-11
DYRK4	gender	-0.0578927	0.0107247	-5.39806	7.83e-08
EDG8	gender	-0.430029	0.0505295	-8.51046	4.17e-17
EEF1B2	gender	-0.0394608	0.00691366	-5.70766	1.38e-08
EEF1D	gender	-0.0962652	0.0146172	-6.58573	6.26e-11
EEF2K	gender	0.0623902	0.00897064	6.95494	5.27e-12
EEPD1	gender	0.0933233	0.0138109	6.75723	2.01e-11
EFHC2	gender	0.562569	0.0306468	18.3565	5.31e-68
EGLN1	gender	0.0625918	0.0103424	6.05196	1.81e-09
EHD1	gender	0.0522246	0.0085227	6.12771	1.14e-09
EIF1AX	gender	0.344984	0.0175069	19.7056	5.42e-77
EIF1AY	gender	-7.55024	0.078864	-95.7376	0
EIF2AK1	gender	0.0732886	0.0101372	7.2297	7.71e-13
EIF2S3	gender	0.102195	0.00756782	13.504	2.76e-39
EIF3K	gender	-0.0367497	0.00702997	-5.22758	1.96e-07
ELA2	gender	-0.278073	0.0411831	-6.75212	2.08e-11
EMR3	gender	0.154592	0.0194602	7.94401	3.83e-15
ENOSF1	gender	-0.204543	0.0221682	-9.22688	9.26e-20
ENPP3	gender	0.913569	0.0979552	9.3264	3.83e-20
ENPP4	gender	-0.305669	0.0339348	-9.00755	6.29e-19
EPAS1	gender	0.254374	0.0251238	10.1248	2.4e-23
EPB42	gender	0.811147	0.12739	6.36745	2.55e-10
EPB49	gender	0.184641	0.0308704	5.98117	2.77e-09
EPHB3	gender	0.13416	0.0234735	5.71537	1.32e-08
EPOR	gender	0.111696	0.0142334	7.84741	8.06e-15
ERAF	gender	0.327229	0.0576593	5.67521	1.66e-08
ERBB2	gender	-0.352018	0.0471078	-7.4726	1.33e-13
ESAM	gender	0.2605	0.0304163	8.56449	2.67e-17
EVL	gender	-0.143219	0.0145178	-9.86508	2.8e-22
EXOSC8	gender	-0.0421899	0.00821799	-5.13385	3.21e-07
F2RL3	gender	0.235905	0.024341	9.69167	1.4e-21
FAM104B	gender	0.0759969	0.0139349	5.4537	5.77e-08
FAM110A	gender	0.0486428	0.00919962	5.28748	1.42e-07
FAM124B	gender	0.0705052	0.0132969	5.30238	1.32e-07
FAM125B	gender	0.101984	0.015946	6.39555	2.14e-10
FAM24B	gender	-0.160525	0.0223055	-7.19666	9.75e-13
FAM46C	gender	0.226104	0.0297127	7.60968	4.85e-14
FAM69B	gender	0.193098	0.0263004	7.34203	3.45e-13
FAM70B	gender	0.0937113	0.0154865	6.05115	1.82e-09
FANCG	gender	-0.0574587	0.00857083	-6.70398	2.87e-11
FASLG	gender	-0.490156	0.068566	-7.14867	1.37e-12
FBL	gender	-0.0465703	0.00802611	-5.80235	7.98e-09
FBLN2	gender	-0.286215	0.0541741	-5.28324	1.46e-07
FBXO21	gender	-0.0443442	0.00585672	-7.57151	6.44e-14
FCGBP	gender	0.3481	0.0373914	9.30963	4.45e-20
FCGR2A	gender	0.0805915	0.00972522	8.28686	2.57e-16
FCGR2B	gender	0.341429	0.0254904	13.3944	1.03e-38
FCGR3B	gender	0.227005	0.031743	7.15134	1.34e-12
FCRLB	gender	0.2226	0.0285517	7.79637	1.19e-14
FERMT3	gender	0.0541373	0.0100788	5.3714	9.06e-08
FGFBP2	gender	-0.498526	0.0499277	-9.98498	9.06e-23
FHL2	gender	0.314008	0.030503	10.2943	4.69e-24
FKBP5	gender	-0.107119	0.0183667	-5.83225	6.7e-09
FLT3	gender	-0.134612	0.0249296	-5.39969	7.76e-08
FNTB	gender	0.0669249	0.0129181	5.18072	2.51e-07
FOLR2	gender	0.152589	0.0199347	7.65448	3.47e-14
FOXO3	gender	0.0600367	0.00892848	6.72418	2.51e-11
FRAG1	gender	-0.0510287	0.00895645	-5.69743	1.46e-08
FRAT2	gender	0.0485955	0.00797565	6.09298	1.41e-09
FRMD3	gender	0.135367	0.0263054	5.14598	3.02e-07
FRMD4B	gender	0.210346	0.0282585	7.44362	1.65e-13
GADD45A	gender	0.116339	0.0167108	6.96188	5.02e-12
GAS2L1	gender	0.132891	0.0189694	7.00552	3.72e-12
GAST	gender	0.110796	0.0211603	5.23605	1.88e-07
GATA1	gender	0.360105	0.0443865	8.11295	1.02e-15
GATA2	gender	0.624295	0.0403881	15.4574	4.24e-50
GFI1B	gender	0.20121	0.0280307	7.17821	1.11e-12
GK	gender	0.110199	0.0145265	7.58608	5.78e-14
GLUL	gender	0.118855	0.0186874	6.36018	2.68e-10
GMPR	gender	0.171705	0.0274383	6.25785	5.09e-10
GNA15	gender	0.0545298	0.00895947	6.08627	1.47e-09
GNAO1	gender	0.285021	0.0526583	5.41266	7.23e-08
GNG11	gender	0.156906	0.0269237	5.82782	6.87e-09
GNG8	gender	0.212644	0.0304653	6.97985	4.44e-12
GNLY	gender	-0.27688	0.0465845	-5.94361	3.47e-09
GOLGA8B	gender	-0.155974	0.0221296	-7.0482	2.76e-12
GOT1	gender	-0.0948419	0.00997948	-9.50369	7.79e-21
GP1BA	gender	0.127124	0.0246049	5.1666	2.71e-07
GP6	gender	0.215844	0.0345154	6.25355	5.23e-10
GP9	gender	0.183558	0.0294107	6.24119	5.65e-10
GPER	gender	-0.170988	0.025049	-6.82613	1.27e-11
GPR160	gender	-0.09494	0.0169145	-5.61293	2.37e-08
GPR44	gender	0.140908	0.0272758	5.16605	2.71e-07
GPR56	gender	-0.409199	0.040994	-9.98193	9.33e-23
GPR97	gender	0.357065	0.0612406	5.83053	6.76e-09
GPX1	gender	0.066108	0.0129378	5.10966	3.65e-07
GRAP	gender	-0.0531316	0.0102104	-5.20368	2.23e-07
GRAP2	gender	0.20262	0.0278215	7.28286	5.28e-13
GRB14	gender	0.132108	0.0206895	6.38525	2.28e-10
GRTP1	gender	0.359978	0.0657506	5.47491	5.13e-08
GSPT2	gender	-0.0734416	0.0125511	-5.85139	5.99e-09
GTPBP3	gender	-0.0554333	0.00808707	-6.85456	1.04e-11
GTPBP4	gender	-0.0368275	0.00697475	-5.28012	1.48e-07
GZMA	gender	-0.293377	0.044835	-6.54348	8.25e-11
GZMB	gender	-0.122823	0.0232566	-5.28123	1.47e-07
GZMH	gender	-0.469869	0.0496413	-9.46529	1.1e-20
GZMM	gender	-0.383016	0.0668422	-5.73015	1.21e-08
H1F0	gender	0.133415	0.0197187	6.76588	1.9e-11
H3F3A	gender	0.0262519	0.00404548	6.48918	1.17e-10
HAL	gender	0.0895704	0.0129742	6.90374	7.48e-12
HARS	gender	-0.0528699	0.00845431	-6.2536	5.23e-10
HBG1	gender	0.448444	0.0730544	6.1385	1.07e-09
HBG2	gender	0.445463	0.0773176	5.76147	1.01e-08
HBM	gender	0.372649	0.0701658	5.31098	1.26e-07
HBQ1	gender	0.195525	0.0353884	5.5251	3.88e-08
HDC	gender	0.688954	0.0498951	13.808	6.75e-41
HDHD1A	gender	0.40107	0.0118294	33.9044	3.5e-187
HEXIM2	gender	0.23304	0.0201831	11.5463	1.35e-29
HIST1H1C	gender	0.174457	0.0225123	7.74941	1.7e-14
HIST1H2AC	gender	0.150084	0.0247962	6.05267	1.8e-09
HIST1H2AE	gender	0.232809	0.0386823	6.01849	2.21e-09
HIST1H2BC	gender	0.16	0.0294535	5.43231	6.49e-08
HIST1H2BD	gender	0.24649	0.0316198	7.79545	1.2e-14
HIST1H2BH	gender	0.254226	0.0288315	8.81765	3.2e-18
HIST1H2BK	gender	0.100979	0.0156337	6.45907	1.42e-10
HIST1H2BN	gender	0.279208	0.0454295	6.14596	1.02e-09
HIST1H3D	gender	0.208922	0.0240521	8.68622	9.69e-18
HIST1H3F	gender	0.169888	0.026793	6.34077	3.02e-10
HIST1H3H	gender	0.179276	0.0282199	6.35284	2.8e-10
HIST1H4E	gender	0.353339	0.0656215	5.3845	8.43e-08
HIST1H4H	gender	0.381815	0.042121	9.06472	3.83e-19
HIST1H4K	gender	0.0918555	0.0159918	5.74392	1.12e-08
HIST2H2AA3	gender	0.112196	0.0152606	7.35201	3.21e-13
HIST2H2AC	gender	0.0925053	0.0141222	6.55035	7.89e-11
HIST2H2BE	gender	0.137581	0.0236635	5.81405	7.45e-09
HIST2H4A	gender	0.150214	0.0238321	6.303	3.84e-10
HIST3H2A	gender	0.117976	0.0207723	5.67948	1.62e-08
HMGCS1	gender	-0.0646361	0.0120596	-5.35973	9.65e-08
HOPX	gender	-0.218187	0.041388	-5.27174	1.55e-07
HOXA9	gender	0.251031	0.0302771	8.29111	2.48e-16
HOXB6	gender	0.196836	0.0229429	8.57937	2.36e-17
HPGD	gender	0.231256	0.0292197	7.91441	4.81e-15
HSD17B8	gender	-0.0761485	0.0141336	-5.38778	8.28e-08
HSPA1B	gender	0.0762075	0.0125846	6.05563	1.77e-09
HSPA6	gender	0.159297	0.0163342	9.75235	7.99e-22
HSPB1	gender	0.0902643	0.0152239	5.92911	3.78e-09
HSPC159	gender	0.281449	0.0425595	6.61307	5.23e-11
HVCN1	gender	0.0477586	0.0079733	5.98981	2.63e-09
ID2	gender	-0.0856486	0.0112427	-7.61816	4.55e-14
IFIT1L	gender	0.875018	0.133157	6.57134	6.88e-11
IFNG	gender	-0.804014	0.10716	-7.50296	1.07e-13
IFRD1	gender	0.0986824	0.015362	6.42378	1.78e-10
IGF2BP2	gender	0.0933902	0.0151443	6.16668	8.97e-10
IGF2BP3	gender	0.17857	0.0229277	7.7884	1.26e-14
IL12RB1	gender	-0.0952733	0.0117021	-8.14154	8.17e-16
IL2RB	gender	-0.292023	0.042344	-6.89643	7.86e-12
IL4	gender	1.43089	0.106636	13.4184	7.74e-39
IL5RA	gender	0.231537	0.0290383	7.97353	3.05e-15
IL7R	gender	0.476037	0.084434	5.63798	2.06e-08
IL8	gender	0.292232	0.0430382	6.79006	1.61e-11
IL8RB	gender	0.131195	0.0249202	5.26462	1.61e-07
IL8RBP	gender	0.158865	0.0239681	6.62817	4.74e-11
ILVBL	gender	-0.0657782	0.00779893	-8.43426	7.78e-17
IMP4	gender	-0.0551867	0.00894075	-6.17249	8.65e-10
ING2	gender	0.0514455	0.00884288	5.81773	7.29e-09
INPP5A	gender	0.0581566	0.0108899	5.34043	1.07e-07
IRAK2	gender	0.129323	0.0172258	7.50754	1.03e-13
ISCU	gender	0.032758	0.00592127	5.53227	3.73e-08
ITK	gender	-0.253936	0.0356076	-7.13151	1.54e-12
ITM2A	gender	0.124623	0.023293	5.35023	1.02e-07
JAM3	gender	0.261296	0.0351803	7.42734	1.86e-13
JARID1B	gender	0.0503442	0.00927715	5.42669	6.69e-08
JARID1C	gender	0.33752	0.0320019	10.5469	3.95e-25
JARID1D	gender	-7.41603	0.0766641	-96.7341	0
JSRP1	gender	0.370266	0.0537694	6.88619	8.43e-12
JTV1	gender	-0.0467299	0.00677699	-6.89537	7.92e-12
KCNH3	gender	0.126316	0.017213	7.33838	3.54e-13
KCNJ15	gender	0.220402	0.0341052	6.46241	1.39e-10
KCNK6	gender	0.0589742	0.00841741	7.00622	3.7e-12
KCNMB1	gender	-0.0501281	0.00895291	-5.59908	2.56e-08
KIF2A	gender	0.170224	0.0217021	7.84366	8.29e-15
KIR2DL1	gender	-0.597054	0.0659445	-9.0539	4.21e-19
KIR2DL3	gender	-0.500488	0.0468036	-10.6934	9.17e-26
KIR2DL4	gender	-0.421393	0.0402027	-10.4817	7.51e-25
KIR2DL5A	gender	-0.730875	0.0839835	-8.70259	8.45e-18
KIR2DS1	gender	-0.690609	0.098583	-7.00535	3.72e-12
KIR2DS5	gender	-0.509112	0.0649517	-7.83832	8.64e-15
KIR3DL1	gender	-0.471698	0.0551469	-8.55347	2.92e-17
KIR3DL2	gender	-0.366938	0.0625307	-5.86814	5.42e-09
KIR3DL3	gender	-0.465469	0.0623229	-7.46867	1.37e-13
KLF12	gender	-0.132859	0.0229988	-5.77679	9.26e-09
KLF15	gender	0.140041	0.0248585	5.63351	2.11e-08
KLHDC8B	gender	0.0799559	0.0131778	6.06747	1.65e-09
KLHL5	gender	0.0584373	0.00846659	6.9021	7.56e-12
KLHL6	gender	0.0652305	0.0123421	5.2852	1.44e-07
KLRB1	gender	-0.2599	0.0423848	-6.13192	1.11e-09
KLRC1	gender	-0.526242	0.0852532	-6.17269	8.64e-10
KLRD1	gender	-0.389266	0.0506661	-7.68297	2.8e-14
KLRF1	gender	-0.324686	0.0393123	-8.25915	3.2e-16
KRT1	gender	0.773613	0.123563	6.26088	5e-10
KRT72	gender	-0.4769	0.053114	-8.97881	8.06e-19
KRT73	gender	-0.717441	0.0898917	-7.98117	2.87e-15
KRT86	gender	0.544267	0.096298	5.6519	1.9e-08
LANCL1	gender	-0.0679723	0.010808	-6.28907	4.19e-10
LAPTM4B	gender	0.115552	0.0204766	5.6431	2e-08
LASS2	gender	0.0586897	0.0113273	5.18125	2.51e-07
LAT	gender	0.135151	0.0227815	5.9325	3.7e-09
LAX1	gender	-0.213014	0.0410566	-5.18829	2.41e-07
LCN2	gender	0.17136	0.0299212	5.72704	1.23e-08
LDLR	gender	0.114003	0.016033	7.11053	1.79e-12
LDLRAP1	gender	0.107489	0.0190493	5.64268	2e-08
LEFTY1	gender	0.371238	0.0517397	7.1751	1.14e-12
LGALS12	gender	0.212421	0.0187757	11.3136	1.58e-28
LGR6	gender	-0.409474	0.069118	-5.92428	3.89e-09
LIMS1	gender	0.129423	0.0151098	8.56551	2.65e-17
LINGO2	gender	-0.751696	0.10774	-6.97697	4.52e-12
LIPA	gender	-0.0984263	0.0183456	-5.3651	9.37e-08
LMNA	gender	0.219727	0.0224886	9.77062	6.74e-22
LPAR5	gender	0.153772	0.0237901	6.4637	1.38e-10
LPL	gender	-0.42064	0.0492616	-8.5389	3.3e-17
LPXN	gender	-0.0753064	0.00712478	-10.5696	3.15e-25
LRBA	gender	0.10823	0.0184846	5.85518	5.85e-09
LRG1	gender	0.0959255	0.0172999	5.54485	3.48e-08
LRRC28	gender	0.0653697	0.0121556	5.37775	8.75e-08
LRRFIP2	gender	0.0583322	0.0113574	5.13607	3.18e-07
LUC7L	gender	-0.0431933	0.00838734	-5.14982	2.96e-07
LXN	gender	0.0790994	0.0154461	5.12099	3.44e-07
LY6G5C	gender	0.1398	0.0157929	8.8521	2.39e-18
LYPLAL1	gender	0.0641958	0.00870211	7.37704	2.68e-13
LYRM1	gender	0.0405706	0.00756516	5.36283	9.49e-08
LYRM4	gender	-0.103768	0.0158074	-6.56454	7.19e-11
MAGED1	gender	-0.0745241	0.00967135	-7.70566	2.36e-14
MAP1A	gender	0.213928	0.0249037	8.5902	2.16e-17
MAP1LC3A	gender	0.180352	0.0164295	10.9773	5.17e-27
MAP4K1	gender	-0.116284	0.0125544	-9.26243	6.76e-20
MAST4	gender	0.24373	0.0425473	5.72844	1.22e-08
MATK	gender	-0.246152	0.0369379	-6.66394	3.74e-11
MAX	gender	0.11562	0.0160042	7.22438	8.01e-13
MCM3	gender	-0.0538025	0.00795277	-6.76526	1.91e-11
MCM3AP	gender	-0.0376984	0.00677133	-5.56736	3.06e-08
MDC1	gender	-0.0928273	0.011529	-8.05164	1.66e-15
MED25	gender	0.0601731	0.010354	5.81156	7.56e-09
MEIS1	gender	0.252832	0.0267463	9.45295	1.23e-20
MEPCE	gender	0.065006	0.00982925	6.61353	5.22e-11
MFAP3L	gender	0.202014	0.037212	5.42873	6.62e-08
MGMT	gender	-0.0792557	0.0132491	-5.98198	2.76e-09
MID1IP1	gender	0.0573439	0.00829459	6.91341	7e-12
MIF	gender	-0.0531834	0.0098426	-5.40339	7.6e-08
MLSTD1	gender	0.0800225	0.0125524	6.37508	2.43e-10
MMACHC	gender	-0.0787178	0.0147424	-5.33955	1.08e-07
MMD	gender	0.152479	0.022566	6.75701	2.02e-11
MMEL1	gender	-0.742904	0.050327	-14.7615	4.01e-46
MMP23B	gender	-0.147702	0.0259573	-5.6902	1.53e-08
MMP25	gender	0.228958	0.0235676	9.71498	1.13e-21
MMP9	gender	0.683316	0.0508129	13.4477	5.44e-39
MOBKL2C	gender	0.0799777	0.0108238	7.38905	2.45e-13
MPHOSPH1	gender	-0.0684771	0.0128574	-5.3259	1.16e-07
MPL	gender	0.228786	0.0321088	7.12534	1.61e-12
MPO	gender	-0.165803	0.0200238	-8.28031	2.7e-16
MPP1	gender	0.10833	0.0144542	7.4947	1.14e-13
MPZL2	gender	-0.0763413	0.0145874	-5.23336	1.9e-07
MRPL1	gender	-0.0885497	0.0172833	-5.12341	3.39e-07
MRPL11	gender	-0.0466449	0.00632087	-7.3795	2.63e-13
MRPS27	gender	-0.0512929	0.00907681	-5.65099	1.91e-08
MRPS28	gender	-0.0484758	0.00870542	-5.56846	3.04e-08
MS4A2	gender	0.694539	0.0566929	12.2509	6.05e-33
MS4A3	gender	0.972404	0.0702685	13.8384	4.65e-41
MSRB3	gender	0.19381	0.0252428	7.67785	2.91e-14
MST150	gender	0.0862734	0.0157979	5.46108	5.54e-08
MTHFD1L	gender	-0.085123	0.0148008	-5.75124	1.07e-08
MTHFD2L	gender	0.0776998	0.0132296	5.87319	5.26e-09
MTMR10	gender	-0.0771086	0.0137944	-5.58986	2.7e-08
MTP18	gender	-0.07415	0.00916976	-8.08636	1.26e-15
MVD	gender	-0.0926369	0.0180524	-5.13155	3.25e-07
MXD1	gender	0.118468	0.0146478	8.08778	1.25e-15
MXI1	gender	0.142345	0.0211289	6.73697	2.3e-11
MYADM	gender	0.123335	0.0106324	11.5999	7.6e-30
MYBPH	gender	0.309445	0.0371901	8.32064	1.95e-16
MYH10	gender	-0.477394	0.0893579	-5.34249	1.06e-07
MYL4	gender	0.651638	0.117158	5.56203	3.16e-08
MYL6B	gender	-0.055753	0.0103899	-5.36606	9.32e-08
MYLK	gender	0.16767	0.0277118	6.05048	1.82e-09
MYOM1	gender	0.159942	0.0192399	8.31303	2.08e-16
MYOM2	gender	-0.316061	0.0522053	-6.05419	1.78e-09
NAT10	gender	-0.0585796	0.00922997	-6.34668	2.91e-10
NCALD	gender	-0.341785	0.0581399	-5.87866	5.1e-09
NCF1	gender	0.105197	0.0161284	6.52245	9.45e-11
NCF1B	gender	0.123522	0.0171808	7.18951	1.03e-12
NCF1C	gender	0.0906031	0.014154	6.40122	2.06e-10
NCK2	gender	0.160595	0.0190903	8.41242	9.29e-17
NCOA4	gender	0.0700048	0.00962065	7.27652	5.52e-13
NCR3	gender	-0.392081	0.0662155	-5.92129	3.96e-09
NDUFV1	gender	-0.0802051	0.013682	-5.8621	5.62e-09
NFE2	gender	0.0520672	0.00989019	5.26454	1.61e-07
NFIX	gender	0.0905417	0.0168859	5.36198	9.53e-08
NGFRAP1	gender	0.177421	0.0246129	7.20846	8.97e-13
NIF3L1	gender	-0.0373649	0.00626631	-5.96282	3.09e-09
NIT2	gender	-0.0626056	0.0102087	-6.13257	1.11e-09
NKG7	gender	-0.291206	0.0331555	-8.78304	4.29e-18
NLRP12	gender	0.0575731	0.0108787	5.29229	1.39e-07
NLRP7	gender	0.149392	0.028693	5.20658	2.19e-07
NLRX1	gender	0.0427549	0.00746115	5.73034	1.21e-08
NME1-NME2	gender	-0.0692084	0.0100542	-6.88354	8.58e-12
NMRAL1	gender	-0.0633434	0.0115224	-5.49741	4.53e-08
NMUR1	gender	-0.434584	0.0660679	-6.57785	6.59e-11
NOL6	gender	-0.0479503	0.00775187	-6.18564	7.98e-10
NOTCH3	gender	-0.37612	0.0707185	-5.31855	1.21e-07
NPL	gender	0.0630178	0.0110361	5.71013	1.36e-08
NPM3	gender	-0.108627	0.0184434	-5.88972	4.77e-09
NQO1	gender	-0.200207	0.0318517	-6.28559	4.28e-10
NSMCE4A	gender	-0.0474436	0.00791973	-5.99056	2.62e-09
NT5C	gender	-0.044401	0.00816048	-5.44098	6.19e-08
NT5C3	gender	0.127344	0.0206789	6.15818	9.45e-10
NUAK2	gender	0.0658076	0.0110657	5.94701	3.4e-09
NUP210	gender	-0.0701393	0.0114379	-6.13217	1.11e-09
ODC1	gender	0.164754	0.0221725	7.43054	1.82e-13
OLIG1	gender	0.149682	0.0216853	6.90248	7.54e-12
OPLAH	gender	0.116679	0.0131361	8.88235	1.84e-18
ORMDL1	gender	-0.043791	0.00854944	-5.12208	3.42e-07
OSBP2	gender	0.391361	0.0525872	7.44212	1.67e-13
OSBPL7	gender	-0.0657126	0.0113106	-5.80981	7.64e-09
OSCAR	gender	0.0618657	0.0118069	5.2398	1.84e-07
P117	gender	-0.0521592	0.0100598	-5.1849	2.46e-07
P2RY12	gender	0.147337	0.0283743	5.19263	2.36e-07
P2RY8	gender	-0.103224	0.0136971	-7.53616	8.36e-14
PANX2	gender	0.156293	0.019128	8.17092	6.47e-16
PARP1	gender	-0.0610086	0.00720423	-8.46844	5.88e-17
PARP2	gender	-0.0821957	0.0143002	-5.74787	1.09e-08
PBX1	gender	0.259192	0.0316617	8.18629	5.73e-16
PBX3	gender	0.0545314	0.00988965	5.51398	4.13e-08
PC	gender	0.244773	0.0430191	5.68986	1.53e-08
PCCA	gender	-0.0482844	0.00902667	-5.34909	1.02e-07
PDE4B	gender	0.0676739	0.013263	5.10245	3.78e-07
PDE5A	gender	0.191764	0.0272095	7.04769	2.77e-12
PDGFA	gender	0.172174	0.0305875	5.62891	2.16e-08
PDGFC	gender	0.0865124	0.016857	5.13213	3.24e-07
PDGFRB	gender	-0.362693	0.0286573	-12.6562	6.09e-35
PDHA1	gender	-0.0413764	0.00798799	-5.17983	2.52e-07
PDLIM1	gender	0.140153	0.0249497	5.61742	2.31e-08
PDZD4	gender	-0.400687	0.075098	-5.33552	1.1e-07
PDZK1IP1	gender	0.309067	0.046732	6.6136	5.22e-11
PEAR1	gender	0.237792	0.0372747	6.37945	2.37e-10
PER3	gender	-0.249675	0.0237383	-10.5178	5.26e-25
PERLD1	gender	-0.0524808	0.00983365	-5.33686	1.09e-07
PF4V1	gender	0.25267	0.0422455	5.981	2.77e-09
PFAS	gender	-0.104182	0.0109763	-9.49156	8.69e-21
PFDN6	gender	-0.163019	0.0246982	-6.60045	5.69e-11
PFKM	gender	-0.0803776	0.0129088	-6.22658	6.19e-10
PGLYRP1	gender	0.305745	0.0546686	5.5927	2.66e-08
PGRMC1	gender	0.10148	0.0190656	5.32267	1.18e-07
PIGT	gender	-0.0374367	0.00617066	-6.06689	1.65e-09
PIGU	gender	-0.0453507	0.00887443	-5.11027	3.63e-07
PIM1	gender	0.118726	0.0172745	6.87287	9.22e-12
PIP5K2A	gender	0.138963	0.017495	7.94303	3.86e-15
PITPNA	gender	-0.0453332	0.00853553	-5.31112	1.25e-07
PLAC8	gender	-0.11051	0.0149413	-7.39628	2.33e-13
PLCH2	gender	-0.148046	0.0175381	-8.44137	7.34e-17
PLCXD1	gender	-0.0955261	0.0152371	-6.2693	4.74e-10
PLEKHA1	gender	-0.0756646	0.0104803	-7.21969	8.28e-13
PLEKHF1	gender	-0.367764	0.048392	-7.59969	5.22e-14
PLEKHG2	gender	-0.193058	0.0323813	-5.96203	3.11e-09
PLEKHO1	gender	0.0402375	0.00745275	5.39902	7.79e-08
PLOD2	gender	0.318536	0.055991	5.68906	1.54e-08
PLXDC2	gender	0.0606516	0.0113543	5.34173	1.06e-07
PMM2	gender	0.0734889	0.0142045	5.17362	2.61e-07
PMP22	gender	0.134354	0.0230418	5.83088	6.75e-09
PNMA1	gender	0.155777	0.0230465	6.75922	1.99e-11
PNPLA4	gender	0.461005	0.061249	7.52674	8.97e-14
POLR1E	gender	-0.0589114	0.00908965	-6.48115	1.23e-10
POMGNT1	gender	-0.0557776	0.00831778	-6.70583	2.84e-11
POMP	gender	-0.0463906	0.00904685	-5.12782	3.32e-07
PPARG	gender	-0.35763	0.0576298	-6.20566	7.05e-10
PPP1R12C	gender	-0.0792908	0.0139574	-5.68092	1.61e-08
PPP1R15A	gender	0.0927712	0.00993379	9.33895	3.42e-20
PRDM1	gender	-0.124702	0.0186126	-6.69989	2.95e-11
PRDX2	gender	0.104208	0.0204062	5.10668	3.7e-07
PRDX4	gender	-0.0723894	0.00971884	-7.44836	1.59e-13
PRDX6	gender	0.0754968	0.0131593	5.73714	1.16e-08
PRF1	gender	-0.399384	0.0463138	-8.62343	1.64e-17
PRIC285	gender	0.111102	0.0158319	7.01761	3.42e-12
PRKCH	gender	-0.130648	0.0236068	-5.53433	3.69e-08
PRKX	gender	0.260869	0.0118196	22.0708	1.3e-93
PRKY	gender	-5.01446	0.0858199	-58.43	0
PRNPIP	gender	-0.0489908	0.00903953	-5.41962	6.96e-08
PROK2	gender	0.280508	0.0279272	10.0443	5.17e-23
PRPS2	gender	-0.0597509	0.0109269	-5.46824	5.32e-08
PRR5	gender	-0.172915	0.0221107	-7.82042	9.9e-15
PRSS23	gender	-0.474564	0.0871695	-5.44415	6.08e-08
PRTN3	gender	-0.353652	0.0610911	-5.78893	8.62e-09
PRUNE	gender	0.149508	0.0217469	6.8749	9.1e-12
PTCRA	gender	0.242228	0.0261771	9.25342	7.32e-20
PTGDR	gender	-0.371291	0.0707714	-5.24634	1.78e-07
PTGIR	gender	0.121942	0.0200526	6.08111	1.51e-09
PTK2	gender	0.250562	0.0161261	15.5377	1.45e-50
PTK6	gender	0.122171	0.0128184	9.53089	6.09e-21
PTP4A3	gender	-0.113395	0.0200347	-5.65994	1.81e-08
PTPN4	gender	-0.126356	0.0182583	-6.92048	6.67e-12
PTPN7	gender	-0.108957	0.0164597	-6.61964	5.01e-11
PTPRCAP	gender	-0.120034	0.0226239	-5.30564	1.29e-07
PTPRE	gender	0.0364738	0.00672506	5.42357	6.81e-08
PTTG1IP	gender	0.0414366	0.00553476	7.4866	1.2e-13
PVRIG	gender	-0.452999	0.0731508	-6.19267	7.64e-10
PWP1	gender	-0.0618554	0.0117267	-5.27473	1.53e-07
PYHIN1	gender	-0.344738	0.0423281	-8.14442	7.98e-16
QARS	gender	-0.0400545	0.00698074	-5.73785	1.16e-08
QTRT1	gender	-0.138011	0.0265951	-5.18937	2.4e-07
RAB11A	gender	0.0670134	0.011491	5.83181	6.71e-09
RAB11FIP1	gender	0.095776	0.00805602	11.8888	3.33e-31
RAB11FIP3	gender	0.0866388	0.0113339	7.64419	3.75e-14
RAB11FIP5	gender	0.303793	0.045829	6.62883	4.72e-11
RAB32	gender	0.0595916	0.00928621	6.41721	1.86e-10
RAB4A	gender	0.0803406	0.0143931	5.58187	2.82e-08
RABGAP1L	gender	0.133085	0.0203141	6.55134	7.84e-11
RANBP1	gender	-0.0406728	0.00787599	-5.16414	2.74e-07
RASGRP1	gender	-0.23842	0.0391208	-6.09445	1.4e-09
RBM38	gender	0.0987804	0.0181393	5.44566	6.03e-08
RDH11	gender	0.0533673	0.00934773	5.70912	1.37e-08
RELB	gender	0.0606493	0.0107238	5.65556	1.86e-08
REPS2	gender	0.0869063	0.0127977	6.79078	1.61e-11
RFC4	gender	-0.0635357	0.0105611	-6.016	2.25e-09
RFX2	gender	0.173017	0.025104	6.89204	8.1e-12
RGPD1	gender	0.673943	0.0992697	6.78901	1.63e-11
RGS10	gender	0.088737	0.0136455	6.503	1.07e-10
RGS18	gender	0.120793	0.0198684	6.07964	1.53e-09
RGS2	gender	0.0650706	0.0120004	5.42235	6.85e-08
RHOBTB3	gender	-0.169722	0.0322634	-5.2605	1.65e-07
RICS	gender	0.07681	0.0136862	5.61223	2.38e-08
RILPL1	gender	0.122221	0.0214314	5.70288	1.42e-08
RNASEH1	gender	-0.0572009	0.00974903	-5.86734	5.45e-09
RNF24	gender	0.0652799	0.0118669	5.50099	4.44e-08
ROPN1L	gender	0.287445	0.0259301	11.0854	1.7e-27
RORA	gender	-0.210105	0.0398425	-5.27341	1.54e-07
RPA1	gender	0.0843605	0.0150809	5.59385	2.64e-08
RPGRIP1	gender	0.110058	0.0178089	6.17995	8.26e-10
RPL39L	gender	-0.0973199	0.0132479	-7.34604	3.35e-13
RPS4X	gender	0.223204	0.0237899	9.3823	2.32e-20
RPS4Y1	gender	-5.58963	0.0602982	-92.6997	0
RPS4Y2	gender	-1.67011	0.0230819	-72.3558	0
RPUSD2	gender	-0.0418872	0.00724546	-5.78116	9.02e-09
RRM2	gender	0.378705	0.0699436	5.41444	7.16e-08
RRP15	gender	-0.0582611	0.0113991	-5.11104	3.62e-07
RTN1	gender	-0.0626743	0.0117752	-5.32256	1.18e-07
RUFY1	gender	0.122486	0.0208374	5.87816	5.11e-09
RYR1	gender	-0.118619	0.0200311	-5.92172	3.95e-09
S100P	gender	0.221916	0.0375393	5.91156	4.2e-09
SAAL1	gender	-0.0490622	0.00862878	-5.68588	1.56e-08
SAMD3	gender	-0.303577	0.0515265	-5.89167	4.72e-09
SARS2	gender	-0.0914107	0.0131075	-6.97395	4.62e-12
SAV1	gender	0.121031	0.0216202	5.59804	2.58e-08
SBK1	gender	-0.417966	0.0493276	-8.47327	5.65e-17
SC4MOL	gender	-0.0751571	0.0117513	-6.39566	2.14e-10
SCCPDH	gender	0.0799256	0.0135327	5.90609	4.33e-09
SCGB1C1	gender	0.18529	0.0359152	5.15908	2.82e-07
SCML1	gender	-0.121652	0.0212272	-5.73094	1.21e-08
SCNN1A	gender	-0.185702	0.0266158	-6.97714	4.52e-12
SDPR	gender	0.123033	0.0213626	5.75928	1.02e-08
SEC14L1	gender	0.0671689	0.00751979	8.93229	1.2e-18
SELP	gender	0.244122	0.0349164	6.99163	4.09e-12
SEPSECS	gender	-0.12677	0.0221185	-5.73139	1.2e-08
2004-09-01	gender	0.130236	0.0202206	6.44075	1.6e-10
SERPINE1	gender	0.332946	0.0595999	5.58636	2.75e-08
SF4	gender	-0.0637399	0.00932747	-6.83356	1.2e-11
SFRS14	gender	-0.0396642	0.00606161	-6.54352	8.24e-11
SFTPD	gender	-0.143759	0.0224946	-6.39083	2.2e-10
SGK	gender	0.0990058	0.013011	7.60938	4.86e-14
SH2D1A	gender	-0.118172	0.0190891	-6.19055	7.74e-10
SH2D1B	gender	-0.202395	0.0276588	-7.31756	4.11e-13
SH3BP4	gender	-0.103197	0.0179903	-5.73628	1.17e-08
SHMT2	gender	-0.036203	0.00703143	-5.14873	2.97e-07
SIAH2	gender	0.105546	0.0138926	7.59731	5.32e-14
SKAP1	gender	-0.28181	0.0420862	-6.69603	3.03e-11
SLA2	gender	0.193774	0.0300132	6.4563	1.45e-10
SLAIN1	gender	-0.162204	0.0232603	-6.97343	4.64e-12
SLAMF6	gender	-0.207469	0.0343454	-6.04065	1.94e-09
SLC1A7	gender	-0.418711	0.0702488	-5.9604	3.14e-09
SLC22A4	gender	0.0593316	0.0107645	5.51178	4.18e-08
SLC24A6	gender	-0.0409091	0.00776164	-5.27068	1.56e-07
SLC25A37	gender	0.106681	0.019396	5.50014	4.46e-08
SLC26A11	gender	0.0991475	0.0170585	5.8122	7.53e-09
SLC2A3	gender	0.114036	0.0114934	9.92186	1.64e-22
SLC31A2	gender	0.0470432	0.00909962	5.1698	2.66e-07
SLC40A1	gender	0.0809674	0.0152664	5.30362	1.31e-07
SLC44A1	gender	0.0449864	0.00875264	5.13975	3.12e-07
SLC45A3	gender	0.537284	0.0359185	14.9584	3.1e-47
SLC45A4	gender	0.0730049	0.0131713	5.54272	3.52e-08
SLC5A10	gender	-0.320758	0.0511641	-6.26921	4.74e-10
SLC6A4	gender	0.254285	0.0483947	5.25441	1.7e-07
SLC7A1	gender	-0.0692347	0.0116058	-5.96552	3.04e-09
SLC8A3	gender	0.254246	0.0412017	6.17077	8.74e-10
SMC1A	gender	0.214996	0.0263949	8.14534	7.93e-16
SMOX	gender	0.222866	0.0253195	8.80214	3.65e-18
SNCA	gender	0.144725	0.0213803	6.76909	1.86e-11
SNF8	gender	-0.101803	0.0155387	-6.55157	7.82e-11
SNRPA1	gender	-0.0356913	0.0064145	-5.56416	3.12e-08
SOCS3	gender	0.204394	0.0368958	5.53976	3.58e-08
SOD1	gender	-0.0503084	0.00751537	-6.69406	3.07e-11
SORBS3	gender	-0.0925253	0.0174552	-5.30071	1.33e-07
SORL1	gender	0.0652469	0.0121677	5.36229	9.51e-08
SORT1	gender	0.0854338	0.0138742	6.15775	9.47e-10
SOX15	gender	0.164027	0.0174363	9.40719	1.86e-20
SPESP1	gender	-0.480457	0.073018	-6.57998	6.5e-11
SPG3A	gender	0.230811	0.0249564	9.24857	7.64e-20
SPINT2	gender	0.0628003	0.0102363	6.13504	1.09e-09
SPIRE1	gender	0.0732357	0.0142828	5.12756	3.32e-07
SPOCD1	gender	0.240369	0.0277194	8.6715	1.1e-17
SPOCK2	gender	-0.286435	0.0384364	-7.45218	1.55e-13
SPON2	gender	-0.658278	0.0864774	-7.61214	4.76e-14
SPRYD5	gender	0.685657	0.04621	14.8379	1.49e-46
SPSB1	gender	0.360799	0.0538664	6.69804	2.99e-11
SSBP2	gender	0.0688389	0.00975105	7.05964	2.55e-12
ST14	gender	-0.105809	0.0183081	-5.77936	9.12e-09
STAT4	gender	-0.308875	0.0457638	-6.74933	2.12e-11
STK32B	gender	-0.10783	0.0184284	-5.85129	5.99e-09
STOML2	gender	-0.0463164	0.00761961	-6.07857	1.54e-09
STS	gender	0.259969	0.0336257	7.73125	1.95e-14
STXBP5	gender	0.070677	0.0112796	6.26591	4.84e-10
SUMF2	gender	-0.0441826	0.00826339	-5.34679	1.03e-07
SUSD3	gender	0.131305	0.0187344	7.00874	3.63e-12
SYNE2	gender	-0.180284	0.0287856	-6.263	4.93e-10
SYT11	gender	-0.0774865	0.0111086	-6.97538	4.57e-12
SYTL1	gender	-0.075183	0.0136229	-5.51886	4.02e-08
SYTL4	gender	0.326196	0.0356385	9.15293	1.77e-19
TAGAP	gender	0.0796416	0.0141541	5.62673	2.19e-08
TAL1	gender	0.232487	0.0330775	7.02853	3.17e-12
TBC1D10C	gender	-0.0532447	0.00997585	-5.33736	1.09e-07
TBL1X	gender	0.0718333	0.0088348	8.13072	8.9e-16
TBPL1	gender	0.0525047	0.0102107	5.14214	3.08e-07
TBRG4	gender	-0.0571303	0.011115	-5.13993	3.11e-07
TCN1	gender	1.44391	0.116388	12.406	1.06e-33
TEX101	gender	0.796356	0.117777	6.76158	1.95e-11
TFPI	gender	0.241889	0.0393295	6.15032	9.92e-10
TGFA	gender	0.156216	0.019896	7.85164	7.8e-15
TGFBR3	gender	-0.314472	0.0390707	-8.0488	1.69e-15
TKTL1	gender	-0.382099	0.060399	-6.32626	3.32e-10
TLK1	gender	0.0727942	0.0135649	5.36637	9.31e-08
TM6SF1	gender	0.0853329	0.0143341	5.95313	3.28e-09
TMCC2	gender	0.372245	0.0558273	6.6678	3.65e-11
TMCO4	gender	-0.112601	0.0178018	-6.32526	3.34e-10
TMED3	gender	-0.0524669	0.00867638	-6.04709	1.86e-09
TMEM140	gender	0.164097	0.0194054	8.45624	6.5e-17
TMEM14C	gender	-0.0469943	0.0085051	-5.52543	3.87e-08
TMEM158	gender	0.279784	0.0296107	9.44874	1.28e-20
TMEM185A	gender	0.0659741	0.0121645	5.42351	6.81e-08
TMEM38A	gender	0.414197	0.0525787	7.87767	6.39e-15
TMEM40	gender	0.298258	0.0321104	9.28852	5.36e-20
TMEM55A	gender	0.0728495	0.0130328	5.58971	2.7e-08
TMEM63A	gender	0.0880374	0.0146001	6.02991	2.07e-09
TMEM71	gender	0.0979212	0.0134525	7.27902	5.42e-13
TMEM91	gender	0.0780863	0.0125162	6.23882	5.73e-10
TMOD1	gender	0.241251	0.045292	5.32656	1.15e-07
TMSB4Y	gender	-5.97925	0.0788365	-75.8437	0
TNFAIP6	gender	0.143768	0.0255877	5.61865	2.29e-08
TNFRSF25	gender	-0.21426	0.0395529	-5.41705	7.06e-08
TNFSF4	gender	0.250132	0.0285715	8.7546	5.45e-18
TNNC2	gender	0.179765	0.0317764	5.65719	1.84e-08
TNNI2	gender	-0.148957	0.0210681	-7.07026	2.37e-12
TNS1	gender	0.266095	0.0325248	8.18129	5.96e-16
TNS3	gender	0.0527603	0.00824615	6.39818	2.1e-10
TOMM70A	gender	-0.0583915	0.00817185	-7.14544	1.4e-12
TP53TG3	gender	0.429711	0.0813609	5.28155	1.47e-07
TPM2	gender	0.142156	0.0197213	7.20826	8.98e-13
TPPP3	gender	0.151031	0.0180212	8.3807	1.2e-16
TPST2	gender	0.102614	0.0123794	8.28908	2.52e-16
TRAF5	gender	-0.154777	0.0192425	-8.04346	1.77e-15
TRAT1	gender	0.44413	0.0679182	6.53919	8.48e-11
TRIB3	gender	-0.0947081	0.0138507	-6.8378	1.17e-11
TRIM32	gender	-0.196856	0.0322779	-6.0988	1.36e-09
TRIM48	gender	0.717123	0.0936383	7.65843	3.37e-14
TRIM58	gender	0.227637	0.0302997	7.51284	9.93e-14
TRPM4	gender	0.233401	0.0220973	10.5624	3.38e-25
TRPM6	gender	1.36244	0.118373	11.5097	1.99e-29
TSC22D1	gender	0.214711	0.0231147	9.28897	5.34e-20
TSPAN13	gender	0.155577	0.0234994	6.62045	4.99e-11
TSPAN18	gender	0.274656	0.0310275	8.85201	2.39e-18
TSPAN33	gender	0.14994	0.0231901	6.4657	1.36e-10
TSPAN5	gender	0.335716	0.0381251	8.80564	3.54e-18
TTC16	gender	-0.0569543	0.0108163	-5.26559	1.6e-07
TTC27	gender	-0.0824087	0.0112904	-7.29899	4.7e-13
TTC4	gender	-0.0399259	0.00697966	-5.72032	1.28e-08
TTLL5	gender	-0.0557142	0.0108938	-5.11432	3.56e-07
TTTY14	gender	-0.867099	0.0836197	-10.3696	2.25e-24
TUBA4A	gender	0.117658	0.0197709	5.95108	3.32e-09
TUBB1	gender	0.150264	0.0206382	7.28088	5.35e-13
TXNL4B	gender	0.0848646	0.0161546	5.25329	1.71e-07
U2AF1L2	gender	0.141583	0.00902764	15.6832	2.04e-51
UBE1	gender	0.121805	0.0117572	10.36	2.47e-24
UBE2C	gender	0.188412	0.0359858	5.23572	1.88e-07
UBE2E3	gender	0.0554795	0.00925021	5.99765	2.51e-09
UBE2O	gender	0.0660801	0.0128548	5.14049	3.1e-07
UBL4A	gender	0.114103	0.0152126	7.50055	1.09e-13
UBXD4	gender	0.0870524	0.0166978	5.21341	2.11e-07
UNG	gender	-0.0863059	0.0161766	-5.33524	1.1e-07
UPK3A	gender	-0.151568	0.0257811	-5.87905	5.09e-09
UQCC	gender	-0.0397466	0.00738257	-5.38384	8.46e-08
UROS	gender	-0.0528333	0.00872644	-6.0544	1.78e-09
USP9Y	gender	-1.56128	0.0750865	-20.7931	1.66e-84
UTX	gender	0.467237	0.0211843	22.0558	1.67e-93
UTY	gender	-3.64041	0.0619771	-58.7381	0
VCL	gender	0.0852041	0.0145143	5.87037	5.35e-09
VEGFA	gender	0.0792461	0.0143579	5.51936	4.01e-08
VEGFC	gender	0.582925	0.113879	5.11882	3.48e-07
VENTX	gender	-0.0918635	0.0149242	-6.15534	9.62e-10
VNN2	gender	0.113323	0.0153739	7.37114	2.79e-13
VNN3	gender	0.130889	0.0201308	6.50191	1.08e-10
VWF	gender	0.229294	0.0311603	7.35853	3.06e-13
WASF3	gender	0.191944	0.0364701	5.26305	1.62e-07
WBSCR22	gender	-0.0542134	0.00983633	-5.51154	4.19e-08
WDR18	gender	-0.0584465	0.00872757	-6.69677	3.01e-11
WDR4	gender	-0.0504631	0.00970818	-5.198	2.29e-07
WNT5B	gender	0.124659	0.023637	5.27391	1.53e-07
XIST	gender	3.0149	0.0415845	72.5006	0
XK	gender	0.364044	0.0428294	8.49986	4.55e-17
XKR8	gender	0.0654004	0.011368	5.75305	1.06e-08
XPNPEP1	gender	0.0550884	0.0092293	5.96885	2.98e-09
YPEL3	gender	0.0831778	0.0103821	8.01163	2.27e-15
YPEL5	gender	0.0807273	0.0098696	8.17939	6.05e-16
ZAP70	gender	-0.326991	0.0429231	-7.61806	4.56e-14
ZBED1	gender	-0.0921614	0.00885064	-10.413	1.47e-24
ZBTB34	gender	0.0925543	0.0147418	6.27835	4.48e-10
ZDHHC1	gender	0.0802933	0.0132378	6.06544	1.67e-09
ZFX	gender	0.439681	0.0176271	24.9435	5.05e-115
ZFY	gender	-3.99888	0.0633451	-63.1286	0
ZFYVE20	gender	-0.037916	0.00743712	-5.09821	3.87e-07
ZNF30	gender	-0.20773	0.0404804	-5.13162	3.25e-07
ZNF573	gender	-0.128587	0.0204648	-6.28332	4.34e-10
ZNF621	gender	-0.0442557	0.00860787	-5.1413	3.09e-07
ZNF683	gender	-0.429582	0.0671255	-6.39969	2.08e-10
ZNF831	gender	-0.60669	0.0979057	-6.19668	7.45e-10
ZWILCH	gender	-0.0634578	0.0119528	-5.30901	1.27e-07
ACACA	age	-0.00268709	0.000403164	-6.66502	3.72e-11
ACADVL	age	0.00198171	0.000373829	5.30112	1.32e-07
ADAMTSL4	age	0.00360378	0.000594225	6.06468	1.67e-09
ADORA2A	age	0.00561132	0.0010773	5.20866	2.17e-07
AFF3	age	-0.00717089	0.000968078	-7.40735	2.15e-13
AGBL5	age	0.00409937	0.000702837	5.83261	6.68e-09
AGPAT4	age	0.003546	0.000629459	5.63342	2.11e-08
AHCY	age	-0.00245382	0.000411997	-5.95591	3.22e-09
ALDH5A1	age	-0.00891881	0.00169594	-5.25893	1.66e-07
ANXA1	age	0.00263574	0.000513646	5.13142	3.25e-07
APH1B	age	0.00308974	0.000432014	7.15195	1.34e-12
AQP10	age	0.0102768	0.0017777	5.78098	9.03e-09
AQP9	age	0.0048037	0.000759881	6.32164	3.41e-10
ARHGEF3	age	0.00231209	0.000451463	5.12132	3.43e-07
ARID5B	age	0.00708753	0.000921914	7.68785	2.7e-14
ARL4A	age	0.00506145	0.000821518	6.16109	9.28e-10
ARMC10	age	-0.00278407	0.000472003	-5.89842	4.54e-09
ARMCX1	age	-0.00439914	0.000732868	-6.00263	2.44e-09
ASIP	age	-0.0141679	0.00247477	-5.72494	1.25e-08
AXIN1	age	0.0029469	0.00055172	5.34129	1.07e-07
BATF3	age	0.00401305	0.000712554	5.63193	2.13e-08
BCAS4	age	-0.00476265	0.000885917	-5.37595	8.83e-08
BCL11A	age	-0.00463265	0.00051582	-8.98113	7.91e-19
BCL2L1	age	0.00433282	0.000848379	5.10717	3.69e-07
BCL6	age	0.00266137	0.000457537	5.81673	7.33e-09
BLK	age	-0.0165865	0.00238394	-6.95759	5.17e-12
BRI3BP	age	-0.00231561	0.000377952	-6.12673	1.15e-09
BTBD14A	age	0.00265903	0.000464802	5.72078	1.28e-08
BTBD6	age	0.00206307	0.000373559	5.52273	3.93e-08
BTLA	age	-0.00626342	0.00108266	-5.78523	8.81e-09
BZW2	age	-0.00198283	0.000356609	-5.56024	3.19e-08
C1QBP	age	-0.00206819	0.000388111	-5.32887	1.14e-07
C1RL	age	0.00360124	0.000512532	7.02637	3.22e-12
C3AR1	age	0.00671039	0.000965084	6.95317	5.33e-12
C5AR1	age	0.00308296	0.000592341	5.2047	2.21e-07
CA5B	age	0.00338242	0.000567878	5.95626	3.22e-09
CABIN1	age	0.0035808	0.000695371	5.14948	2.96e-07
CABP4	age	0.0156222	0.00205785	7.59155	5.55e-14
CACNA2D3	age	-0.00535504	0.000593794	-9.01836	5.73e-19
CAMK1G	age	-0.0117173	0.00225434	-5.19765	2.3e-07
CAPZB	age	0.00169189	0.000250941	6.74219	2.23e-11
CCDC50	age	-0.00488461	0.00057022	-8.56618	2.63e-17
CCND3	age	0.00265505	0.000441166	6.01826	2.22e-09
CCRK	age	0.00394422	0.000678537	5.81283	7.5e-09
CCT6A	age	-0.00260964	0.000453128	-5.75916	1.03e-08
CD19	age	-0.0114539	0.00221625	-5.16814	2.69e-07
CD1B	age	-0.00839586	0.00118834	-7.06521	2.46e-12
CD1C	age	-0.00506271	0.000752831	-6.72489	2.5e-11
CD1D	age	-0.00307522	0.000447458	-6.87265	9.24e-12
CD34	age	-0.00735083	0.00120648	-6.09278	1.41e-09
CD79A	age	-0.00769422	0.00146937	-5.23642	1.87e-07
CD97	age	0.00322015	0.00040439	7.96299	3.31e-15
CDC42EP4	age	0.00461806	0.000457672	10.0903	3.34e-23
CDH1	age	-0.0233083	0.00449709	-5.18298	2.48e-07
CDH23	age	0.00888925	0.00127949	6.94751	5.54e-12
CDKN1C	age	0.0111128	0.00118175	9.40374	1.92e-20
CEBPB	age	0.00249059	0.000399831	6.22909	6.09e-10
CHMP6	age	0.00275798	0.000425955	6.47481	1.29e-10
CKB	age	0.00863136	0.0012833	6.72593	2.48e-11
CLCF1	age	0.00484339	0.00077053	6.28579	4.28e-10
CLDN5	age	0.00795143	0.00141688	5.61195	2.38e-08
CLEC10A	age	-0.00493444	0.000766304	-6.43926	1.62e-10
CLEC4C	age	-0.0101275	0.00112772	-8.98052	7.95e-19
CLEC5A	age	-0.00658801	0.0011219	-5.87218	5.3e-09
COBLL1	age	-0.00839153	0.00109325	-7.67577	2.96e-14
COL6A3	age	0.0218023	0.00380757	5.72603	1.24e-08
COMMD10	age	-0.00235477	0.000440368	-5.34727	1.03e-07
CPT1A	age	0.00307476	0.000543289	5.65954	1.82e-08
CRADD	age	0.00313567	0.000410121	7.64572	3.71e-14
CRIP1	age	0.00578971	0.000595218	9.72704	1.01e-21
CRTAP	age	-0.00260581	0.000508161	-5.12792	3.31e-07
CTSL1	age	0.00582927	0.000837602	6.95947	5.11e-12
CUX2	age	-0.016462	0.00226627	-7.26392	6.04e-13
CX3CR1	age	0.00275618	0.00051708	5.33027	1.13e-07
CXCL16	age	0.00311953	0.000498115	6.26266	4.94e-10
CXCR3	age	-0.00800727	0.00118979	-6.73	2.41e-11
CYB561	age	0.0027905	0.000485229	5.7509	1.08e-08
CYP4F22	age	0.0213077	0.00208915	10.1992	1.18e-23
DARS	age	-0.00193783	0.000361692	-5.35768	9.76e-08
DBN1	age	0.00718913	0.00116008	6.1971	7.43e-10
DBT	age	-0.00295779	0.000554404	-5.33508	1.1e-07
DC2	age	-0.00363901	0.000630618	-5.77054	9.6e-09
DCBLD2	age	-0.00692958	0.00135636	-5.10895	3.66e-07
DDX27	age	-0.00463653	0.00067007	-6.91946	6.72e-12
DDX47	age	-0.00213832	0.000391884	-5.45651	5.68e-08
DENND1A	age	0.00209673	0.000406488	5.15815	2.83e-07
DGAT1	age	0.002877	0.00046352	6.20686	7e-10
DIMT1L	age	-0.0027623	0.000478346	-5.77469	9.37e-09
DNAJA3	age	-0.00166149	0.000298489	-5.56633	3.08e-08
DNAJB2	age	0.00276411	0.000408873	6.76031	1.97e-11
DNASE1L3	age	-0.011252	0.0012555	-8.96222	9.31e-19
DNTT	age	-0.0190144	0.00279384	-6.80583	1.45e-11
DPPA4	age	-0.0155733	0.00259096	-6.01064	2.32e-09
DRAP1	age	0.00319274	0.000458775	6.95926	5.11e-12
DSC2	age	0.00682522	0.00102783	6.64044	4.37e-11
DUSP1	age	0.00724729	0.000911537	7.95062	3.64e-15
E2F5	age	-0.00720326	0.00103304	-6.97285	4.66e-12
EDG4	age	0.003237	0.000512547	6.31553	3.55e-10
EDG6	age	0.00256517	0.000484002	5.29991	1.33e-07
EEF1B2	age	-0.00170166	0.000313734	-5.42388	6.8e-08
EHD1	age	0.00210279	0.000386732	5.43732	6.31e-08
EHD4	age	0.0030537	0.000511447	5.97071	2.95e-09
EI24	age	-0.00194779	0.000320472	-6.0779	1.54e-09
EIF3M	age	-0.00236985	0.000429166	-5.52198	3.95e-08
EIF5	age	-0.00354979	0.000601495	-5.9016	4.45e-09
ELMO2	age	0.00364634	0.000389472	9.36228	2.78e-20
EMP1	age	0.00765246	0.00117935	6.48869	1.18e-10
ENDOGL1	age	0.00500012	0.000822994	6.07553	1.57e-09
EPOR	age	0.00385341	0.000644555	5.97841	2.82e-09
EPS8	age	0.00997852	0.00119513	8.34931	1.55e-16
ERAF	age	0.0144633	0.00261552	5.52981	3.78e-08
F2RL3	age	0.00585697	0.00110505	5.30018	1.33e-07
FAIM	age	-0.010614	0.00197961	-5.36168	9.55e-08
FAM129C	age	-0.00946506	0.00105385	-8.9814	7.89e-19
FAM44B	age	-0.00181678	0.00031401	-5.78572	8.79e-09
FASN	age	-0.00374485	0.00072912	-5.13613	3.18e-07
FBL	age	-0.00242673	0.000362377	-6.6967	3.01e-11
FERMT3	age	0.00282105	0.000456037	6.18601	7.96e-10
FGFRL1	age	0.00662038	0.00104826	6.31561	3.55e-10
FLT3LG	age	0.00555212	0.000730023	7.60541	5.01e-14
FMNL2	age	0.0104771	0.00202719	5.16831	2.68e-07
FOXD2	age	0.0087403	0.00131302	6.65663	3.93e-11
FUCA1	age	-0.00453467	0.000671204	-6.75603	2.03e-11
GAS2L1	age	0.00475684	0.000860488	5.52807	3.82e-08
GATAD2A	age	0.00194288	0.000325542	5.96815	3e-09
GBP2	age	0.00418791	0.000586737	7.13762	1.48e-12
GCDH	age	-0.00246315	0.000437883	-5.62514	2.21e-08
GDI1	age	0.00283213	0.000501906	5.64275	2e-08
GFOD1	age	0.00301838	0.000534294	5.64929	1.93e-08
GNB2	age	0.00253197	0.00049064	5.16054	2.79e-07
GNG7	age	-0.00495542	0.000680199	-7.28525	5.19e-13
GPER	age	0.00818136	0.00112811	7.25228	6.57e-13
GPR137B	age	0.00357065	0.000628599	5.68034	1.61e-08
GPR97	age	0.0143194	0.00278171	5.14769	2.99e-07
GRAP	age	-0.00253406	0.000463259	-5.47008	5.27e-08
GSTA4	age	0.0144756	0.0027792	5.20856	2.17e-07
GTPBP6	age	-0.00236621	0.000377717	-6.26452	4.89e-10
H19	age	0.0193497	0.00356309	5.43059	6.55e-08
HBD	age	0.0168664	0.00269466	6.25919	5.05e-10
HBQ1	age	0.0084354	0.00160687	5.24958	1.75e-07
HCCA2	age	0.00253169	0.000472133	5.36224	9.52e-08
HCFC1R1	age	0.00263481	0.000412502	6.38739	2.25e-10
HEATR1	age	-0.00391203	0.000705016	-5.54886	3.4e-08
HNRPDL	age	-0.00172445	0.000330348	-5.22011	2.04e-07
HOXA9	age	-0.00849949	0.00136985	-6.2047	7.09e-10
HSP90B1	age	-0.00292659	0.00044215	-6.61899	5.04e-11
HSPA5	age	-0.00228834	0.0004293	-5.3304	1.13e-07
HSPA6	age	0.00397736	0.000741383	5.36479	9.39e-08
HSPC159	age	0.0119212	0.00192566	6.19074	7.73e-10
HSPD1	age	-0.00216633	0.000346335	-6.25501	5.18e-10
HTR3A	age	-0.0103191	0.00172815	-5.9712	2.94e-09
IARS	age	-0.0048206	0.000902456	-5.34165	1.06e-07
ID2	age	0.00320691	0.000508446	6.30727	3.74e-10
IDS	age	0.00215441	0.000306243	7.03495	3.03e-12
IFT57	age	0.00381622	0.000711438	5.3641	9.42e-08
IGF2BP3	age	0.00649678	0.00103708	6.26448	4.89e-10
IGJ	age	-0.0172177	0.00241013	-7.14388	1.42e-12
IGLL1	age	-0.0139472	0.00184113	-7.57537	6.26e-14
IGLL3	age	-0.00902275	0.00167643	-5.38214	8.54e-08
IL1B	age	-0.00597176	0.000908791	-6.5711	6.89e-11
IL21R	age	0.00693692	0.000880025	7.88264	6.15e-15
IL28RA	age	-0.0132428	0.00132097	-10.0251	6.21e-23
IL7R	age	-0.0218575	0.00382749	-5.71067	1.36e-08
ILK	age	0.00267849	0.000461058	5.80945	7.65e-09
INPP5A	age	0.00257557	0.000494544	5.20797	2.18e-07
INSIG1	age	0.00382189	0.000732695	5.21621	2.08e-07
IRF2BP2	age	-0.0024711	0.000381865	-6.47113	1.32e-10
IRF8	age	-0.00315262	0.000442505	-7.12448	1.62e-12
ISL2	age	0.00677679	0.00120221	5.63694	2.07e-08
ITGA2B	age	0.00952867	0.00177962	5.35433	9.94e-08
ITLN1	age	0.00852863	0.000948989	8.98707	7.51e-19
ITM2C	age	-0.0106688	0.000974523	-10.9477	7.01e-27
JUND	age	0.00204167	0.000391961	5.20886	2.17e-07
KATNB1	age	0.00229246	0.000392712	5.83751	6.49e-09
KCNA5	age	-0.0133722	0.00231669	-5.77213	9.51e-09
KCNH3	age	0.00502271	0.000777969	6.45618	1.45e-10
KCTD13	age	0.00325676	0.000548735	5.93504	3.65e-09
KIF21B	age	0.00511696	0.000655191	7.80987	1.07e-14
KLF11	age	0.00281983	0.000420684	6.70296	2.89e-11
KLF2	age	0.00315556	0.000453951	6.95133	5.4e-12
KLF9	age	0.00497325	0.000657986	7.55829	7.11e-14
KLHL14	age	-0.023543	0.00448563	-5.24854	1.75e-07
LAMA5	age	-0.0103138	0.00139298	-7.40411	2.2e-13
LBA1	age	0.0033145	0.000646105	5.12998	3.28e-07
LEPREL1	age	-0.00628324	0.000957943	-6.55909	7.45e-11
LGMN	age	-0.00466379	0.000739919	-6.30311	3.84e-10
LIME1	age	-0.00374326	0.000732125	-5.11288	3.59e-07
LIN54	age	0.00231223	0.000432627	5.34463	1.05e-07
LPL	age	0.0125313	0.00223393	5.60953	2.42e-08
LRRC26	age	-0.0093428	0.00122211	-7.6448	3.73e-14
LRRC29	age	0.00305749	0.000591177	5.17186	2.63e-07
LTA	age	0.00447597	0.000832429	5.377	8.78e-08
LTB	age	-0.00321251	0.000590624	-5.43919	6.25e-08
LY6G6D	age	0.0225686	0.00388657	5.80681	7.77e-09
LY9	age	-0.0106155	0.00186707	-5.6856	1.57e-08
LYPD2	age	0.0146408	0.00166142	8.81226	3.35e-18
MAGED1	age	-0.00257092	0.000438152	-5.86764	5.44e-09
MAP4K1	age	-0.00317949	0.000569372	-5.5842	2.79e-08
MAPK7	age	0.00381915	0.000503815	7.58046	6.03e-14
MAPRE2	age	0.00239679	0.000462198	5.18564	2.45e-07
MAPRE3	age	0.00334544	0.000551022	6.07134	1.61e-09
MBOAT5	age	0.00298371	0.000442311	6.74572	2.17e-11
MCOLN1	age	0.00367854	0.000590784	6.22653	6.19e-10
MED16	age	0.00202599	0.00039377	5.14511	3.03e-07
MEG3	age	0.01682	0.00268799	6.25747	5.11e-10
METRNL	age	0.00295537	0.000373696	7.90848	5.04e-15
MIDN	age	0.00217767	0.000382808	5.68867	1.54e-08
MMP11	age	-0.0254212	0.00452468	-5.61835	2.3e-08
MMRN1	age	0.00890268	0.00174608	5.09866	3.86e-07
MPZL2	age	-0.00349766	0.000662296	-5.28112	1.47e-07
MRPL32	age	-0.00182896	0.000346114	-5.28426	1.45e-07
MRPL45	age	-0.00270589	0.000432591	-6.25509	5.18e-10
MS4A4A	age	0.00559145	0.000988223	5.65809	1.83e-08
MST1	age	0.00357482	0.000543939	6.5721	6.84e-11
MT1A	age	0.00513122	0.000730381	7.0254	3.24e-12
MT1E	age	0.00788073	0.00121152	6.50482	1.06e-10
MT1F	age	0.00380789	0.000584432	6.51553	9.89e-11
MT1G	age	0.010052	0.0015231	6.59973	5.71e-11
MT2A	age	0.00586963	0.000810094	7.24562	6.89e-13
MTE	age	0.00520909	0.000847822	6.14408	1.03e-09
MTP18	age	-0.00291582	0.00041335	-7.05411	2.65e-12
MTSS1	age	0.00453772	0.000665224	6.82134	1.31e-11
MXD1	age	0.00429233	0.000661952	6.48435	1.21e-10
MYB	age	-0.0035751	0.000664429	-5.3807	8.61e-08
MYC	age	-0.00212206	0.000391178	-5.4248	6.76e-08
MYL9	age	0.0098662	0.00180737	5.45887	5.61e-08
NBEAL2	age	0.00289246	0.000471327	6.13683	1.08e-09
NCBP2	age	-0.00247064	0.000440974	-5.60269	2.51e-08
NDUFAF2	age	-0.00212483	0.000365638	-5.81131	7.57e-09
NEFH	age	-0.00967567	0.00130004	-7.44262	1.66e-13
NETO2	age	-0.00352378	0.000678602	-5.19271	2.36e-07
NFKBIZ	age	0.00494952	0.000524349	9.43938	1.39e-20
NIBP	age	0.00365973	0.000689033	5.3114	1.25e-07
NLRP7	age	-0.00880962	0.00129487	-6.80346	1.48e-11
NME1	age	-0.00384689	0.000753141	-5.10779	3.68e-07
NOL5A	age	-0.00221514	0.000399779	-5.5409	3.55e-08
NUP62	age	-0.00184581	0.000312764	-5.9016	4.45e-09
OGDH	age	0.00317289	0.000517661	6.12929	1.13e-09
OPN3	age	-0.00452408	0.000627926	-7.2048	9.21e-13
P2RY14	age	-0.0213747	0.0040773	-5.24237	1.81e-07
P2RY2	age	-0.00508631	0.000599071	-8.49034	4.92e-17
P2RY6	age	-0.00426544	0.000707689	-6.02728	2.1e-09
PACAP	age	-0.0109117	0.00120591	-9.04855	4.41e-19
PACS1	age	0.00365361	0.000665203	5.49247	4.66e-08
PACSIN1	age	-0.00879145	0.00102412	-8.58439	2.26e-17
PAQR4	age	0.00279543	0.000433386	6.4502	1.51e-10
PARP3	age	0.00513236	0.00053598	9.57566	4.05e-21
PCCA	age	-0.00280959	0.000407185	-6.90003	7.67e-12
PDGFRB	age	0.0106301	0.00128398	8.27904	2.73e-16
PDIA5	age	-0.00315457	0.000602204	-5.23838	1.85e-07
PDK4	age	0.00421044	0.000751392	5.60352	2.5e-08
PDXP	age	-0.00258754	0.000439752	-5.8841	4.94e-09
PDZK1IP1	age	0.0110271	0.00212234	5.19574	2.32e-07
PEA15	age	-0.00197364	0.000375319	-5.25855	1.66e-07
PEAR1	age	0.00883051	0.00169272	5.21677	2.08e-07
PEBP1	age	-0.00401139	0.000765652	-5.23919	1.84e-07
PEPD	age	-0.00204813	0.000326169	-6.27933	4.45e-10
PFAS	age	-0.0035408	0.000494542	-7.15976	1.27e-12
PFKFB3	age	0.00270222	0.000463338	5.83206	6.71e-09
PFKFB4	age	0.0022731	0.000420951	5.39991	7.75e-08
PGM5	age	0.00951326	0.00166013	5.73045	1.21e-08
PHF19	age	0.00402042	0.000488425	8.2314	4e-16
PID1	age	-0.00837452	0.000931558	-8.9898	7.34e-19
PLEKHM1	age	0.0020107	0.000351773	5.71591	1.32e-08
PLXNB3	age	0.0251377	0.00468127	5.36984	9.13e-08
PMP22	age	-0.0062514	0.00104339	-5.99145	2.6e-09
PNKP	age	0.00223723	0.000417299	5.36122	9.57e-08
PNOC	age	-0.00512541	0.000855928	-5.98813	2.66e-09
PNPLA6	age	0.00270712	0.000415848	6.5099	1.03e-10
POMC	age	-0.00807508	0.00148368	-5.44262	6.13e-08
POU2AF1	age	-0.013636	0.00251644	-5.41878	6.99e-08
PPFIBP1	age	-0.00833473	0.00162189	-5.13891	3.13e-07
PPP1R15A	age	0.00269498	0.000449825	5.99117	2.61e-09
PRMT5	age	-0.00233389	0.000363098	-6.42773	1.74e-10
PROM1	age	-0.0219546	0.00342976	-6.4012	2.06e-10
PROS1	age	0.0106239	0.00175693	6.04685	1.86e-09
PRR16	age	0.00322815	0.000538844	5.99088	2.61e-09
PTGER2	age	0.00331524	0.000581595	5.70026	1.44e-08
PTGES	age	0.0265168	0.00505686	5.24374	1.8e-07
PTPRE	age	-0.00162286	0.000305293	-5.31576	1.22e-07
PTPRO	age	0.00389369	0.000701817	5.54801	3.42e-08
PWWP2B	age	0.0023481	0.00045933	5.11202	3.6e-07
RAB6B	age	0.00578531	0.00103888	5.56879	3.04e-08
RAB6IP1	age	0.00185948	0.000360315	5.16072	2.79e-07
RAPH1	age	0.00657274	0.000981653	6.69559	3.04e-11
RARA	age	0.00213363	0.000399805	5.33669	1.09e-07
RASA1	age	0.00196326	0.000345934	5.67525	1.66e-08
RASGRP2	age	0.00334831	0.000541578	6.18251	8.13e-10
RASL10A	age	0.00508654	0.000935966	5.43453	6.41e-08
REC8	age	0.00325571	0.000564016	5.77238	9.5e-09
REPIN1	age	-0.00267477	0.000446676	-5.98817	2.66e-09
RET	age	0.00704857	0.0010528	6.69504	3.05e-11
RFX2	age	0.00582138	0.00114046	5.10444	3.75e-07
RGL4	age	0.00866436	0.000880033	9.8455	3.36e-22
RHBDD2	age	0.00312694	0.000587254	5.32468	1.17e-07
RHOC	age	0.00480707	0.000660325	7.27985	5.39e-13
RIMS3	age	-0.00430308	0.000788219	-5.45924	5.6e-08
RPL13	age	-0.00348738	0.000524516	-6.64877	4.14e-11
RPL13A	age	-0.00320762	0.000558009	-5.74832	1.09e-08
RPL22	age	-0.00223881	0.000424625	-5.27245	1.54e-07
RRAS	age	0.00422423	0.000555847	7.59962	5.23e-14
S100A10	age	0.00241674	0.000372242	6.49239	1.15e-10
SAT1	age	0.00208317	0.000384252	5.42135	6.89e-08
SBNO2	age	0.00306395	0.000586438	5.22467	1.99e-07
SCD	age	-0.00761106	0.000874621	-8.70211	8.48e-18
SDC4	age	0.0231867	0.00433121	5.35341	9.99e-08
SDHD	age	-0.00226699	0.000393722	-5.75784	1.03e-08
SEC11C	age	-0.00374535	0.000623091	-6.01093	2.32e-09
SEC14L5	age	0.00931859	0.00170029	5.4806	4.97e-08
SELS	age	-0.00196367	0.000329163	-5.96566	3.04e-09
SEPN1	age	0.00276722	0.000515486	5.36818	9.22e-08
SERPINF1	age	-0.00846618	0.00106846	-7.92374	4.48e-15
SFTPD	age	0.00571382	0.00102012	5.6011	2.53e-08
SH3BP4	age	-0.00482303	0.000814874	-5.91875	4.02e-09
SIDT1	age	-0.00716843	0.00135243	-5.3004	1.33e-07
SIDT2	age	0.00357767	0.00062089	5.76216	1.01e-08
SLC25A25	age	0.00378099	0.000524801	7.20461	9.22e-13
SLC25A4	age	-0.00699049	0.00133368	-5.24152	1.82e-07
SLC26A8	age	0.00517631	0.000899857	5.75236	1.07e-08
SLC2A3	age	0.00388928	0.000516946	7.52358	9.18e-14
SLC31A2	age	0.00224793	0.000412901	5.44424	6.08e-08
SLC37A1	age	0.00328218	0.000569059	5.76773	9.76e-09
SLC38A1	age	-0.00708482	0.00119502	-5.9286	3.79e-09
SLC5A10	age	0.0140144	0.00231628	6.05036	1.83e-09
SLC6A12	age	0.00361041	0.000626834	5.75975	1.02e-08
SLC9A8	age	0.00322517	0.00058468	5.51612	4.08e-08
SLC9A9	age	0.00258055	0.000460953	5.5983	2.57e-08
SNTB2	age	0.00332622	0.00055618	5.98047	2.78e-09
SOX15	age	0.00682323	0.000779191	8.75682	5.36e-18
SPCS2	age	-0.00259712	0.000449542	-5.77724	9.23e-09
SPIB	age	-0.0114621	0.00140474	-8.1596	7.08e-16
SPINK2	age	-0.0159124	0.0016508	-9.63922	2.27e-21
SPIRE1	age	0.00372748	0.000647339	5.75816	1.03e-08
SPRED1	age	0.00424331	0.000671375	6.32033	3.44e-10
SRBD1	age	0.0031569	0.000591156	5.34022	1.07e-07
SRPK2	age	-0.00360946	0.000686199	-5.26008	1.65e-07
SRPRB	age	-0.00368255	0.000525796	-7.00377	3.76e-12
SSBP4	age	0.00248099	0.000446712	5.55389	3.3e-08
STK40	age	0.00256798	0.000376555	6.81966	1.32e-11
STRN4	age	0.00272128	0.000509663	5.33937	1.08e-07
SURF6	age	-0.00265843	0.000481907	-5.51649	4.07e-08
TADA3L	age	0.00217891	0.000387283	5.62614	2.2e-08
TAGLN	age	0.00641497	0.000906206	7.07893	2.23e-12
TBC1D16	age	0.00399308	0.000661614	6.03536	2e-09
TCF4	age	-0.00631586	0.000776036	-8.13863	8.36e-16
TCF7L2	age	0.00602712	0.00108014	5.57995	2.85e-08
TCN2	age	0.00485871	0.000893213	5.43959	6.24e-08
TFRC	age	-0.00267149	0.000480705	-5.55744	3.24e-08
TIFAB	age	-0.0172068	0.00266215	-6.46352	1.38e-10
TIMP1	age	0.00406862	0.000532738	7.63718	3.95e-14
TLR9	age	-0.00735662	0.00127635	-5.7638	9.98e-09
TMEM127	age	0.00217054	0.000408476	5.31376	1.24e-07
TNFRSF13B	age	-0.0239438	0.00337915	-7.08572	2.13e-12
TNFRSF17	age	-0.0181025	0.00286149	-6.32625	3.32e-10
TNFRSF21	age	-0.00731713	0.00113572	-6.44269	1.58e-10
TNFRSF8	age	0.00297481	0.000534772	5.56276	3.14e-08
TNS1	age	0.00820445	0.0014752	5.56157	3.17e-08
TOP1MT	age	-0.00400927	0.000618937	-6.47767	1.26e-10
TRIAP1	age	-0.00201057	0.000343461	-5.85385	5.9e-09
TRIM8	age	0.00182514	0.000321171	5.68278	1.59e-08
TSC22D3	age	0.00322628	0.000500014	6.45237	1.49e-10
TSPAN13	age	-0.00624869	0.00106461	-5.86944	5.38e-09
TSPAN3	age	-0.00408534	0.000551853	-7.40295	2.22e-13
TSPYL3	age	0.00503312	0.000974687	5.16383	2.75e-07
TTLL3	age	0.00322567	0.000480952	6.70684	2.82e-11
TTYH3	age	0.00244042	0.000379828	6.42507	1.77e-10
TUBA1A	age	0.00245617	0.00039497	6.21862	6.5e-10
TXNDC5	age	-0.00767974	0.00101476	-7.56803	6.61e-14
UCK2	age	-0.00296926	0.000507087	-5.85552	5.84e-09
UGCG	age	-0.00649412	0.000957733	-6.78071	1.72e-11
UPP1	age	0.00232938	0.000387337	6.01382	2.28e-09
USP13	age	-0.00409661	0.000782802	-5.23327	1.9e-07
VAMP5	age	0.00619996	0.000689548	8.99134	7.24e-19
VEGFB	age	-0.00465248	0.000603007	-7.71546	2.2e-14
VEGFC	age	0.027275	0.0051704	5.27521	1.52e-07
VIL2	age	0.0030157	0.000513676	5.87082	5.34e-09
VMO1	age	0.0124748	0.00166299	7.50146	1.08e-13
VPS37B	age	0.00300169	0.00048745	6.15794	9.46e-10
VWF	age	0.00864366	0.00141024	6.12922	1.13e-09
WBP2	age	0.00278336	0.000487869	5.70514	1.4e-08
WDR1	age	0.00170089	0.000316561	5.37303	8.98e-08
WDR12	age	-0.00255455	0.000464922	-5.49457	4.6e-08
WDR13	age	0.00200217	0.000366673	5.46036	5.56e-08
XBP1	age	-0.00231519	0.00043352	-5.34045	1.07e-07
XPNPEP2	age	0.00534826	0.000928469	5.76031	1.02e-08
XPO6	age	0.00183392	0.00035525	5.16235	2.77e-07
YME1L1	age	-0.00393614	0.000764897	-5.14596	3.02e-07
YWHAH	age	0.0024914	0.000465056	5.35721	9.78e-08
ZFAND2B	age	0.00212046	0.000357572	5.93016	3.76e-09
ZFP36L2	age	-0.00391166	0.000758042	-5.16021	2.8e-07
ZMYND15	age	0.00642875	0.00071412	9.00234	6.59e-19
ZNF544	age	-0.00357721	0.000527023	-6.78758	1.64e-11
ZNF562	age	-0.0029891	0.000585077	-5.10891	3.66e-07
ZNF688	age	0.00272158	0.000447962	6.07548	1.57e-09
ZSCAN18	age	-0.00488889	0.000731094	-6.68708	3.21e-11
ZYX	age	0.002336	0.000395888	5.90066	4.48e-09
ABCA1	bmi	-0.0206734	0.00229962	-8.98994	7.33e-19
ABCA3	bmi	0.0232547	0.00421873	5.51225	4.17e-08
ABCC3	bmi	0.0137667	0.00227313	6.05629	1.76e-09
ABCG1	bmi	-0.0110753	0.00163548	-6.77189	1.83e-11
ACTB	bmi	0.00352331	0.00067384	5.2287	1.95e-07
ADRB2	bmi	0.0116884	0.00162304	7.20155	9.42e-13
AGPAT9	bmi	-0.00741625	0.00138793	-5.34338	1.05e-07
AHCY	bmi	-0.00554585	0.00100148	-5.53768	3.62e-08
AHI1	bmi	-0.0265185	0.0034692	-7.64397	3.76e-14
ALAS2	bmi	0.045288	0.00766339	5.90966	4.24e-09
AMT	bmi	-0.00806534	0.00127383	-6.33156	3.21e-10
ANKRD28	bmi	0.0125825	0.00234992	5.35444	9.93e-08
ASIP	bmi	-0.0359374	0.00600546	-5.98411	2.72e-09
ATG2A	bmi	-0.00659959	0.00106578	-6.19227	7.66e-10
ATP2A3	bmi	0.0103418	0.00197654	5.23224	1.91e-07
AVPI1	bmi	-0.0161255	0.00200834	-8.02926	1.98e-15
AZI1	bmi	-0.00607836	0.00109852	-5.53322	3.71e-08
BCL11A	bmi	-0.00862346	0.00124681	-6.91643	6.86e-12
BCL2L12	bmi	-0.0044715	0.000873991	-5.11619	3.52e-07
BIN2	bmi	0.0137033	0.00234424	5.84552	6.2e-09
BPGM	bmi	0.0164276	0.00261694	6.2774	4.51e-10
C5	bmi	-0.00915147	0.00164805	-5.5529	3.32e-08
CA1	bmi	0.0790787	0.0117181	6.74841	2.14e-11
CACNA2D3	bmi	-0.0123635	0.00142249	-8.69142	9.29e-18
CALD1	bmi	0.0227402	0.00438731	5.18319	2.48e-07
CALM1	bmi	0.00595501	0.00115327	5.16357	2.75e-07
CAPN1	bmi	0.00538748	0.000987408	5.45619	5.69e-08
CCDC50	bmi	-0.00924088	0.00137964	-6.69805	2.99e-11
CCL2	bmi	-0.0304204	0.0051817	-5.87074	5.34e-09
CD160	bmi	0.0281053	0.00503165	5.58571	2.76e-08
CD1B	bmi	-0.0166007	0.00288629	-5.75157	1.07e-08
CD1C	bmi	-0.0118842	0.00182287	-6.51949	9.64e-11
CD209	bmi	-0.0244937	0.00245556	-9.97478	1e-22
CD36	bmi	0.0106552	0.00158985	6.70204	2.91e-11
CD6	bmi	0.0296348	0.0057275	5.17412	2.6e-07
CD74	bmi	-0.00657294	0.0011016	-5.96673	3.02e-09
CD79B	bmi	0.0102446	0.00191113	5.3605	9.61e-08
CD9	bmi	0.0202427	0.00350695	5.77217	9.51e-09
CDC14B	bmi	0.0209136	0.00358256	5.83762	6.49e-09
CDH1	bmi	-0.0579579	0.0109408	-5.29739	1.35e-07
CDK4	bmi	-0.00551238	0.00100386	-5.49116	4.69e-08
CEACAM8	bmi	0.0833168	0.0136729	6.09358	1.4e-09
CEBPD	bmi	-0.0070334	0.00108296	-6.49459	1.13e-10
CETP	bmi	0.0146866	0.00200754	7.31574	4.17e-13
CIITA	bmi	-0.00987436	0.00166672	-5.92441	3.89e-09
CLCN3	bmi	0.00938721	0.00149317	6.28679	4.25e-10
CLEC4C	bmi	-0.0177152	0.002731	-6.48672	1.19e-10
COBLL1	bmi	-0.0173211	0.00264686	-6.54403	8.22e-11
COL6A3	bmi	0.0597348	0.00922109	6.47807	1.26e-10
COL9A2	bmi	-0.0143339	0.00217832	-6.58028	6.49e-11
CX3CR1	bmi	0.0126397	0.00122675	10.3034	4.3e-24
CXCR3	bmi	-0.0197591	0.00287649	-6.86917	9.46e-12
CYP46A1	bmi	-0.0450108	0.00783625	-5.74392	1.12e-08
DAAM1	bmi	0.00968295	0.00188647	5.13283	3.23e-07
DEFA1	bmi	0.0692768	0.010606	6.53184	8.9e-11
DEFA3	bmi	0.0648044	0.0117221	5.5284	3.81e-08
DEFA4	bmi	0.0393482	0.00600206	6.55578	7.62e-11
DNASE1L3	bmi	-0.0172431	0.00305055	-5.65247	1.89e-08
DRD4	bmi	-0.0192062	0.0026778	-7.17236	1.16e-12
E2F2	bmi	0.010013	0.0016538	6.05455	1.78e-09
ECHDC3	bmi	-0.00848642	0.00160342	-5.29268	1.39e-07
EEPD1	bmi	-0.00969292	0.00153316	-6.32219	3.4e-10
EHD3	bmi	0.026309	0.00497634	5.28682	1.43e-07
ELA2	bmi	0.0286593	0.0045503	6.29832	3.95e-10
EMR1	bmi	0.0112632	0.00201205	5.59791	2.58e-08
ENDOD1	bmi	0.0174654	0.00322495	5.41571	7.11e-08
ENO2	bmi	0.0245175	0.00423498	5.78929	8.61e-09
EPB49	bmi	0.0178207	0.00341648	5.2161	2.09e-07
EPHB1	bmi	-0.0215156	0.00396681	-5.42391	6.8e-08
EPS8	bmi	0.0164206	0.00290385	5.65475	1.87e-08
ERAF	bmi	0.0487471	0.0062973	7.74094	1.81e-14
ERCC1	bmi	-0.00488309	0.000865127	-5.64437	1.98e-08
F13A1	bmi	0.0151775	0.00254271	5.96902	2.98e-09
FAAH	bmi	-0.0120619	0.00184702	-6.53046	8.98e-11
FAM20A	bmi	0.0597853	0.0103148	5.79604	8.28e-09
FAM20C	bmi	0.00961985	0.00166125	5.79074	8.54e-09
FCGBP	bmi	-0.032826	0.00410625	-7.99416	2.6e-15
FERMT3	bmi	0.00662962	0.00110662	5.99086	2.61e-09
FES	bmi	-0.00685509	0.00110988	-6.1764	8.45e-10
FKSG30	bmi	0.00783731	0.00151171	5.18439	2.47e-07
FOXRED1	bmi	-0.00804034	0.00122568	-6.55993	7.41e-11
FOXRED2	bmi	-0.0110936	0.00213505	-5.19597	2.32e-07
FPR3	bmi	-0.0200014	0.00315423	-6.34115	3.02e-10
FZD2	bmi	-0.00744741	0.00133994	-5.55801	3.23e-08
GCN5L2	bmi	-0.0080544	0.00111196	-7.24344	7e-13
GNG10	bmi	0.00817331	0.00152219	5.36943	9.15e-08
GNG7	bmi	-0.0106643	0.00164732	-6.47372	1.3e-10
GP1BA	bmi	0.0168442	0.00271311	6.20845	6.93e-10
GPX3	bmi	-0.0306828	0.00372574	-8.23533	3.88e-16
GYPB	bmi	0.0866579	0.0140207	6.18071	8.23e-10
GYPE	bmi	0.0357732	0.0066621	5.36965	9.14e-08
HBD	bmi	0.0557673	0.00645731	8.63631	1.47e-17
HBEGF	bmi	-0.0143858	0.00224749	-6.40082	2.07e-10
HCST	bmi	-0.00513863	0.000952094	-5.39719	7.87e-08
HDAC4	bmi	0.0145086	0.00185542	7.81962	9.97e-15
HLA-DMA	bmi	-0.00984	0.00121234	-8.11656	9.96e-16
HLA-DMB	bmi	-0.00919026	0.000922022	-9.96751	1.07e-22
HLA-DPA1	bmi	-0.00723055	0.00132343	-5.46347	5.47e-08
HLA-DPB1	bmi	-0.0120694	0.00216503	-5.57472	2.94e-08
HMG2L1	bmi	0.0215679	0.00310466	6.94695	5.57e-12
HMGA1	bmi	-0.00646034	0.00120459	-5.36312	9.47e-08
HSPB1	bmi	0.010986	0.00167884	6.54382	8.23e-11
HSPBAP1	bmi	-0.00580947	0.000993657	-5.84655	6.16e-09
HTRA1	bmi	0.0197261	0.0035785	5.5124	4.17e-08
IFIT1L	bmi	0.110122	0.0146147	7.535	8.44e-14
IGF2R	bmi	-0.00555327	0.00108243	-5.13037	3.27e-07
IL18BP	bmi	-0.00837731	0.00119881	-6.98801	4.2e-12
IL1R2	bmi	-0.0222204	0.00295839	-7.51097	1.01e-13
IL21R	bmi	0.0127808	0.00213553	5.98484	2.71e-09
IL28RA	bmi	-0.0221816	0.00319251	-6.94802	5.52e-12
IMPDH2	bmi	-0.00703312	0.00135475	-5.19145	2.38e-07
INSIG1	bmi	0.0108073	0.00177733	6.08065	1.52e-09
IRF8	bmi	-0.0078016	0.00106766	-7.30717	4.44e-13
ISG20	bmi	-0.0112438	0.00206309	-5.44995	5.89e-08
ITGA2B	bmi	0.0250636	0.00432164	5.79956	8.11e-09
ITGAL	bmi	0.00745219	0.00122996	6.0589	1.73e-09
ITGB1	bmi	0.00609603	0.00110757	5.50395	4.37e-08
ITGB3	bmi	0.0288442	0.00462231	6.24022	5.69e-10
ITGB5	bmi	0.016838	0.00317282	5.30696	1.28e-07
ITM2C	bmi	-0.0161334	0.00235629	-6.84693	1.1e-11
KBTBD11	bmi	-0.00687883	0.00114416	-6.01213	2.3e-09
KCNMB4	bmi	0.0213378	0.00330995	6.44655	1.54e-10
KRT5	bmi	-0.0661817	0.0119489	-5.53874	3.6e-08
KYNU	bmi	-0.0081569	0.00131068	-6.22344	6.31e-10
LAS1L	bmi	-0.00615942	0.00113788	-5.41307	7.21e-08
LEFTY1	bmi	0.030111	0.00574009	5.24573	1.78e-07
LEPREL1	bmi	-0.0164885	0.00231324	-7.12785	1.58e-12
LGALS3BP	bmi	-0.0244146	0.00370188	-6.5952	5.89e-11
LGMN	bmi	-0.0121044	0.00178971	-6.76336	1.93e-11
LOH11CR2A	bmi	0.00983398	0.00175561	5.60145	2.53e-08
LRRC26	bmi	-0.0216526	0.00294815	-7.34448	3.39e-13
LYPD2	bmi	0.0271211	0.00401888	6.74841	2.14e-11
M6PRBP1	bmi	0.00497199	0.000791565	6.28121	4.4e-10
MAGED1	bmi	-0.00559436	0.00106615	-5.24724	1.77e-07
MALL	bmi	0.0534091	0.0099932	5.34454	1.05e-07
MAP3K6	bmi	0.0145545	0.00156172	9.31955	4.08e-20
MAP4K1	bmi	-0.00968823	0.00137545	-7.04366	2.85e-12
MARCH3	bmi	0.0103192	0.00174984	5.89721	4.57e-09
MCOLN2	bmi	-0.0151035	0.00225974	-6.68371	3.29e-11
MGAT4B	bmi	0.00805091	0.00156163	5.15545	2.87e-07
MGLL	bmi	0.0162978	0.00290985	5.60092	2.54e-08
MMRN1	bmi	0.0265729	0.00423214	6.27884	4.47e-10
MPHOSPH1	bmi	-0.00917178	0.0014268	-6.42822	1.74e-10
MPL	bmi	0.0224367	0.00355622	6.30914	3.69e-10
MRPS26	bmi	-0.00578169	0.000967611	-5.97522	2.87e-09
MS4A4A	bmi	0.0141187	0.00239902	5.8852	4.91e-09
MTSS1	bmi	0.0107958	0.00160943	6.70783	2.8e-11
MYLIP	bmi	-0.00756215	0.00131016	-5.77195	9.52e-09
NDUFAF2	bmi	-0.00537914	0.000887	-6.06442	1.68e-09
NDUFS8	bmi	-0.00541184	0.000892779	-6.06179	1.7e-09
NFIB	bmi	0.031741	0.00617643	5.13905	3.13e-07
NLRP3	bmi	-0.00457651	0.000830515	-5.51045	4.21e-08
NLRP7	bmi	-0.0190659	0.00314117	-6.0697	1.62e-09
NR1H3	bmi	-0.00819972	0.00137734	-5.95331	3.27e-09
NRG1	bmi	0.0230998	0.00436094	5.29698	1.35e-07
NRGN	bmi	0.0124881	0.00242894	5.14139	3.09e-07
OSBPL1A	bmi	-0.0100744	0.00173823	-5.79574	8.29e-09
OSBPL8	bmi	0.0082417	0.00158179	5.21037	2.15e-07
P2RY2	bmi	-0.00849782	0.00145455	-5.84224	6.32e-09
PACAP	bmi	-0.020339	0.00291401	-6.97973	4.44e-12
PACSIN1	bmi	-0.018427	0.00246912	-7.46298	1.43e-13
PAPSS1	bmi	0.00839639	0.00142977	5.87254	5.29e-09
PAQR8	bmi	-0.00871904	0.00122542	-7.11515	1.73e-12
PARVB	bmi	0.014324	0.00258389	5.5436	3.5e-08
PDE3B	bmi	-0.0105531	0.00197498	-5.34341	1.05e-07
PDE4B	bmi	-0.010948	0.00146228	-7.48689	1.2e-13
PDGFC	bmi	0.0165802	0.00183854	9.01817	5.75e-19
PFAS	bmi	-0.00757968	0.00119844	-6.32461	3.35e-10
PIM3	bmi	0.00890021	0.00148328	6.00036	2.47e-09
PMP22	bmi	-0.0151023	0.00253215	-5.96421	3.07e-09
PNOC	bmi	-0.0114646	0.00208079	-5.50972	4.23e-08
PPFIBP2	bmi	-0.00614926	0.0011498	-5.34812	1.03e-07
PPP1R14B	bmi	-0.00936096	0.00128202	-7.30171	4.61e-13
PROS1	bmi	0.0245764	0.00426719	5.75939	1.02e-08
PTPRO	bmi	0.0097654	0.00170476	5.72832	1.23e-08
RAB1B	bmi	0.00816392	0.00148483	5.49822	4.51e-08
RAB6B	bmi	0.0129983	0.00252884	5.14004	3.11e-07
RAD51AP1	bmi	-0.0116338	0.00226708	-5.13161	3.25e-07
RASA3	bmi	0.00786314	0.00147413	5.33409	1.11e-07
RBM38	bmi	0.0117323	0.00200782	5.84331	6.28e-09
RHOC	bmi	0.012298	0.00158989	7.73514	1.89e-14
RIMS3	bmi	-0.00994269	0.0019184	-5.18281	2.49e-07
RPGRIP1	bmi	-0.0136151	0.00197274	-6.90162	7.59e-12
RPS6KA5	bmi	-0.00799034	0.00146404	-5.45772	5.64e-08
RRAS	bmi	0.00744757	0.00135127	5.51153	4.19e-08
SAMD14	bmi	0.0318695	0.00446779	7.13317	1.53e-12
SC4MOL	bmi	0.00772089	0.00130535	5.91479	4.12e-09
SCAMP5	bmi	-0.0176166	0.00256563	-6.86637	9.65e-12
SDC4	bmi	0.0602644	0.0105208	5.72813	1.23e-08
SDF2L1	bmi	-0.00746776	0.00142012	-5.25855	1.66e-07
SDSL	bmi	-0.00943535	0.00153609	-6.14245	1.04e-09
SELP	bmi	0.0234514	0.0038526	6.08716	1.46e-09
SERPINF1	bmi	-0.0178105	0.00258285	-6.89568	7.9e-12
SH3BP4	bmi	-0.0103753	0.00198293	-5.23229	1.91e-07
SIGLECP16	bmi	-0.0114563	0.00164253	-6.9748	4.6e-12
SLC25A28	bmi	-0.00532775	0.000775168	-6.87303	9.22e-12
SLC2A9	bmi	-0.00943661	0.00116847	-8.07606	1.37e-15
SNCA	bmi	0.0126581	0.00237736	5.32445	1.17e-07
SNORD13	bmi	-0.0160709	0.00260407	-6.17146	8.71e-10
SNTB1	bmi	0.00979388	0.00128099	7.64557	3.71e-14
SORBS3	bmi	-0.0116738	0.00192804	-6.05475	1.78e-09
SQLE	bmi	0.0146042	0.00228506	6.39119	2.2e-10
SREBF1	bmi	-0.00939371	0.00133127	-7.05619	2.62e-12
STAT1	bmi	-0.01179	0.00182315	-6.4668	1.35e-10
STOM	bmi	0.00992103	0.00174926	5.67156	1.7e-08
TARBP1	bmi	-0.0109078	0.00193774	-5.62913	2.16e-08
TCF4	bmi	-0.00977168	0.0018888	-5.17347	2.61e-07
TLN1	bmi	0.00751411	0.00127611	5.88829	4.82e-09
TLR9	bmi	-0.0217352	0.00308324	-7.04947	2.74e-12
TMEM205	bmi	-0.00564566	0.000968694	-5.82811	6.86e-09
TMEM97	bmi	-0.00456605	0.000811268	-5.62829	2.17e-08
TNF	bmi	0.00942604	0.00171249	5.50429	4.36e-08
TNFRSF21	bmi	-0.0187021	0.00274652	-6.80937	1.42e-11
TOP1MT	bmi	-0.0109688	0.00149307	-7.34643	3.34e-13
TPM2	bmi	-0.0125256	0.00218115	-5.74263	1.13e-08
TPST2	bmi	0.0101713	0.00135573	7.50247	1.07e-13
TRIP6	bmi	-0.00982445	0.00157054	-6.25545	5.17e-10
TRPT1	bmi	-0.00495788	0.00087771	-5.64865	1.93e-08
TUBA3D	bmi	0.0141484	0.00275135	5.14234	3.07e-07
TUBB2A	bmi	0.0178294	0.00342012	5.21309	2.12e-07
U2AF1L2	bmi	-0.00530568	0.00100542	-5.27706	1.51e-07
UBE2J1	bmi	0.00918504	0.00142165	6.46082	1.41e-10
VARS	bmi	-0.00540158	0.000979439	-5.51497	4.11e-08
VEGFB	bmi	-0.0121323	0.00144699	-8.3845	1.17e-16
VSIG4	bmi	-0.0237893	0.00339517	-7.00681	3.68e-12
VTI1B	bmi	0.00887359	0.00171766	5.1661	2.71e-07
VWF	bmi	0.0186278	0.00342929	5.43198	6.5e-08
WRB	bmi	0.0107957	0.00203352	5.30887	1.27e-07
ZNF503	bmi	-0.00903836	0.00161833	-5.58498	2.78e-08
ZNF618	bmi	-0.00647615	0.00104342	-6.20665	7.01e-10
ACTR5	sqrt_crp	-0.0277702	0.00502205	-5.52967	3.79e-08
ADARB1	sqrt_crp	0.0772635	0.00842441	9.17139	1.51e-19
ADM	sqrt_crp	0.129181	0.00998079	12.943	2.21e-36
AEBP1	sqrt_crp	-0.182524	0.0318933	-5.72296	1.26e-08
AFF3	sqrt_crp	-0.11855	0.013253	-8.94509	1.08e-18
AFG3L2	sqrt_crp	-0.0333646	0.00618183	-5.39721	7.87e-08
AHCY	sqrt_crp	-0.0297605	0.00573834	-5.18625	2.44e-07
AHI1	sqrt_crp	-0.173356	0.0197439	-8.78025	4.4e-18
AKR1B1	sqrt_crp	-0.0641612	0.00831365	-7.71758	2.16e-14
ALDH1A1	sqrt_crp	-0.0725129	0.0120325	-6.02644	2.11e-09
ALDH7A1	sqrt_crp	-0.0954195	0.015286	-6.24228	5.62e-10
ALKBH2	sqrt_crp	-0.0533236	0.00956877	-5.57267	2.97e-08
ALOX15B	sqrt_crp	-0.148586	0.0240087	-6.18885	7.83e-10
ALPK1	sqrt_crp	0.0644593	0.0111462	5.78307	8.93e-09
APBB1IP	sqrt_crp	0.0303948	0.00435255	6.98322	4.34e-12
APCDD1	sqrt_crp	0.0881375	0.0151893	5.8026	7.97e-09
AQP9	sqrt_crp	0.0861875	0.0104377	8.25734	3.26e-16
ARID5B	sqrt_crp	0.0831835	0.0127761	6.51087	1.02e-10
ARIH2	sqrt_crp	-0.036904	0.00611762	-6.03241	2.04e-09
ARRDC5	sqrt_crp	-0.0361435	0.00660427	-5.47274	5.19e-08
ASGR2	sqrt_crp	0.0663231	0.0109291	6.06847	1.64e-09
ASIP	sqrt_crp	-0.242038	0.0342258	-7.0718	2.35e-12
AUTS2	sqrt_crp	-0.106826	0.0174748	-6.11316	1.25e-09
AVPI1	sqrt_crp	-0.0726555	0.0115901	-6.26878	4.76e-10
AZI1	sqrt_crp	-0.0402154	0.00624155	-6.44318	1.58e-10
B4GALT5	sqrt_crp	0.0374919	0.00545447	6.87361	9.19e-12
B4GALT7	sqrt_crp	-0.0305378	0.00556033	-5.49208	4.67e-08
BATF	sqrt_crp	0.0357613	0.00678991	5.26683	1.59e-07
BCL11A	sqrt_crp	-0.0590739	0.00708888	-8.33331	1.77e-16
BCL2L12	sqrt_crp	-0.0320114	0.00497862	-6.42978	1.72e-10
BLVRA	sqrt_crp	0.0394754	0.00772278	5.11155	3.61e-07
BMS1	sqrt_crp	-0.0363911	0.00529463	-6.87321	9.21e-12
BOP1	sqrt_crp	-0.0272217	0.00517674	-5.25845	1.66e-07
BTAF1	sqrt_crp	-0.0331895	0.00650404	-5.1029	3.78e-07
BZW2	sqrt_crp	-0.0304615	0.00494979	-6.15408	9.7e-10
C1QB	sqrt_crp	0.146933	0.0227684	6.45336	1.48e-10
C1RL	sqrt_crp	0.0566717	0.00705453	8.03338	1.92e-15
CACNA2D3	sqrt_crp	-0.0840893	0.00805552	-10.4387	1.15e-24
CAPZB	sqrt_crp	0.0190563	0.00349291	5.45572	5.71e-08
CCDC14	sqrt_crp	-0.0456418	0.00732725	-6.22905	6.1e-10
CCDC86	sqrt_crp	-0.0402894	0.00773616	-5.20793	2.18e-07
CCNB1IP1	sqrt_crp	-0.0521449	0.00782846	-6.66094	3.82e-11
CCND1	sqrt_crp	-0.102218	0.0162871	-6.27603	4.55e-10
CD1A	sqrt_crp	-0.067379	0.0107576	-6.26336	4.92e-10
CD1B	sqrt_crp	-0.141873	0.0162881	-8.71021	7.94e-18
CD1C	sqrt_crp	-0.108459	0.0101982	-10.6351	1.65e-25
CD1E	sqrt_crp	-0.139245	0.014278	-9.75239	8.02e-22
CD2	sqrt_crp	-0.0879958	0.0162129	-5.42751	6.67e-08
CD209	sqrt_crp	-0.110562	0.0142296	-7.76984	1.46e-14
CD300LF	sqrt_crp	-0.0419515	0.00614596	-6.82587	1.27e-11
CD82	sqrt_crp	0.0612166	0.00892341	6.86023	1.01e-11
CDK10	sqrt_crp	-0.0357454	0.0067427	-5.30135	1.32e-07
CDK4	sqrt_crp	-0.0412563	0.00570505	-7.23154	7.62e-13
CEACAM8	sqrt_crp	0.441848	0.0784024	5.63564	2.08e-08
CETP	sqrt_crp	0.0976834	0.0114104	8.56094	2.75e-17
CHKA	sqrt_crp	-0.0528779	0.00624993	-8.46055	6.29e-17
CHTF18	sqrt_crp	-0.0859447	0.0154987	-5.54529	3.47e-08
CIITA	sqrt_crp	-0.0512776	0.00955751	-5.36517	9.37e-08
CLEC4C	sqrt_crp	-0.116053	0.0155612	-7.45781	1.49e-13
CLEC5A	sqrt_crp	-0.0801503	0.0156001	-5.1378	3.15e-07
CLIC3	sqrt_crp	-0.111843	0.0164697	-6.79084	1.61e-11
CLIP3	sqrt_crp	-0.0948044	0.0172161	-5.50674	4.3e-08
CLYBL	sqrt_crp	-0.0533898	0.00958026	-5.57289	2.97e-08
CNFN	sqrt_crp	-0.0630022	0.0105829	-5.9532	3.28e-09
COL9A2	sqrt_crp	-0.163064	0.0119115	-13.6896	2.93e-40
COQ10A	sqrt_crp	-0.0816506	0.00980438	-8.32798	1.85e-16
COQ6	sqrt_crp	-0.0297439	0.00538244	-5.52609	3.86e-08
CPSF4	sqrt_crp	-0.0219395	0.0042875	-5.1171	3.51e-07
CPT1A	sqrt_crp	0.0415628	0.00756148	5.49664	4.55e-08
CR1	sqrt_crp	0.121427	0.0120303	10.0934	3.25e-23
CREB5	sqrt_crp	0.0608563	0.00840165	7.24338	7e-13
CSNK1E	sqrt_crp	-0.0548925	0.00620735	-8.84314	2.58e-18
CTGLF3	sqrt_crp	-0.043128	0.00539475	-7.99445	2.59e-15
CTSD	sqrt_crp	0.0453878	0.00681696	6.65806	3.9e-11
CUX2	sqrt_crp	-0.231219	0.0312936	-7.38869	2.46e-13
CX3CR1	sqrt_crp	0.0462769	0.00716759	6.45641	1.45e-10
CXCR3	sqrt_crp	-0.107869	0.0164813	-6.54495	8.17e-11
CYP46A1	sqrt_crp	-0.33	0.0445424	-7.40866	2.13e-13
D2HGDH	sqrt_crp	-0.0418223	0.00774871	-5.39733	7.86e-08
DAGLA	sqrt_crp	-0.0414611	0.00793051	-5.22805	1.96e-07
DDX55	sqrt_crp	-0.0336396	0.0052952	-6.35285	2.8e-10
DEFA1	sqrt_crp	0.376662	0.0608127	6.1938	7.59e-10
DEFA3	sqrt_crp	0.396875	0.0670175	5.92196	3.95e-09
DEFA4	sqrt_crp	0.218287	0.0343897	6.34745	2.9e-10
DKC1	sqrt_crp	-0.0314008	0.00544557	-5.7663	9.84e-09
DKFZP761P0423	sqrt_crp	-0.0525716	0.00887533	-5.92333	3.91e-09
DNAJA3	sqrt_crp	-0.0251326	0.00414609	-6.06178	1.7e-09
DNASE1L3	sqrt_crp	-0.149728	0.0172194	-8.69533	9e-18
DRD4	sqrt_crp	-0.125177	0.0152487	-8.20898	4.79e-16
DSC2	sqrt_crp	0.107071	0.0141764	7.55279	7.41e-14
DUSP3	sqrt_crp	0.0377394	0.00644875	5.8522	5.96e-09
DYSF	sqrt_crp	0.074968	0.0130372	5.75031	1.08e-08
E2F2	sqrt_crp	0.0591241	0.00946006	6.24987	5.36e-10
EBI2	sqrt_crp	-0.070093	0.0122122	-5.73961	1.15e-08
EEF1B2	sqrt_crp	-0.0315642	0.00433429	-7.28244	5.3e-13
EEF2K	sqrt_crp	-0.0316418	0.00570315	-5.54813	3.41e-08
EIF3B	sqrt_crp	-0.0262467	0.00447883	-5.86017	5.69e-09
EIF4A2	sqrt_crp	-0.0323375	0.00549205	-5.88806	4.82e-09
ENO3	sqrt_crp	-0.0565676	0.00877164	-6.44891	1.52e-10
EP400	sqrt_crp	-0.0310317	0.00598789	-5.18241	2.49e-07
EPHB1	sqrt_crp	-0.155622	0.0225641	-6.89688	7.84e-12
EXTL2	sqrt_crp	-0.156189	0.0197634	-7.90293	5.27e-15
FAAH	sqrt_crp	-0.0774818	0.0105324	-7.35652	3.11e-13
FAM129A	sqrt_crp	0.0963814	0.0128911	7.47657	1.3e-13
FAM129C	sqrt_crp	-0.106584	0.014558	-7.3213	4.01e-13
FAM14A	sqrt_crp	0.048462	0.0093816	5.16565	2.72e-07
FAM20A	sqrt_crp	0.546869	0.0579805	9.43194	1.49e-20
FAM44B	sqrt_crp	-0.0351392	0.00431951	-8.135	8.62e-16
FANCD2	sqrt_crp	-0.0547517	0.008734	-6.2688	4.76e-10
FBL	sqrt_crp	-0.03207	0.00502634	-6.38039	2.35e-10
FBLN2	sqrt_crp	-0.185891	0.0344881	-5.39	8.19e-08
FBXL10	sqrt_crp	-0.0365696	0.00507251	-7.20937	8.92e-13
FCER1A	sqrt_crp	-0.130953	0.0157196	-8.33058	1.81e-16
FCGBP	sqrt_crp	-0.329019	0.0224418	-14.661	1.49e-45
FCGR1A	sqrt_crp	0.118217	0.0115301	10.2529	7.03e-24
FCGR1B	sqrt_crp	0.120358	0.0119611	10.0624	4.37e-23
FIT1	sqrt_crp	-0.0532813	0.00936487	-5.68948	1.53e-08
FLVCR2	sqrt_crp	0.0502415	0.00609306	8.2457	3.57e-16
FOXRED1	sqrt_crp	-0.0441122	0.00702361	-6.28057	4.42e-10
FPR1	sqrt_crp	0.0568837	0.00985286	5.77332	9.45e-09
FPR2	sqrt_crp	0.0744043	0.0131834	5.64378	1.99e-08
GARNL1	sqrt_crp	-0.029776	0.00572503	-5.20101	2.26e-07
GATS	sqrt_crp	-0.0518159	0.00944719	-5.4848	4.86e-08
GCLM	sqrt_crp	0.0498842	0.00806585	6.18462	8.03e-10
GCN5L2	sqrt_crp	-0.0656748	0.00624919	-10.5093	5.75e-25
GCNT1	sqrt_crp	0.0459893	0.00770661	5.96751	3.01e-09
GEMIN4	sqrt_crp	-0.0390124	0.00501926	-7.77254	1.43e-14
GHRL	sqrt_crp	-0.0928166	0.0115093	-8.06447	1.5e-15
GK	sqrt_crp	0.0592523	0.00921669	6.42881	1.73e-10
GLTSCR2	sqrt_crp	-0.0263044	0.00453314	-5.80268	7.97e-09
GNG10	sqrt_crp	0.0726422	0.00859395	8.45271	6.7e-17
GNG7	sqrt_crp	-0.0760313	0.00935848	-8.12432	9.38e-16
GPM6B	sqrt_crp	-0.294828	0.0548173	-5.37838	8.72e-08
GPR114	sqrt_crp	-0.0877765	0.0119378	-7.35285	3.19e-13
GPSM1	sqrt_crp	-0.0606049	0.00924073	-6.55846	7.49e-11
GPX3	sqrt_crp	-0.128287	0.0215529	-5.9522	3.3e-09
GSR	sqrt_crp	0.0395023	0.00675211	5.85037	6.02e-09
GTPBP3	sqrt_crp	-0.0347152	0.00513122	-6.76549	1.91e-11
GZMB	sqrt_crp	-0.101257	0.0146248	-6.92368	6.53e-12
HDAC4	sqrt_crp	0.0593537	0.0107245	5.53439	3.69e-08
HLA-DMA	sqrt_crp	-0.0420687	0.00700635	-6.00436	2.41e-09
HLA-DMB	sqrt_crp	-0.0383236	0.00536096	-7.14865	1.37e-12
HLA-DOA	sqrt_crp	-0.0872729	0.0159435	-5.47389	5.16e-08
HLA-DPA1	sqrt_crp	-0.0418481	0.00757457	-5.52482	3.89e-08
HLA-DPB1	sqrt_crp	-0.0709451	0.0123826	-5.7294	1.22e-08
HMGN1	sqrt_crp	-0.0386534	0.00680512	-5.68005	1.62e-08
HNRPDL	sqrt_crp	-0.0241876	0.0046017	-5.25624	1.68e-07
HSPD1	sqrt_crp	-0.0374677	0.00477145	-7.85247	7.76e-15
IL11RA	sqrt_crp	-0.0560818	0.00803781	-6.97724	4.52e-12
IL18BP	sqrt_crp	-0.0487019	0.006859	-7.10043	1.92e-12
IL18R1	sqrt_crp	-0.126297	0.0149216	-8.46405	6.11e-17
IL1R2	sqrt_crp	-0.101157	0.0170518	-5.93231	3.71e-09
IL1RN	sqrt_crp	0.0452672	0.00751823	6.02099	2.18e-09
IL28RA	sqrt_crp	-0.116335	0.0183217	-6.34956	2.86e-10
IL4R	sqrt_crp	0.0394869	0.00603921	6.53842	8.53e-11
IMP3	sqrt_crp	-0.022117	0.00430322	-5.13963	3.12e-07
IMPDH2	sqrt_crp	-0.0565917	0.00768657	-7.3624	2.98e-13
IRF8	sqrt_crp	-0.0492751	0.00608637	-8.09597	1.17e-15
KCNA5	sqrt_crp	-0.201755	0.0321053	-6.28416	4.32e-10
KCNJ15	sqrt_crp	0.120941	0.0215562	5.61052	2.4e-08
KCNMB4	sqrt_crp	0.112217	0.0189916	5.90874	4.27e-09
KCTD5	sqrt_crp	-0.0386844	0.00528571	-7.31869	4.09e-13
LAS1L	sqrt_crp	-0.0405659	0.00648912	-6.25138	5.31e-10
LEPREL1	sqrt_crp	-0.119482	0.0130973	-9.12258	2.32e-19
LGMN	sqrt_crp	-0.0690165	0.0102469	-6.73537	2.33e-11
LILRB4	sqrt_crp	0.0523478	0.00721138	7.25905	6.26e-13
LIMK2	sqrt_crp	0.0745583	0.0104647	7.12471	1.62e-12
LMNB1	sqrt_crp	0.0699124	0.0107695	6.49169	1.15e-10
LOH11CR2A	sqrt_crp	0.0658899	0.00999416	6.59284	5.98e-11
LRRC26	sqrt_crp	-0.150891	0.016729	-9.01971	5.68e-19
LUC7L	sqrt_crp	-0.0369685	0.00531701	-6.95287	5.35e-12
LY9	sqrt_crp	-0.135718	0.0260109	-5.21774	2.07e-07
M6PRBP1	sqrt_crp	0.0358871	0.00449531	7.98322	2.83e-15
MAGED1	sqrt_crp	-0.0434014	0.0060561	-7.16655	1.21e-12
MAP3K6	sqrt_crp	0.0608752	0.00906313	6.7168	2.64e-11
MAP4K1	sqrt_crp	-0.0797572	0.00773219	-10.3149	3.86e-24
MAPK13	sqrt_crp	0.0709917	0.0138958	5.10888	3.66e-07
MAPK3	sqrt_crp	0.0310374	0.00507949	6.11034	1.27e-09
MBOAT5	sqrt_crp	0.0314927	0.00616186	5.11091	3.62e-07
MCOLN2	sqrt_crp	-0.119349	0.0127599	-9.35345	3.02e-20
MEF2D	sqrt_crp	-0.0388741	0.0064771	-6.00178	2.45e-09
METTL7B	sqrt_crp	0.352167	0.0492962	7.14389	1.42e-12
MLSTD1	sqrt_crp	0.05321	0.00791241	6.72488	2.5e-11
MMP25	sqrt_crp	0.0779293	0.015038	5.18215	2.5e-07
MPHOSPH1	sqrt_crp	-0.0485823	0.00817974	-5.93935	3.56e-09
MRPS25	sqrt_crp	-0.0493382	0.00715029	-6.90016	7.67e-12
MRPS6	sqrt_crp	-0.0390218	0.00551528	-7.07522	2.29e-12
MS4A4A	sqrt_crp	0.118782	0.0135475	8.76781	4.89e-18
MT1F	sqrt_crp	0.0567578	0.00808332	7.0216	3.33e-12
MUC1	sqrt_crp	0.138301	0.0262024	5.27819	1.5e-07
MXD1	sqrt_crp	0.0599333	0.00917041	6.53551	8.69e-11
MXD4	sqrt_crp	-0.0428686	0.00598759	-7.15958	1.27e-12
MZF1	sqrt_crp	-0.0313531	0.00613804	-5.10801	3.68e-07
NAT10	sqrt_crp	-0.0303676	0.0058608	-5.18148	2.5e-07
NAT9	sqrt_crp	-0.0400739	0.00531738	-7.53639	8.36e-14
NDUFAF2	sqrt_crp	-0.0321255	0.00507237	-6.33343	3.17e-10
NHS	sqrt_crp	-0.0566851	0.00934614	-6.06507	1.67e-09
NIT2	sqrt_crp	-0.034002	0.00651166	-5.22171	2.02e-07
NKTR	sqrt_crp	-0.0439617	0.00713909	-6.15789	9.47e-10
NOL1	sqrt_crp	-0.033189	0.00504377	-6.5802	6.5e-11
NPL	sqrt_crp	0.0371261	0.00703908	5.27428	1.53e-07
NPM3	sqrt_crp	-0.0598296	0.0117024	-5.11257	3.59e-07
NT5C	sqrt_crp	-0.0290689	0.00519888	-5.59137	2.68e-08
NXT1	sqrt_crp	-0.0278247	0.00510883	-5.44639	6.01e-08
ORAOV1	sqrt_crp	-0.0336423	0.00555274	-6.05868	1.74e-09
OSBPL7	sqrt_crp	-0.0402966	0.00720905	-5.58972	2.7e-08
PACSIN1	sqrt_crp	-0.134941	0.0139624	-9.66462	1.8e-21
PAPLN	sqrt_crp	-0.185817	0.0364185	-5.10227	3.79e-07
PAPSS1	sqrt_crp	0.0439155	0.00820225	5.35408	9.95e-08
PARP2	sqrt_crp	-0.0471075	0.0091135	-5.16898	2.67e-07
PDXK	sqrt_crp	-0.0394254	0.00582019	-6.77391	1.8e-11
PDXP	sqrt_crp	-0.0426939	0.0060801	-7.0219	3.32e-12
PERLD1	sqrt_crp	-0.0376656	0.00621592	-6.05953	1.73e-09
PFAS	sqrt_crp	-0.0672126	0.00672898	-9.98853	8.8e-23
PGAM4	sqrt_crp	0.0295499	0.00567656	5.20559	2.2e-07
PHB	sqrt_crp	-0.0300556	0.0052806	-5.69171	1.51e-08
PILRB	sqrt_crp	-0.0521545	0.0100258	-5.20202	2.25e-07
PIM3	sqrt_crp	0.0690472	0.00840377	8.21622	4.52e-16
PLA2G4B	sqrt_crp	-0.0377696	0.00598815	-6.30739	3.74e-10
PLAC8	sqrt_crp	0.0564727	0.00951142	5.93735	3.6e-09
PLEKHG4	sqrt_crp	-0.0761573	0.0137714	-5.53011	3.78e-08
PNPLA7	sqrt_crp	-0.0648541	0.00996812	-6.50615	1.05e-10
POLE3	sqrt_crp	-0.0225789	0.00412899	-5.46839	5.32e-08
POLR1E	sqrt_crp	-0.038452	0.00573127	-6.70917	2.78e-11
POLR3B	sqrt_crp	-0.0339234	0.00562412	-6.03176	2.04e-09
POLR3H	sqrt_crp	-0.0319286	0.00609187	-5.24119	1.83e-07
PON2	sqrt_crp	-0.0508599	0.00771609	-6.59141	6.04e-11
POP5	sqrt_crp	-0.0472378	0.00693826	-6.80831	1.43e-11
PPOX	sqrt_crp	-0.0323257	0.00537933	-6.00924	2.34e-09
PPP1R14B	sqrt_crp	-0.0541513	0.00733788	-7.37969	2.63e-13
PPRC1	sqrt_crp	-0.0287716	0.00555288	-5.18138	2.51e-07
PRKRIP1	sqrt_crp	-0.0300595	0.00445473	-6.74777	2.15e-11
PRPF8	sqrt_crp	-0.0283895	0.00530222	-5.35426	9.94e-08
PTGDS	sqrt_crp	-0.188265	0.0211273	-8.91095	1.45e-18
PUS1	sqrt_crp	-0.0280862	0.00503606	-5.57703	2.9e-08
PUS7	sqrt_crp	-0.0577439	0.00851423	-6.78205	1.71e-11
QARS	sqrt_crp	-0.0294879	0.00442494	-6.66402	3.74e-11
RAB1B	sqrt_crp	0.0462978	0.00849809	5.44802	5.95e-08
RAB40B	sqrt_crp	-0.0680465	0.00914928	-7.43736	1.73e-13
RAB7B	sqrt_crp	-0.275239	0.0501077	-5.49294	4.64e-08
RASD1	sqrt_crp	-0.0863175	0.0143011	-6.03573	2e-09
RBM33	sqrt_crp	-0.0347552	0.00507076	-6.85405	1.05e-11
RBMS1	sqrt_crp	0.029329	0.0052053	5.63444	2.1e-08
RCC2	sqrt_crp	-0.0225834	0.00395784	-5.706	1.39e-08
REPIN1	sqrt_crp	-0.0386105	0.00619705	-6.23045	6.05e-10
REV1	sqrt_crp	-0.0271963	0.00531693	-5.11504	3.55e-07
RIMS3	sqrt_crp	-0.0768419	0.0108955	-7.05264	2.68e-12
RNF216	sqrt_crp	-0.0282175	0.00536453	-5.26	1.65e-07
ROBO3	sqrt_crp	-0.0975554	0.0155933	-6.25624	5.15e-10
RPL18A	sqrt_crp	-0.0181164	0.00347463	-5.2139	2.11e-07
RPL22	sqrt_crp	-0.034595	0.00590148	-5.86208	5.62e-09
RPL5	sqrt_crp	-0.029715	0.00523998	-5.67083	1.71e-08
RPP40	sqrt_crp	-0.0454132	0.00714788	-6.35338	2.8e-10
RPS5	sqrt_crp	-0.0305265	0.00586544	-5.20447	2.22e-07
RRAGD	sqrt_crp	0.0496206	0.00912892	5.43554	6.38e-08
RYR1	sqrt_crp	-0.0651762	0.0127238	-5.12237	3.41e-07
SCAMP5	sqrt_crp	-0.0998505	0.0146918	-6.79635	1.55e-11
SCARB1	sqrt_crp	-0.0593689	0.0110562	-5.36974	9.14e-08
SCMH1	sqrt_crp	-0.0382746	0.00670692	-5.70673	1.39e-08
SERPINA1	sqrt_crp	0.0448945	0.00635226	7.06749	2.42e-12
SERPINF1	sqrt_crp	-0.119002	0.0147006	-8.09505	1.18e-15
SERPINF2	sqrt_crp	-0.0934128	0.0152293	-6.13378	1.1e-09
SF3A3	sqrt_crp	-0.0341113	0.00510461	-6.68245	3.31e-11
SFRS14	sqrt_crp	-0.0201431	0.00387008	-5.20483	2.21e-07
SH3BP4	sqrt_crp	-0.0974604	0.0111739	-8.72217	7.18e-18
SIDT1	sqrt_crp	-0.104567	0.0188221	-5.55558	3.27e-08
SLC25A5	sqrt_crp	-0.0241443	0.00408483	-5.91073	4.22e-09
SLC26A8	sqrt_crp	0.0831777	0.0124647	6.67305	3.53e-11
SLC2A1	sqrt_crp	-0.0692832	0.0130052	-5.32735	1.15e-07
SLC2A14	sqrt_crp	0.0973534	0.0157093	6.19718	7.43e-10
SLC2A3	sqrt_crp	0.0566886	0.00710094	7.98325	2.83e-15
SLC2A9	sqrt_crp	-0.0386381	0.00675167	-5.72274	1.27e-08
SLC39A8	sqrt_crp	0.144773	0.0265012	5.4629	5.49e-08
SLC47A1	sqrt_crp	-0.151364	0.0276455	-5.47519	5.13e-08
SLC7A1	sqrt_crp	-0.0409052	0.00738495	-5.539	3.59e-08
SLC9A3R1	sqrt_crp	-0.0297195	0.0052722	-5.63703	2.07e-08
SMC2	sqrt_crp	-0.064416	0.0111846	-5.75933	1.02e-08
SNTB1	sqrt_crp	0.0423681	0.00739446	5.7297	1.22e-08
SOCS3	sqrt_crp	0.169122	0.0231664	7.30031	4.66e-13
SORBS3	sqrt_crp	-0.0741801	0.0109953	-6.74652	2.16e-11
SPG7	sqrt_crp	-0.0367942	0.00555669	-6.62161	4.95e-11
SPIB	sqrt_crp	-0.106461	0.0195558	-5.44394	6.09e-08
SPNS3	sqrt_crp	-0.100307	0.0144446	-6.94431	5.67e-12
SRGAP3	sqrt_crp	-0.0795648	0.013116	-6.06623	1.66e-09
STARD13	sqrt_crp	-0.0967109	0.0182774	-5.29128	1.4e-07
STMN1	sqrt_crp	-0.141186	0.0239281	-5.90042	4.48e-09
STOM	sqrt_crp	0.0519666	0.0100277	5.18232	2.49e-07
TAF6L	sqrt_crp	-0.0310833	0.00529736	-5.8677	5.44e-09
TARBP1	sqrt_crp	-0.0652648	0.0110704	-5.89542	4.62e-09
TCEAL4	sqrt_crp	-0.0406936	0.00511994	-7.94806	3.72e-15
TCN2	sqrt_crp	0.0694905	0.0124282	5.59135	2.68e-08
TLR9	sqrt_crp	-0.124175	0.0176491	-7.03573	3.02e-12
TMEM138	sqrt_crp	-0.0279007	0.00493017	-5.65918	1.82e-08
TMEM14C	sqrt_crp	-0.0427949	0.00534291	-8.00966	2.3e-15
TMEM150	sqrt_crp	-0.04145	0.00560988	-7.38875	2.46e-13
TMEM42	sqrt_crp	-0.024094	0.00466819	-5.16131	2.78e-07
TNFAIP6	sqrt_crp	0.120772	0.0161126	7.49547	1.13e-13
TNFRSF21	sqrt_crp	-0.139479	0.0155387	-8.97621	8.27e-19
TOMM40	sqrt_crp	-0.0334748	0.00555768	-6.02316	2.15e-09
TOP1MT	sqrt_crp	-0.088178	0.00839379	-10.5051	5.99e-25
TOP3B	sqrt_crp	-0.0385705	0.00750764	-5.1375	3.15e-07
TPM2	sqrt_crp	-0.0798652	0.0124542	-6.41271	1.92e-10
TRAPPC6A	sqrt_crp	-0.059113	0.00745426	-7.9301	4.27e-15
TRMT1	sqrt_crp	-0.0321997	0.00484049	-6.65216	4.05e-11
TSPAN32	sqrt_crp	-0.0333812	0.00570412	-5.85212	5.96e-09
TTC3	sqrt_crp	-0.0377266	0.0059392	-6.35213	2.82e-10
TYSND1	sqrt_crp	-0.0322992	0.00471991	-6.84317	1.13e-11
UBE2G2	sqrt_crp	-0.0354747	0.00603367	-5.87946	5.08e-09
UBE2J1	sqrt_crp	0.0472593	0.00816005	5.79155	8.5e-09
USP24	sqrt_crp	-0.0292477	0.00559829	-5.22439	2e-07
UXT	sqrt_crp	-0.0272781	0.0045869	-5.94696	3.4e-09
VARS	sqrt_crp	-0.0296114	0.0056127	-5.27579	1.52e-07
VEGFB	sqrt_crp	-0.0737958	0.00825596	-8.93849	1.14e-18
VENTX	sqrt_crp	-0.0667799	0.00945836	-7.0604	2.54e-12
VIPR1	sqrt_crp	-0.0452053	0.00802557	-5.63267	2.12e-08
WDR18	sqrt_crp	-0.0300261	0.0055326	-5.42712	6.68e-08
WDR75	sqrt_crp	-0.0400836	0.00578042	-6.93437	6.07e-12
WRN	sqrt_crp	-0.0388297	0.00647304	-5.99868	2.5e-09
WWC3	sqrt_crp	0.0532307	0.00803808	6.62232	4.93e-11
ZDHHC8	sqrt_crp	-0.0316004	0.00569368	-5.55008	3.38e-08
ZNF248	sqrt_crp	-0.0738652	0.0124945	-5.91182	4.19e-09
ZNF337	sqrt_crp	-0.054221	0.00817996	-6.62851	4.73e-11
ZNF529	sqrt_crp	-0.0381404	0.00627029	-6.08272	1.5e-09
ZNF548	sqrt_crp	-0.0470966	0.0084621	-5.5656	3.1e-08
ZNF618	sqrt_crp	-0.0309723	0.00599435	-5.16692	2.7e-07
ZNF74	sqrt_crp	-0.0362109	0.00706557	-5.12498	3.37e-07
ZNF789	sqrt_crp	-0.0507649	0.00611532	-8.30128	2.29e-16
ZZZ3	sqrt_crp	-0.0324294	0.0058919	-5.50406	4.37e-08
AGPAT4	sbp	0.00423064	0.000415714	10.1768	1.47e-23
ARHGAP17	sbp	-0.00137242	0.00026232	-5.23187	1.92e-07
ARID5B	sbp	0.00395176	0.000623796	6.33501	3.14e-10
AUTS2	sbp	0.00507403	0.000851871	5.95634	3.22e-09
AVPI1	sbp	0.00321414	0.000551683	5.82607	6.95e-09
CEBPA	sbp	-0.00170466	0.000290643	-5.86515	5.53e-09
CRIP1	sbp	0.0034191	0.000396301	8.62754	1.59e-17
CRIP2	sbp	0.0150644	0.00249524	6.03724	1.98e-09
CX3CR1	sbp	-0.00241629	0.000335155	-7.20948	8.93e-13
CXCL16	sbp	0.00187942	0.000337277	5.57234	2.98e-08
DDIT4	sbp	0.00549923	0.000825616	6.66075	3.83e-11
DHRS9	sbp	-0.00488277	0.000636418	-7.67228	3.05e-14
EBI2	sbp	0.0033097	0.000591084	5.59938	2.56e-08
EDG3	sbp	-0.00237334	0.000426597	-5.56342	3.14e-08
EMP1	sbp	0.00475422	0.000797716	5.95979	3.15e-09
FAM20C	sbp	-0.00319399	0.000456784	-6.99233	4.08e-12
FBXO34	sbp	0.00207491	0.000302225	6.86544	9.72e-12
FOXO1	sbp	0.00243128	0.000379866	6.40036	2.08e-10
GFOD1	sbp	0.00288761	0.000358349	8.05809	1.58e-15
HVCN1	sbp	-0.00187573	0.000243688	-7.69726	2.53e-14
IL1R2	sbp	0.00448255	0.000811116	5.52639	3.86e-08
IL1RAP	sbp	0.00362125	0.000637313	5.68205	1.6e-08
IL1RN	sbp	-0.00208559	0.000367072	-5.68169	1.6e-08
JOSD1	sbp	0.00136336	0.000264097	5.16235	2.77e-07
KCNMB4	sbp	-0.00510756	0.000914871	-5.58282	2.81e-08
KYNU	sbp	0.00230518	0.000361335	6.37962	2.37e-10
LYPLA3	sbp	-0.00220913	0.000405096	-5.45335	5.79e-08
MAP3K7IP1	sbp	-0.00190445	0.00036611	-5.20186	2.25e-07
MYADM	sbp	0.00246539	0.00032602	7.56208	6.93e-14
NR4A2	sbp	0.0077632	0.000883914	8.78276	4.32e-18
P2RX4	sbp	-0.0022432	0.00041173	-5.44823	5.95e-08
PAPSS2	sbp	0.00463763	0.000641731	7.22676	7.9e-13
PDE7B	sbp	0.00468009	0.00068882	6.79436	1.57e-11
PLEKHA1	sbp	0.00171756	0.000324822	5.2877	1.42e-07
PPP1R15A	sbp	0.00169747	0.0003051	5.56364	3.13e-08
RAB11FIP1	sbp	0.00169639	0.000246975	6.86865	9.52e-12
RASL10A	sbp	0.00428785	0.00063055	6.80018	1.51e-11
RFX2	sbp	0.00418884	0.000769661	5.44245	6.14e-08
SGMS2	sbp	0.00349263	0.000625716	5.58181	2.83e-08
SLC27A3	sbp	-0.00175218	0.000264601	-6.62199	4.95e-11
SLC31A2	sbp	0.0016902	0.00027902	6.05762	1.75e-09
TIPARP	sbp	0.00253687	0.000347612	7.29799	4.75e-13
TPPP3	sbp	0.0048341	0.000545798	8.85693	2.3e-18
TSC22D3	sbp	0.00285476	0.000333689	8.55516	2.9e-17
TUBB6	sbp	0.00316463	0.000556174	5.69001	1.53e-08
WDR49	sbp	0.0033455	0.000609638	5.48769	4.78e-08
ZBTB16	sbp	0.00440317	0.000718705	6.12654	1.15e-09
ZMYND11	sbp	0.0018569	0.000349201	5.31755	1.21e-07
Gender	glucose	1.11e-17	1.66e-18	6.6572	3.92e-11
ARRDC4	glucose	0.00406148	0.000760775	5.3386	1.08e-07
DHRS9	glucose	-0.00369683	0.000636088	-5.81182	7.55e-09
FKBP5	glucose	0.00357749	0.000562919	6.35525	2.76e-10
PFKFB3	glucose	0.00163729	0.000309155	5.29603	1.36e-07
TCEA3	glucose	-0.00619612	0.00119768	-5.17344	2.61e-07
ZBTB16	glucose	0.00467453	0.000715084	6.53704	8.6e-11
ABHD12	smoker	0.13347	0.0161159	8.28189	2.67e-16
ACOX2	smoker	0.136238	0.0259815	5.24365	1.8e-07
ADAMDEC1	smoker	0.323986	0.0462886	6.99927	3.88e-12
ADORA2B	smoker	0.10107	0.0174716	5.78481	8.84e-09
ADORA3	smoker	0.116739	0.0166477	7.01232	3.55e-12
AIM2	smoker	-0.21188	0.0316781	-6.68851	3.18e-11
ALDH4A1	smoker	0.109707	0.0196688	5.57774	2.89e-08
ALDOC	smoker	0.0775823	0.0143921	5.39061	8.16e-08
ANG	smoker	0.124939	0.0239605	5.21437	2.1e-07
ANKRD35	smoker	0.25194	0.0459413	5.48396	4.88e-08
ANPEP	smoker	0.194523	0.0377971	5.1465	3.01e-07
ANXA7	smoker	0.0507649	0.00985379	5.15182	2.93e-07
APCDD1	smoker	0.298774	0.0320854	9.31185	4.37e-20
ARHGAP24	smoker	0.0830522	0.0153419	5.41343	7.2e-08
ARHGAP26	smoker	0.166035	0.0321206	5.16911	2.67e-07
ARMCX2	smoker	-0.156285	0.0253555	-6.16378	9.13e-10
ASGR1	smoker	0.100335	0.0126743	7.91637	4.75e-15
ASGR2	smoker	0.249449	0.0228863	10.8995	1.15e-26
ATF3	smoker	-0.330521	0.0416163	-7.94212	3.89e-15
ATP1B3	smoker	-0.0789957	0.0137724	-5.73578	1.17e-08
ATP6V0A1	smoker	0.0638623	0.0116541	5.4798	5e-08
ATP8B4	smoker	0.102443	0.0178835	5.72835	1.23e-08
AXL	smoker	0.460689	0.0848291	5.43079	6.55e-08
BAG3	smoker	0.126916	0.0180103	7.04689	2.79e-12
BATF	smoker	0.0781322	0.0145751	5.36067	9.6e-08
BATF3	smoker	-0.198077	0.0209053	-9.47496	1.01e-20
BCKDK	smoker	0.0475322	0.0092503	5.13845	3.14e-07
C1QC	smoker	0.53048	0.0678617	7.81708	1.02e-14
CA2	smoker	-0.186806	0.0320042	-5.83691	6.52e-09
CABP4	smoker	-0.59001	0.0602251	-9.79675	5.31e-22
CAMK1D	smoker	-0.114056	0.0154142	-7.39938	2.28e-13
CASP5	smoker	-0.150334	0.0269729	-5.57353	2.96e-08
CCDC106	smoker	0.132799	0.0176816	7.51058	1.01e-13
CCDC34	smoker	-0.14539	0.0253209	-5.74188	1.13e-08
CCR7	smoker	0.33117	0.0592206	5.59214	2.67e-08
CD36	smoker	0.104625	0.0196599	5.32177	1.19e-07
CD38	smoker	-0.263245	0.0429914	-6.12321	1.17e-09
CD79B	smoker	-0.180248	0.0232742	-7.74453	1.77e-14
CD83	smoker	-0.233346	0.0273426	-8.53416	3.44e-17
CDC42EP2	smoker	-0.13347	0.0220877	-6.04272	1.91e-09
CDKN1C	smoker	-0.406706	0.0341061	-11.9247	2.27e-31
CEACAM1	smoker	-0.14998	0.0177218	-8.46299	6.16e-17
CEBPA	smoker	0.0660597	0.0128972	5.12201	3.42e-07
CENPE	smoker	-0.197153	0.0386776	-5.09736	3.89e-07
CENTB1	smoker	0.144123	0.0188678	7.63859	3.91e-14
CHST2	smoker	-0.173279	0.0306449	-5.65443	1.87e-08
CHST7	smoker	-0.139378	0.019337	-7.20784	9.02e-13
CKB	smoker	-0.251988	0.0382023	-6.59614	5.85e-11
CKS1B	smoker	-0.150094	0.022973	-6.53347	8.81e-11
CLEC10A	smoker	0.286427	0.0219254	13.0637	5.36e-37
CLEC1B	smoker	-0.230624	0.040991	-5.62622	2.2e-08
CMTM8	smoker	0.157544	0.0280259	5.62137	2.26e-08
CNTNAP2	smoker	0.950912	0.144916	6.56182	7.32e-11
COL8A2	smoker	0.120713	0.0161941	7.45414	1.53e-13
CSF3R	smoker	0.0742326	0.0132473	5.60359	2.5e-08
CSNK1E	smoker	0.0708872	0.0135593	5.22793	1.96e-07
CST3	smoker	0.0578223	0.01129	5.12155	3.43e-07
CTSD	smoker	0.0794267	0.0147193	5.3961	7.92e-08
CTSL1	smoker	-0.181148	0.0248611	-7.28639	5.15e-13
CXCL16	smoker	-0.108998	0.0147781	-7.37567	2.71e-13
CXXC5	smoker	0.111953	0.0200473	5.58442	2.78e-08
CYB561	smoker	-0.0919297	0.0144642	-6.35566	2.75e-10
CYFIP1	smoker	0.0628508	0.0120821	5.20198	2.25e-07
CYFIP2	smoker	-0.130348	0.0156609	-8.32312	1.92e-16
CYP1B1	smoker	0.163114	0.0237108	6.87932	8.84e-12
CYP2U1	smoker	-0.226561	0.0441565	-5.13088	3.26e-07
CYP4F22	smoker	-1.00526	0.0574519	-17.4974	1.81e-62
CYP4V2	smoker	-0.142653	0.0266358	-5.35568	9.87e-08
DBNDD2	smoker	0.07878	0.0154278	5.10638	3.71e-07
DEXI	smoker	0.0953169	0.0176671	5.39516	7.96e-08
DHRS3	smoker	-0.210638	0.0363536	-5.79413	8.37e-09
DHRS9	smoker	-0.178721	0.02829	-6.31745	3.51e-10
DLL1	smoker	-0.367533	0.0610105	-6.0241	2.14e-09
DPYSL2	smoker	0.0570194	0.0109723	5.19665	2.31e-07
DSC2	smoker	0.303175	0.0300414	10.0919	3.3e-23
DTNA	smoker	0.382441	0.0530336	7.2113	8.8e-13
DUSP5	smoker	-0.249722	0.0265229	-9.41534	1.73e-20
EHD1	smoker	-0.0616657	0.0115747	-5.32765	1.15e-07
EIF2C4	smoker	0.0998617	0.0189304	5.27521	1.52e-07
EIF4G1	smoker	0.0726031	0.0137438	5.28259	1.46e-07
ENDOGL1	smoker	-0.143354	0.0245781	-5.83259	6.69e-09
ENG	smoker	0.0965838	0.0185552	5.20522	2.21e-07
EPB41L3	smoker	0.0963175	0.0187635	5.13323	3.22e-07
ERN1	smoker	0.0594892	0.0113078	5.26089	1.64e-07
EXOC3	smoker	0.0891454	0.0153858	5.79403	8.38e-09
FAM129A	smoker	0.156854	0.0279426	5.61345	2.36e-08
FAM129B	smoker	0.0896605	0.0131574	6.81447	1.37e-11
FAM20C	smoker	0.181496	0.0201168	9.02215	5.56e-19
FCGBP	smoker	-0.362407	0.0507197	-7.1453	1.4e-12
FCGR2B	smoker	0.185997	0.0349499	5.32182	1.18e-07
FCGR3A	smoker	-0.376644	0.0575537	-6.54423	8.21e-11
FKBP9L	smoker	0.225715	0.0347137	6.50219	1.08e-10
FLT3LG	smoker	-0.12174	0.0218286	-5.57707	2.9e-08
FLVCR2	smoker	0.0745127	0.0132391	5.62821	2.17e-08
FOXC1	smoker	-0.309578	0.0596659	-5.18852	2.41e-07
FPR3	smoker	0.386019	0.0380215	10.1527	1.85e-23
FRAT1	smoker	0.0851982	0.0131973	6.45572	1.46e-10
FRAT2	smoker	0.0568589	0.0109429	5.19595	2.32e-07
FTH1	smoker	-0.0739407	0.0129521	-5.70878	1.37e-08
FUCA1	smoker	0.262411	0.0190876	13.7477	1.44e-40
GAS6	smoker	0.178979	0.0240258	7.44944	1.58e-13
GBGT1	smoker	0.0743666	0.0142429	5.22133	2.03e-07
GBP1	smoker	-0.194996	0.0368043	-5.2982	1.35e-07
GBP2	smoker	-0.114336	0.0174782	-6.54167	8.35e-11
GBP4	smoker	-0.238767	0.028634	-8.33858	1.69e-16
GBP5	smoker	-0.225936	0.0319924	-7.06215	2.51e-12
GCH1	smoker	-0.151431	0.0225296	-6.72142	2.56e-11
GCHFR	smoker	0.0954286	0.0173861	5.48878	4.75e-08
GFOD1	smoker	-0.104143	0.015911	-6.54536	8.15e-11
GFRA2	smoker	0.385636	0.0289894	13.3027	3.14e-38
GGT1	smoker	0.127567	0.0226558	5.63065	2.14e-08
GLYCTK	smoker	0.0898784	0.0165166	5.4417	6.17e-08
GNA15	smoker	0.0669087	0.0122469	5.46332	5.47e-08
GPR155	smoker	-0.33359	0.0609164	-5.4762	5.1e-08
GPR160	smoker	0.189764	0.0228758	8.29542	2.4e-16
GPR162	smoker	0.0999443	0.0141844	7.04605	2.81e-12
GPR35	smoker	0.145707	0.0247471	5.88785	4.83e-09
GPR44	smoker	-0.235002	0.0370598	-6.34116	3.02e-10
GPR82	smoker	0.525473	0.0950106	5.53067	3.76e-08
GRAMD4	smoker	0.0963746	0.0133887	7.19821	9.66e-13
GRB14	smoker	-0.157009	0.0282893	-5.5501	3.38e-08
GRN	smoker	0.0639678	0.0107312	5.96094	3.13e-09
GSTA4	smoker	-0.680384	0.082079	-8.28938	2.52e-16
GUCY1A3	smoker	-0.217886	0.0355965	-6.12098	1.19e-09
GVIN1	smoker	-0.162029	0.0196508	-8.24541	3.58e-16
HDAC4	smoker	0.118348	0.0230513	5.13414	3.21e-07
HEMGN	smoker	-0.462816	0.0833798	-5.5507	3.37e-08
HES4	smoker	-0.271197	0.0333396	-8.13438	8.66e-16
HIST1H1C	smoker	-0.174966	0.0307922	-5.68215	1.6e-08
HIST1H2AE	smoker	-0.299722	0.0529685	-5.65849	1.83e-08
HIST1H2BC	smoker	-0.223185	0.0403457	-5.53181	3.74e-08
HIST1H2BH	smoker	-0.21067	0.0392972	-5.36093	9.59e-08
HIST1H4H	smoker	-0.297934	0.0575279	-5.17894	2.54e-07
HLA-DPA1	smoker	-0.0882393	0.0162779	-5.4208	6.92e-08
HPS6	smoker	0.0631518	0.0105863	5.96542	3.05e-09
HSPB1	smoker	-0.13933	0.0206319	-6.75314	2.07e-11
HTRA1	smoker	0.311849	0.0437131	7.13401	1.52e-12
ICAM2	smoker	-0.101388	0.0171222	-5.92143	3.96e-09
ID3	smoker	0.224395	0.0377013	5.95192	3.3e-09
IER5	smoker	-0.0900039	0.0128194	-7.02088	3.34e-12
IER5L	smoker	0.102552	0.0198513	5.16603	2.72e-07
IFFO	smoker	0.0497084	0.00894108	5.55955	3.2e-08
IGF2BP3	smoker	-0.164442	0.0310434	-5.29718	1.35e-07
IL12RB1	smoker	-0.129063	0.0157419	-8.19874	5.2e-16
IL1RN	smoker	0.0830957	0.0162175	5.12384	3.39e-07
IL21R	smoker	-0.190313	0.0261191	-7.28637	5.15e-13
IL4R	smoker	0.0721825	0.0130318	5.53896	3.59e-08
IMPA2	smoker	0.0889276	0.0140235	6.34132	3.02e-10
INSIG1	smoker	-0.136513	0.021852	-6.24713	5.45e-10
IQCK	smoker	-0.201837	0.0262506	-7.68886	2.69e-14
IRF1	smoker	-0.113402	0.0143681	-7.89263	5.7e-15
ITGAM	smoker	0.0710487	0.0137489	5.1676	2.69e-07
ITGB7	smoker	0.130045	0.0206455	6.29894	3.94e-10
ITLN1	smoker	-0.224745	0.0280626	-8.00872	2.32e-15
KIF21B	smoker	-0.103701	0.019603	-5.29007	1.41e-07
KLF4	smoker	-0.0888109	0.0163069	-5.44621	6.01e-08
LAMA5	smoker	0.222231	0.0416701	5.33311	1.11e-07
LBA1	smoker	-0.131176	0.019212	-6.8278	1.25e-11
LDLR	smoker	0.184867	0.0215663	8.57207	2.51e-17
LRPAP1	smoker	0.130822	0.0215552	6.06917	1.63e-09
LST1	smoker	-0.0914108	0.0162951	-5.60971	2.41e-08
LYPD2	smoker	-0.492968	0.0484677	-10.1711	1.55e-23
M6PRBP1	smoker	0.0623161	0.009732	6.40321	2.04e-10
MAFG	smoker	0.0948653	0.0163234	5.8116	7.56e-09
MAP3K6	smoker	0.170244	0.0192663	8.83637	2.74e-18
MAP3K8	smoker	-0.067001	0.0127489	-5.25544	1.69e-07
MAPK13	smoker	0.269146	0.0293123	9.18202	1.38e-19
MCM7	smoker	-0.0513342	0.00997971	-5.14386	3.05e-07
MEPCE	smoker	-0.0718148	0.0134373	-5.34442	1.05e-07
MGAT4A	smoker	0.152153	0.0187553	8.11252	1.03e-15
MGST1	smoker	0.132704	0.0246047	5.39342	8.03e-08
MKNK1	smoker	0.0849052	0.0139204	6.09936	1.36e-09
MMP25	smoker	0.471369	0.0301926	15.6121	5.44e-51
MORG1	smoker	0.0934446	0.0179343	5.21037	2.15e-07
MS4A7	smoker	-0.119209	0.0137463	-8.67205	1.09e-17
MSRB3	smoker	-0.177977	0.0346454	-5.13712	3.16e-07
MT2A	smoker	-0.138606	0.0242082	-5.72558	1.25e-08
MTSS1	smoker	-0.164648	0.0196308	-8.38719	1.14e-16
MVD	smoker	0.131276	0.0247433	5.30552	1.29e-07
MYCT1	smoker	-0.331219	0.0641934	-5.15971	2.81e-07
NAP1L1	smoker	-0.105211	0.0198292	-5.30586	1.29e-07
NCF4	smoker	0.155902	0.0141182	11.0426	2.66e-27
[truncated: 122 more rows]
